# Supplementary material for: Release probability increases towards distal dendrites boosting high-frequency signal transfer in the rodent hippocampus
Source: eLife. 2021 Jan 13;10:e62588. doi: 10.7554/eLife.62588 (PMC7837677; doi:10.7554/eLife.62588)
Supplement: Figure 1—source data 1. [file elife-62588-fig1-data1.xlsx]

## Sheet: Figure 1
Distance to soma, um	P(0,0)	P(1,1)	P(1,0)	P(0,1)	Basal release probability (first pulse)	Release probability (2nd pulse)	PPR	PPR adjusted (p2*/p1)
200.467	0.0625	0.375	0.1875	0.375	0.5625	0.75	1.33333	1.52381
57.7	0.16667	0.25	0.08333	0.5	0.33333	0.75	2.25	2.25
45.537					0.53333			--
318.212	0.16667	0.25	0.25	0.33333	0.5	0.58333	1.16667	1.33333
157.107	0.4375	0.25	0	0.3125	0.25	0.5625	2.25	1.66667
175.346	0.2	0.25	0.05	0.5	0.3	0.75	2.5	2.38095
149.626	0.28571	0.21429	0.07143	0.42857	0.28571	0.64286	2.25	2.1
108.06	0.15385	0.30769	0.15385	0.38462	0.46154	0.69231	1.5	1.54762
163.823					0.13333			--
134.829	0.09341	0.30769	0.21429	0.38462	0.52198	0.69231		1.54144
93.581					0.13333		1.32632	--
159.281	0.5	0.21429	0	0.28571	0.21429	0.5		1.69697
173.072					0.66667		2.33333	--
179.773	0.5	0.35714	0	0.14286	0.35714	0.5		0.62222
127.782	0.26316	0.21053	0.05263	0.47368	0.26316	0.68421	1.4	2.44286
119.211	0.41667	0.16667	0.08333	0.33333	0.25	0.5	2.6	1.77778
81.046	0.35714	0.07143	0.14286	0.42857	0.21429	0.5	2	2.54545
83.853					0.2		2.33333	--
89.692	0.2	0.26667	0.2	0.33333	0.46667	0.6		1.33929
163.127	0.19048	0.2381	0.19048	0.38095	0.42857	0.61905	1.28571	1.55556
103.737					0.1875		1.44444	--
123.005	0.22222	0.27778	0.11111	0.38889	0.38889	0.66667		1.63636
143.432	0.15789	0.31579	0.05263	0.47368	0.375	0.78947		2
128.702					0.35714		1.71429	--
83.964					0.61538		2.10526	--
220.88					0.35294			--
149.212	0.125	0.125	0.125	0.625	0.25	0.75		3.33333
150.89	0.2	0.26667	0.06667	0.46667	0.33333	0.73333		2.1
133.463					0.4		3	--
80.844	0.26667	0.13333	0.06667	0.53333	0.2	0.66667	2.2	3.33333
151.535					0.26667			--
110.995	0.5625	0.0625	0.0625	0.3125	0.125	0.375	3.33333	2.85714
196.594					0.4			--
89.337					0.13333		3	--
207.189	0.13333	0.26667	0.2	0.4	0.46667	0.66667		1.60714
60.381	0.53333	0.13333	0	0.33333	0.13333	0.46667		2.88462
186.883					0.5625		1.42857	--
172.464	0.2	0.26667	0.13333	0.4	0.4	0.66667	3.5	1.66667
199.903					0.46154			--
167.213	0.13333	0.26667	0	0.6	0.26667	0.86667		3.06818
214.389	0.30769	0.23077	0.07692	0.38462	0.30769	0.61538		1.80556
119.26	0.3125	0.1875	0.125	0.375	0.3125	0.5625	1.66667	1.74545
168.221					0.33333			--
188.712	0.13333	0.46667	0.06667	0.33333	0.53333	0.8		1.33929
253.208					0.35714		3.25	--
138.38	0.28571	0.07143	0.07143	0.57143	0.14286	0.64286	2	4.66667
193.802	0.13333	0.33333	0.06667	0.46667	0.4	0.8		1.94444
146.686	0.21429	0.28571	0.21429	0.28571	0.5	0.57143	1.8	1.14286
174.898					0.23529			--
221.22	0.3125	0.1875	0.125	0.375	0.3125	0.5625		1.74545
267.08					0.7		1.5	--
142.306					0.5			--
190.689					0.4			--
229.231	0.5625	0.125	0.0625	0.25	0.1875	0.375	4.5	1.64103
318.792	0.35294	0.23529	0	0.41176	0.6875	0.64706	2	0.78322
153.258					0.45455			--
173.637					0.5		1.14286	--
191.248					0.2	0		--
235.076	0.13333	0.4	0.2	0.26667	0.6	0.66667		1.11111
167.464	0	0.58824	0.05882	0.35294	0.64706	0.94118	1.8	1.54545
203.814	0.1875	0.375	0.125	0.3125	0.5	0.6875		1.25
121.87	0.55556	0	0.05556	0.38889	0.05556	0.38889		7.41176
172.52	0.5	0.1875	0	0.3125	0.1875	0.5		2.05128
95.346					0.2			--
135.402					0.307			--
143.701					0.4375		2	--
168.711					0.375		0.94118	--
92.3333	0.4	0.2	0.06667	0.33333	0.26667	0.53333		1.70455
167.095	0.15385	0.38462	0.23077	0.30769	0.53846	0.69231		1.2381
							1.11111
							1.375
							1.45455
							7
							2.66667
							2
							1.28571

## Sheet: Supplement 1
Distance from Soma, um	Mean DG/R Suscesses	Standard deviation DG/R Successes	Mean DG/R Failure	Standard deviation DG/R Failure
200.467	0.16569	0.08296	0.00319	0.01905
57.7	0.11868	0.06818	0.00216	0.01496
45.537	0.10473	0.02784	-0.00262	0.00965
318.212	0.12347	0.02916	-0.0011	0.0123
157.107	0.13786	0.03795	0.00753	0.01808
175.346	0.19781	0.04235	0.00352	0.01789
149.626	0.15168	0.03601	0.00572	0.014
108.06	0.09958	0.02911	0.00118	0.01178
163.823	0.27439	0.08305	0.0173	0.03873
134.829	0.19758	0.13037	-0.00109	0.0176
93.581	0.22657	0.04983	-0.00306	0.01112
159.281	0.11336	0.03845	0.00475	0.01199
173.072	0.19479	0.05173	-0.01034	0.01555
179.773	0.13829	0.04025	0.00365	0.00898
127.782	0.11906	0.03649	-0.00238	0.01131
119.211	0.13559	0.04874	0.00412	0.01056
81.046	0.12031	0.02621	-0.00181	0.01489
83.853	0.14726	0.05611	-0.00456	0.00822
89.692	0.12998	0.03105	0.00667	0.00982
163.127	0.11806	0.02887	-0.00263	0.01267
103.737	0.09562	0.04123	-0.000379352	0.01073
123.005	0.11535	0.03241	0.000966876	0.01321
143.432	0.07426	0.02321	-0.00211	0.00577
128.702	0.1062	0.04263	0.00318	0.00875
83.964	0.11866	0.03723	0.02754	0.04924
220.88	0.24711	0.05274	0.00312	0.01714
149.212	0.23738	0.06861	0.01764	0.03103
150.89	0.09046	0.03067	-0.000317045	0.00781
133.463	0.12435	0.01765	0.0099	0.01528
80.844	0.27456	0.03137	3.38929e-05	0.01981
151.535	0.13586	0.03501	0.00683	0.02153
110.995	0.14308	0.02333	0.000722344	0.019
196.594	0.11352	0.01859	0.0066	0.01137
89.337	0.1746	0.0017	-0.00226	0.01747
207.189	0.19388	0.04643	0.00523	0.03288
60.381	0.16546	0.00407	0.00738	0.01654
186.883	0.22995	0.06473	0.0106	0.03022
172.464	0.23973	0.04088	0.00501	0.00873
199.903	0.11334	0.03453	0.00409	0.00955
167.213	0.000998269	0.00741	0.03786	0.04711
214.389	0.07681	0.02126	-0.000200656	0.01082
119.26	0.12907	0.02567	-0.00175	0.01484
168.221	0.1572	0.0183	-0.00255	0.00801
188.712	0.13045	0.02535	0.0056	0.02004
253.208	0.12892	0.0342	-7.19267e-05	0.01366
138.38	0.07845	0.00579	0.00596	0.00754
193.802	0.07512	0.01931	0.00753	0.00441
146.686	0.17397	0.04734	0.00598	0.02061
174.898	0.25221	0.02618	0.01047	0.0377
221.22	0.21991	0.03031	0.00067779	0.00974
267.08	0.20214	0.03772	-0.00369	0.0127
142.306	0.21671	0.07938	0.01045	0.02128
190.689	0.15355	0.02831	0.01459	0.01889
229.231	0.10779	0.02858	0.00060248	0.00853
318.792	0.09655	0.02662	-0.00295	0.0156
153.258	0.09162	0.01915	0.00342	0.00809
173.451	0.0909	0.01326	-0.00244	0.01043
191.248	0.17345	0.00523	-0.00772	0.01261
235.076	0.10361	0.04053	-0.00448	0.00959
167.464	0.07265	0.02339	-0.00389	0.0076
203.814	0.0757	0.04566	-0.00381	0.00935
95.346	0.11643	0.03694	0.00201	0.01421
135.402	0.12093	0.03906	-0.00231	0.01051
143.701	0.07683	0.01694	-0.000753728	0.00963
168.711	0.093	0.0408	0.00139	0.01164
92.3333	0.14047	0.03181	0.01104	0.01804
167.095	0.12304	0.0339	0.0073	0.01385
