# Supplementary material for: Release probability increases towards distal dendrites boosting high-frequency signal transfer in the rodent hippocampus
Source: eLife. 2021 Jan 13;10:e62588. doi: 10.7554/eLife.62588 (PMC7837677; doi:10.7554/eLife.62588)
Supplement: Figure 2—source data 1. [file elife-62588-fig2-data1.xlsx]

## Sheet: Figure 2 + fig Supplement
Distance from soma, um	Distance from Prim dend, um	Spine density, per 10 um	Relative branch position	P(1,1)	Release probability (1st pulse)	Paied-pulse ratio		Distance from soma, um	Percentage change in Pr
200.467	80.876	11	0.40252	0.375	0.5625	1.33333		9.928	9.89011
57.7	37.789	14	0.68473	0.25	0.33333	2.25		16.711	15.5
45.537	15.382	10	0.29656		0.53333			25.01	14.3836
318.212	77.5	12	0.73152	0.25	0.5	1.16667		33.089	15.3558
157.107	22.887	9	0.71388	0.25	0.25	2.25		36.35	22.7203
175.346	102.1	8	0.80538	0.25	0.3	2.5		40.056	53.5
149.626	63.839	7	0.40652	0.21429	0.28571	2.25		43.828	200
108.06	9.716	8	0.3596	0.30769	0.46154	1.5		45.928	6.38978
163.823	59.652	6			0.13333			50.65	235.714
134.829	80.356	6	0.61255	0.30769	0.52198	1.32632		51.286	20
93.581	14.702	6	0.30328		0.13333			52.665	123.642
159.281	34.79	7	0.64259	0.21429	0.21429	2.33333		57.883	53
173.072	75.558	9	0.38188		0.66667			57.93	179.72
179.773	104.231	11	0.78147	0.35714	0.35714	1.4		64.496	33.0206
127.782	74.566	7	0.5352	0.21053	0.26316	2.6		74.762	101.498
119.211	68.631	6	0.53124	0.16667	0.25	2		101.032	265.957
81.046	28.257	8	0.18029	0.07143	0.21429	2.33333
83.853	36.809	9	0.42041		0.2
89.692	33.197	11	0.51538	0.26667	0.46667	1.28571
163.127	38.317	9	0.30766	0.2381	0.42857	1.44444
103.737	46.154		0.61204		0.1875
123.005	85.379	10	0.27608	0.27778	0.38889	1.71429
143.432	34.355	8	0.2682	0.31579	0.375	2.10526
128.702	23.853	8	0.39799		0.35714
83.964	12.045	12	0.12859		0.61538
220.88	98.159	11	0.39826		0.35294
149.212	97.89	5	0.50539	0.125	0.25	3
150.89	56.851	15	0.19871	0.26667	0.33333	2.2
133.463	19.13	9	0.4336		0.4
80.844	21.104	8	0.53477	0.13333	0.2	3.33333
151.535	93.403	12	0.71686		0.26667
110.995	40.562	9	0.78586	0.0625	0.125	3
196.594	105.35	11	0.41343		0.4
89.337	7.551	8	0.22851		0.13333
207.189	97.68	13	0.47054	0.26667	0.46667	1.42857
60.381	26.465	10	0.54345	0.13333	0.13333	3.5
186.883	98.966	9	0.66936		0.5625
172.464	40.764	9	0.42809	0.26667	0.4	1.66667
199.903	64.649	12	0.6607		0.46154
167.213	56.751	6	0.41583	0.26667	0.26667	3.25
214.389	103.887	8	0.69017	0.23077	0.30769	2
119.26	43.339	12	0.3108	0.1875	0.3125	1.8
168.221	102.113	12	0.6274		0.33333
188.712	39.244	7	0.39866	0.46667	0.53333	1.5
253.208	103.74	10	0.78227		0.35714
138.38	58.603	9	0.44635	0.07143	0.14286	4.5
193.802	109.844	11	0.87635	0.33333	0.4	2
146.686	57.871	10	0.68124	0.28571	0.5	1.14286
174.898	84.107	5	0.96179		0.23529
221.22	83.169	7	0.11383	0.1875	0.3125	1.8
267.08	147.521	12	0.85068		0.7
142.306	46.327	10	0.44052		0.5
190.689	97.613	13	0.8782		0.4
229.231	36.475	12	0.26334	0.125	0.1875	2
318.792	137.507	10	0.93221	0.23529	0.6875	0.94118
153.258	10.451	9	0.25532		0.45455
173.637	20.379	10	0.66535		0.5
191.248	60.571	16	0.41032		0.2
235.076	104.399	10	0.70722	0.4	0.6	1.11111
167.464	101.334	9	0.91908	0.58824	0.64706	1.375
203.814	137.684	6	0.81018	0.375	0.5	1.45455
121.87	30.82	12	0.67684	0	0.05556	7
172.52	81.47	13	0.52018	0.1875	0.1875	2.66667
95.346	26.765	4			0.2
135.402	66.821	9			0.307
143.701	80.588	10			0.4375
168.711	105.598	11			0.375
92.3333	66.24	9	0.68895	0.2	0.26667	2
167.095	141.002	14	0.57395	0.38462	0.53846	1.28571
