# Supplementary material for: Release probability increases towards distal dendrites boosting high-frequency signal transfer in the rodent hippocampus
Source: eLife. 2021 Jan 13;10:e62588. doi: 10.7554/eLife.62588 (PMC7837677; doi:10.7554/eLife.62588)
Supplement: Figure 3—source data 1. [file elife-62588-fig3-data1.xlsx]

## Sheet: Figure 3
Distance from s pyramidale, um	Paired-pulse ratio	iGluSnFR signal DF/F0
170	1.41374	0.22356
175	0.90186	0.46103
185	1.34888	0.35959
186.5	1.10022	0.42148
81	1.61152
80	1.92059	0.33749
88	1.82593	0.39181
85	2.01612	0.21099
83	1.70573	0.19831
35	1.85151	0.19064
28	1.82638	0.28261
20	1.86062	0.41048
26	1.85037	0.2979
35	1.99222	0.26911
45	1.80836	0.4763
170	1.28815	0.68999
210	1.20534	0.40988
213	1.33068	0.17505
187	0.96761	0.63766
200	1.3405	0.29771
208	0.88675	0.25367
170	1.26329	0.58552
172	1.34756	0.51087
160	1.2836	0.80799
165	0.89827	0.53131
100	1.76953	0.24572
80	1.73709	0.50641
78	1.55773	0.43957
90	1.47205	0.31323
100	1.51176	0.31
105	1.64803	0.23796
130	1.40322	0.25558
180	1.08974	0.30034

## Sheet: Figure supplement 1
Distance to s pyramidale, um	DF/F0 signal slope between pulses 1-5
130	0.22434
144	0.2983
157	0.35569
163	0.23258
155	0.11589
165	-0.06697
182	0.60309
170	1.00648
172	0.91404
165	0.51223
188	0.40977
184	0.33019
240	0.63611
240	0.88394
247	0.57209
253	0.64487
264	0.22398
70	0.07583
73	0.04961
80	0.05315
160	0.00628
163	0.06672
155	0.09651
165	0.10347
190	0.06259
186	0.02237
200	0.31543
190	0.01387
184	0.07503
197	0.06936
180	0.11781
194	0.0679
270	0.63577
294	0.44071
275	1.27286
277	1.41269
295	0.6752
287	0.51663
130	0.2018
150	0.05794
140	-0.00597
87	0.13576
101	-0.01911
80	-0.15948
73	-0.02811
93	0.01191
90	0.02837
75	0.02368
84	0.07052
278	0.1424
302	0.20942
293	0.11894
297	0.26562
270	0.19088
280	0.72938
300	0.53292
304	1.51675
294	1.25052
307	1.4708
290	1.92929
324	1.54233
