# Supplementary material for: Release probability increases towards distal dendrites boosting high-frequency signal transfer in the rodent hippocampus
Source: eLife. 2021 Jan 13;10:e62588. doi: 10.7554/eLife.62588 (PMC7837677; doi:10.7554/eLife.62588)
Supplement: Figure 4—source data 1. [file elife-62588-fig4-data1.xlsx]

## Sheet: Figure 4A
X_Time, ms	Y_Uniform Pr	Y_Pr trend	Y_ +density trend
0.2	0.5134	0.5134	0.5134
0.4	-0.8819	-0.8819	-0.8819
0.6	-0.1717	-0.1717	-0.1717
0.8	-0.5534	-0.5534	-0.5534
1	-0.1469	-0.1469	-0.1469
1.2	-0.3026	-0.3026	-0.3026
1.4	-0.0112	-0.0112	-0.0112
1.6	-0.0809	-0.0809	-0.0809
1.8	0.1473	0.1473	0.1473
2	0.1168	0.1168	0.1168
2.2	0.303	0.303	0.303
2.4	0.2923	0.2923	0.2923
2.6	0.4479	0.4479	0.4479
2.8	0.4476	0.4476	0.4476
3	0.5797	0.5797	0.5797
3.2	0.585	0.585	0.585
3.4	0.6985	0.6985	0.6985
3.6	0.7066	0.7066	0.7066
3.8	0.805	0.805	0.805
4	0.8142	0.8142	0.8142
4.2	0.9001	0.9001	0.9001
4.4	0.9094	0.9094	0.9094
4.6	0.9846	0.9846	0.9846
4.8	0.9933	0.9933	0.9933
5	1.0594	1.0594	1.0594
5.2	1.067	1.067	1.067
5.4	1.1251	1.1251	1.1251
5.6	1.1314	1.1314	1.1314
5.8	1.1824	1.1824	1.1824
6	1.1872	1.1872	1.1872
6.2	1.232	1.232	1.232
6.4	1.2352	1.2352	1.2352
6.6	1.2743	1.2743	1.2743
6.8	1.276	1.276	1.276
7	1.3101	1.3101	1.3101
7.2	1.3101	1.3101	1.3101
7.4	1.3397	1.3397	1.3397
7.6	1.3382	1.3382	1.3382
7.8	1.3638	1.3638	1.3638
8	1.3607	1.3607	1.3607
8.2	1.3826	1.3826	1.3826
8.4	1.3781	1.3781	1.3781
8.6	1.3967	1.3967	1.3967
8.8	1.3908	1.3908	1.3908
9	1.4064	1.4064	1.4064
9.2	1.3993	1.3993	1.3993
9.4	1.4122	1.4122	1.4122
9.6	1.404	1.404	1.404
9.8	1.4144	1.4144	1.4144
10	1.4051	1.4051	1.4051
10.2	1.4133	1.4133	1.4133
10.4	1.403	1.403	1.403
10.6	1.4092	1.4092	1.4092
10.8	1.398	1.398	1.398
11	1.4024	1.4024	1.4024
11.2	1.3904	1.3904	1.3904
11.4	1.3932	1.3932	1.3932
11.6	1.3805	1.3805	1.3805
11.8	1.3818	1.3818	1.3818
12	1.3684	1.3684	1.3684
12.2	1.3685	1.3685	1.3685
12.4	1.3545	1.3545	1.3545
12.6	1.3534	1.3534	1.3534
12.8	1.339	1.339	1.339
13	1.3368	1.3368	1.3368
13.2	1.3219	1.3219	1.3219
13.4	1.3188	1.3188	1.3188
13.6	1.3036	1.3036	1.3036
13.8	1.2996	1.2996	1.2996
14	1.2841	1.2841	1.2841
14.2	1.2794	1.2794	1.2794
14.4	1.2636	1.2636	1.2636
14.6	1.2583	1.2583	1.2583
14.8	1.2423	1.2423	1.2423
15	1.2364	1.2364	1.2364
15.2	1.2202	1.2202	1.2202
15.4	1.2138	1.2138	1.2138
15.6	1.1975	1.1975	1.1975
15.8	1.1907	1.1907	1.1907
16	1.1744	1.1744	1.1744
16.2	1.1672	1.1672	1.1672
16.4	1.1508	1.1508	1.1508
16.6	1.1433	1.1433	1.1433
16.8	1.1269	1.1269	1.1269
17	1.1191	1.1191	1.1191
17.2	1.1027	1.1027	1.1027
17.4	1.0947	1.0947	1.0947
17.6	1.0784	1.0784	1.0784
17.8	1.0702	1.0702	1.0702
18	1.054	1.054	1.054
18.2	1.0457	1.0457	1.0457
18.4	1.0295	1.0295	1.0295
18.6	1.0211	1.0211	1.0211
18.8	1.0051	1.0051	1.0051
19	0.9966	0.9966	0.9966
19.2	0.9807	0.9807	0.9807
19.4	0.9722	0.9722	0.9722
19.6	0.9565	0.9565	0.9565
19.8	0.9479	0.9479	0.9479
20	0.9323	0.9323	0.9323
20.2	0.9238	0.9238	0.9238
20.4	0.9084	0.9084	0.9084
20.6	0.8999	0.8999	0.8999
20.8	0.8847	0.8847	0.8847
21	0.8762	0.8762	0.8762
21.2	0.8612	0.8612	0.8612
21.4	0.8528	0.8528	0.8528
21.6	0.8381	0.8381	0.8381
21.8	0.8297	0.8297	0.8297
22	0.8152	0.8152	0.8152
22.2	0.8069	0.8069	0.8069
22.4	0.7926	0.7926	0.7926
22.6	0.7844	0.7844	0.7844
22.8	0.7703	0.7703	0.7703
23	0.7623	0.7623	0.7623
23.2	0.7485	0.7485	0.7485
23.4	0.7405	0.7405	0.7405
23.6	0.7269	0.7269	0.7269
23.8	0.7191	0.7191	0.7191
24	0.7058	0.7058	0.7058
24.2	0.6981	0.6981	0.6981
24.4	0.685	0.685	0.685
24.6	0.6774	0.6774	0.6774
24.8	0.6646	0.6646	0.6646
25	0.6572	0.6572	0.6572
25.2	0.6446	0.6446	0.6446
25.4	0.6373	0.6373	0.6373
25.6	0.625	0.625	0.625
25.8	0.6179	0.6179	0.6179
26	0.6058	0.6058	0.6058
26.2	0.5989	0.5989	0.5989
26.4	0.587	0.587	0.587
26.6	0.5803	0.5803	0.5803
26.8	0.5687	0.5687	0.5687
27	0.562	0.562	0.562
27.2	0.5507	0.5507	0.5507
27.4	0.5442	0.5442	0.5442
27.6	0.5331	0.5331	0.5331
27.8	0.5268	0.5268	0.5268
28	0.516	0.516	0.516
28.2	0.5099	0.5099	0.5099
28.4	0.4992	0.4992	0.4992
28.6	0.4933	0.4933	0.4933
28.8	0.4829	0.4829	0.4829
29	0.4771	0.4771	0.4771
29.2	0.467	0.467	0.467
29.4	0.4613	0.4613	0.4613
29.6	0.4514	0.4514	0.4514
29.8	0.4459	0.4459	0.4459
30	0.4362	0.4362	0.4362
30.2	0.4309	0.4309	0.4309
30.4	0.4215	0.4215	0.4215
30.6	0.4163	0.4163	0.4163
30.8	0.4071	0.4071	0.4071
31	0.4021	0.4021	0.4021
31.2	0.3931	0.3931	0.3931
31.4	0.3882	0.3882	0.3882
31.6	0.3794	0.3794	0.3794
31.8	0.3747	0.3747	0.3747
32	0.3662	0.3662	0.3662
32.2	0.3616	0.3616	0.3616
32.4	0.3533	0.3533	0.3533
32.6	0.3489	0.3489	0.3489
32.8	0.3407	0.3407	0.3407
33	0.3364	0.3364	0.3364
33.2	0.3285	0.3285	0.3285
33.4	0.3244	0.3244	0.3244
33.6	0.3166	0.3166	0.3166
33.8	0.3127	0.3127	0.3127
34	0.3051	0.3051	0.3051
34.2	0.3013	0.3013	0.3013
34.4	0.2939	0.2939	0.2939
34.6	0.2902	0.2902	0.2902
34.8	0.283	0.283	0.283
35	0.2795	0.2795	0.2795
35.2	0.2725	0.2725	0.2725
35.4	0.269	0.269	0.269
35.6	0.2622	0.2622	0.2622
35.8	0.2589	0.2589	0.2589
36	0.2523	0.2523	0.2523
36.2	0.2491	0.2491	0.2491
36.4	0.2426	0.2426	0.2426
36.6	0.2396	0.2396	0.2396
36.8	0.2333	0.2333	0.2333
37	0.2303	0.2303	0.2303
37.2	0.2242	0.2242	0.2242
37.4	0.2214	0.2214	0.2214
37.6	0.2154	0.2154	0.2154
37.8	0.2127	0.2127	0.2127
38	0.2069	0.2069	0.2069
38.2	0.2043	0.2043	0.2043
38.4	0.1986	0.1986	0.1986
38.6	0.1961	0.1961	0.1961
38.8	0.1906	0.1906	0.1906
39	0.1882	0.1882	0.1882
39.2	0.1829	0.1829	0.1829
39.4	0.1806	0.1806	0.1806
39.6	0.1753	0.1753	0.1753
39.8	0.1732	0.1732	0.1732
40	0.1681	0.1681	0.1681
40.2	0.166	0.166	0.166
40.4	0.161	0.161	0.161
40.6	0.1591	0.1591	0.1591
40.8	0.1542	0.1542	0.1542
41	0.1523	0.1523	0.1523
41.2	0.1477	0.1477	0.1477
41.4	0.1459	0.1459	0.1459
41.6	0.1413	0.1413	0.1413
41.8	0.1396	0.1396	0.1396
42	0.1351	0.1351	0.1351
42.2	0.1335	0.1335	0.1335
42.4	0.1292	0.1292	0.1292
42.6	0.1276	0.1276	0.1276
42.8	0.1234	0.1234	0.1234
43	0.1219	0.1219	0.1219
43.2	0.1178	0.1178	0.1178
43.4	0.1165	0.1165	0.1165
43.6	0.1125	0.1125	0.1125
43.8	0.1112	0.1112	0.1112
44	0.1073	0.1073	0.1073
44.2	0.106	0.106	0.106
44.4	0.1023	0.1023	0.1023
44.6	0.1011	0.1011	0.1011
44.8	0.0974	0.0974	0.0974
45	0.0963	0.0963	0.0963
45.2	0.0927	0.0927	0.0927
45.4	0.0917	0.0917	0.0917
45.6	0.0882	0.0882	0.0882
45.8	0.0873	0.0873	0.0873
46	0.0839	0.0839	0.0839
46.2	0.083	0.083	0.083
46.4	0.0797	0.0797	0.0797
46.6	0.0788	0.0788	0.0788
46.8	0.0756	0.0756	0.0756
47	0.0748	0.0748	0.0748
47.2	0.0717	0.0717	0.0717
47.4	0.071	0.071	0.071
47.6	0.068	0.068	0.068
47.8	0.0673	0.0673	0.0673
48	0.0643	0.0643	0.0643
48.2	0.0637	0.0637	0.0637
48.4	0.0608	0.0608	0.0608
48.6	0.0602	0.0602	0.0602
48.8	0.0575	0.0575	0.0575
49	0.0569	0.0569	0.0569
49.2	0.0542	0.0542	0.0542
49.4	0.0537	0.0537	0.0537
49.6	0.0511	0.0511	0.0511
49.8	0.0506	0.0506	0.0506
50	0.0481	0.0481	0.0481
50.2	0.0477	0.0477	0.0477
50.4	0.0452	0.0452	0.0452
50.6	0.0448	0.0448	0.0448
50.8	0.0424	0.0424	0.0424
51	0.0421	0.0421	0.0421
51.2	0.0397	0.0397	0.0397
51.4	0.0394	0.0394	0.0394
51.6	0.0371	0.0371	0.0371
51.8	0.0369	0.0369	0.0369
52	0.0347	0.0347	0.0347
52.2	0.0345	0.0345	0.0345
52.4	0.0323	0.0323	0.0323
52.6	0.0321	0.0321	0.0321
52.8	0.03	0.03	0.03
53	0.0299	0.0299	0.0299
53.2	0.0278	0.0278	0.0278
53.4	0.0277	0.0277	0.0277
53.6	0.0257	0.0257	0.0257
53.8	0.0256	0.0256	0.0256
54	0.0237	0.0237	0.0237
54.2	0.0236	0.0236	0.0236
54.4	0.0217	0.0217	0.0217
54.6	0.0217	0.0217	0.0217
54.8	0.0199	0.0199	0.0199
55	0.0199	0.0199	0.0199
55.2	0.0181	0.0181	0.0181
55.4	0.0181	0.0181	0.0181
55.6	0.0164	0.0164	0.0164
55.8	0.0164	0.0164	0.0164
56	0.0147	0.0147	0.0147
56.2	0.0148	0.0148	0.0148
56.4	0.0131	0.0131	0.0131
56.6	0.0133	0.0133	0.0133
56.8	0.0116	0.0116	0.0116
57	0.0118	0.0118	0.0118
57.2	0.0102	0.0102	0.0102
57.4	0.0104	0.0104	0.0104
57.6	0.0088	0.0088	0.0088
57.8	0.009	0.009	0.009
58	0.0075	0.0075	0.0075
58.2	0.0077	0.0077	0.0077
58.4	0.0062	0.0062	0.0062
58.6	0.0065	0.0065	0.0065
58.8	0.005	0.005	0.005
59	0.0053	0.0053	0.0053
59.2	0.0039	0.0039	0.0039
59.4	0.0041	0.0041	0.0041
59.6	0.0028	0.0028	0.0028
59.8	0.0031	0.0031	0.0031
60	0.0017	0.0017	0.0017
60.2	0.002	0.002	0.002
60.4	0.0007	0.0007	0.0007
60.6	0.001	0.001	0.001
60.8	-0.0002	-0.0002	-0.0002
61	0.0001	0.0001	0.0001
61.2	-0.0011	-0.0011	-0.0011
61.4	-0.0008	-0.0008	-0.0008
61.6	-0.002	-0.002	-0.002
61.8	-0.0017	-0.0017	-0.0017
62	-0.0028	-0.0028	-0.0028
62.2	-0.0025	-0.0025	-0.0025
62.4	-0.0036	-0.0036	-0.0036
62.6	-0.0032	-0.0032	-0.0032
62.8	-0.0043	-0.0043	-0.0043
63	-0.004	-0.004	-0.004
63.2	-0.005	-0.005	-0.005
63.4	-0.0047	-0.0047	-0.0047
63.6	-0.0057	-0.0057	-0.0057
63.8	-0.0053	-0.0053	-0.0053
64	-0.0064	-0.0064	-0.0064
64.2	-0.0059	-0.0059	-0.0059
64.4	-0.007	-0.007	-0.007
64.6	-0.0065	-0.0065	-0.0065
64.8	-0.0075	-0.0075	-0.0075
65	-0.0071	-0.0071	-0.0071
65.2	-0.0081	-0.0081	-0.0081
65.4	-0.0076	-0.0076	-0.0076
65.6	-0.0086	-0.0086	-0.0086
65.8	-0.0081	-0.0081	-0.0081
66	-0.009	-0.009	-0.009
66.2	-0.0086	-0.0086	-0.0086
66.4	-0.0095	-0.0095	-0.0095
66.6	-0.009	-0.009	-0.009
66.8	-0.0099	-0.0099	-0.0099
67	-0.0095	-0.0095	-0.0095
67.2	-0.0103	-0.0103	-0.0103
67.4	-0.0099	-0.0099	-0.0099
67.6	-0.0107	-0.0107	-0.0107
67.8	-0.0102	-0.0102	-0.0102
68	-0.011	-0.011	-0.011
68.2	-0.0106	-0.0106	-0.0106
68.4	-0.0114	-0.0114	-0.0114
68.6	-0.0109	-0.0109	-0.0109
68.8	-0.0117	-0.0117	-0.0117
69	-0.0112	-0.0112	-0.0112
69.2	-0.012	-0.012	-0.012
69.4	-0.0115	-0.0115	-0.0115
69.6	-0.0122	-0.0122	-0.0122
69.8	-0.0117	-0.0117	-0.0117
70	-0.0125	-0.0125	-0.0125
70.2	-0.012	-0.012	-0.012
70.4	-0.0127	-0.0127	-0.0127
70.6	-0.0122	-0.0122	-0.0122
70.8	-0.0129	-0.0129	-0.0129
71	-0.0124	-0.0124	-0.0124
71.2	-0.0131	-0.0131	-0.0131
71.4	-0.0126	-0.0126	-0.0126
71.6	-0.0133	-0.0133	-0.0133
71.8	-0.0128	-0.0128	-0.0128
72	-0.0134	-0.0134	-0.0134
72.2	-0.0129	-0.0129	-0.0129
72.4	-0.0136	-0.0136	-0.0136
72.6	-0.0131	-0.0131	-0.0131
72.8	-0.0137	-0.0137	-0.0137
73	-0.0132	-0.0132	-0.0132
73.2	-0.0138	-0.0138	-0.0138
73.4	-0.0133	-0.0133	-0.0133
73.6	-0.0139	-0.0139	-0.0139
73.8	-0.0134	-0.0134	-0.0134
74	-0.014	-0.014	-0.014
74.2	-0.0135	-0.0135	-0.0135
74.4	-0.0141	-0.0141	-0.0141
74.6	-0.0136	-0.0136	-0.0136
74.8	-0.0142	-0.0142	-0.0142
75	-0.0137	-0.0137	-0.0137
75.2	-0.0142	-0.0142	-0.0142
75.4	-0.0137	-0.0137	-0.0137
75.6	-0.0143	-0.0143	-0.0143
75.8	-0.0138	-0.0138	-0.0138
76	-0.0143	-0.0143	-0.0143
76.2	-0.0138	-0.0138	-0.0138
76.4	-0.0143	-0.0143	-0.0143
76.6	-0.0138	-0.0138	-0.0138
76.8	-0.0143	-0.0143	-0.0143
77	-0.0138	-0.0138	-0.0138
77.2	-0.0143	-0.0143	-0.0143
77.4	-0.0138	-0.0138	-0.0138
77.6	-0.0143	-0.0143	-0.0143
77.8	-0.0139	-0.0139	-0.0139
78	-0.0143	-0.0143	-0.0143
78.2	-0.0138	-0.0138	-0.0138
78.4	-0.0143	-0.0143	-0.0143
78.6	-0.0138	-0.0138	-0.0138
78.8	-0.0143	-0.0143	-0.0143
79	-0.0138	-0.0138	-0.0138
79.2	-0.0143	-0.0143	-0.0143
79.4	-0.0138	-0.0138	-0.0138
79.6	-0.0142	-0.0142	-0.0142
79.8	-0.0137	-0.0137	-0.0137
80	-0.0142	-0.0142	-0.0142
80.2	-0.0137	-0.0137	-0.0137
80.4	-0.0141	-0.0141	-0.0141
80.6	-0.0137	-0.0137	-0.0137
80.8	-0.0141	-0.0141	-0.0141
81	-0.0136	-0.0136	-0.0136
81.2	-0.014	-0.014	-0.014
81.4	-0.0136	-0.0136	-0.0136
81.6	-0.014	-0.014	-0.014
81.8	-0.0135	-0.0135	-0.0135
82	-0.0139	-0.0139	-0.0139
82.2	-0.0134	-0.0134	-0.0134
82.4	-0.0138	-0.0138	-0.0138
82.6	-0.0134	-0.0134	-0.0134
82.8	-0.0138	-0.0138	-0.0138
83	-0.0133	-0.0133	-0.0133
83.2	-0.0137	-0.0137	-0.0137
83.4	-0.0132	-0.0132	-0.0132
83.6	-0.0136	-0.0136	-0.0136
83.8	-0.0131	-0.0131	-0.0131
84	-0.0135	-0.0135	-0.0135
84.2	-0.013	-0.013	-0.013
84.4	-0.0134	-0.0134	-0.0134
84.6	-0.013	-0.013	-0.013
84.8	-0.0133	-0.0133	-0.0133
85	-0.0129	-0.0129	-0.0129
85.2	-0.0132	-0.0132	-0.0132
85.4	-0.0128	-0.0128	-0.0128
85.6	-0.0131	-0.0131	-0.0131
85.8	-0.0127	-0.0127	-0.0127
86	-0.013	-0.013	-0.013
86.2	-0.0126	-0.0126	-0.0126
86.4	-0.0129	-0.0129	-0.0129
86.6	-0.0125	-0.0125	-0.0125
86.8	-0.0128	-0.0128	-0.0128
87	-0.0124	-0.0124	-0.0124
87.2	-0.0127	-0.0127	-0.0127
87.4	-0.0123	-0.0123	-0.0123
87.6	-0.0126	-0.0126	-0.0126
87.8	-0.0122	-0.0122	-0.0122
88	-0.0125	-0.0125	-0.0125
88.2	-0.0121	-0.0121	-0.0121
88.4	-0.0124	-0.0124	-0.0124
88.6	-0.012	-0.012	-0.012
88.8	-0.0123	-0.0123	-0.0123
89	-0.0118	-0.0118	-0.0118
89.2	-0.0121	-0.0121	-0.0121
89.4	-0.0117	-0.0117	-0.0117
89.6	-0.012	-0.012	-0.012
89.8	-0.0116	-0.0116	-0.0116
90	-0.0119	-0.0119	-0.0119
90.2	-0.0115	-0.0115	-0.0115
90.4	-0.0118	-0.0118	-0.0118
90.6	-0.0114	-0.0114	-0.0114
90.8	-0.0117	-0.0117	-0.0117
91	-0.0113	-0.0113	-0.0113
91.2	-0.0116	-0.0116	-0.0116
91.4	-0.0112	-0.0112	-0.0112
91.6	-0.0114	-0.0114	-0.0114
91.8	-0.011	-0.011	-0.011
92	-0.0113	-0.0113	-0.0113
92.2	-0.0109	-0.0109	-0.0109
92.4	-0.0112	-0.0112	-0.0112
92.6	-0.0108	-0.0108	-0.0108
92.8	-0.0111	-0.0111	-0.0111
93	-0.0107	-0.0107	-0.0107
93.2	-0.011	-0.011	-0.011
93.4	-0.0106	-0.0106	-0.0106
93.6	-0.0108	-0.0108	-0.0108
93.8	-0.0105	-0.0105	-0.0105
94	-0.0107	-0.0107	-0.0107
94.2	-0.0103	-0.0103	-0.0103
94.4	-0.0106	-0.0106	-0.0106
94.6	-0.0102	-0.0102	-0.0102
94.8	-0.0105	-0.0105	-0.0105
95	-0.0101	-0.0101	-0.0101
95.2	-0.0103	-0.0103	-0.0103
95.4	-0.01	-0.01	-0.01
95.6	-0.0102	-0.0102	-0.0102
95.8	-0.0099	-0.0099	-0.0099
96	-0.0101	-0.0101	-0.0101
96.2	-0.0097	-0.0097	-0.0097
96.4	-0.01	-0.01	-0.01
96.6	-0.0096	-0.0096	-0.0096
96.8	-0.0099	-0.0099	-0.0099
97	-0.0095	-0.0095	-0.0095
97.2	-0.0097	-0.0097	-0.0097
97.4	-0.0094	-0.0094	-0.0094
97.6	-0.0096	-0.0096	-0.0096
97.8	-0.0093	-0.0093	-0.0093
98	-0.0095	-0.0095	-0.0095
98.2	-0.0092	-0.0092	-0.0092
98.4	-0.0094	-0.0094	-0.0094
98.6	-0.0091	-0.0091	-0.0091
98.8	-0.0093	-0.0093	-0.0093
99	-0.0089	-0.0089	-0.0089
99.2	-0.0092	-0.0092	-0.0092
99.4	-0.0088	-0.0088	-0.0088
99.6	-0.009	-0.009	-0.009
99.8	-0.0087	-0.0087	-0.0087
100	-0.0089	-0.0089	-0.0089
100.2	-0.0086	-0.0086	-0.0086
100.4	-0.0088	-0.0088	-0.0088
100.6	-0.0085	-0.0085	-0.0085
100.8	-0.0087	-0.0087	-0.0087
101	-0.0084	-0.0084	-0.0084
101.2	-0.0086	-0.0086	-0.0086
101.4	-0.0083	-0.0083	-0.0083
101.6	-0.0085	-0.0085	-0.0085
101.8	-0.0082	-0.0082	-0.0082
102	-0.0084	-0.0084	-0.0084
102.2	-0.008	-0.008	-0.008
102.4	-0.0082	-0.0082	-0.0082
102.6	-0.0079	-0.0079	-0.0079
102.8	-0.0081	-0.0081	-0.0081
103	-0.0078	-0.0078	-0.0078
103.2	-0.008	-0.008	-0.008
103.4	-0.0077	-0.0077	-0.0077
103.6	-0.0079	-0.0079	-0.0079
103.8	-0.0076	-0.0076	-0.0076
104	-0.0078	-0.0078	-0.0078
104.2	-0.0075	-0.0075	-0.0075
104.4	-0.0077	-0.0077	-0.0077
104.6	-0.0074	-0.0074	-0.0074
104.8	-0.0076	-0.0076	-0.0076
105	-0.0073	-0.0073	-0.0073
105.2	-0.0075	-0.0075	-0.0075
105.4	-0.0072	-0.0072	-0.0072
105.6	-0.0074	-0.0074	-0.0074
105.8	-0.0071	-0.0071	-0.0071
106	-0.0073	-0.0073	-0.0073
106.2	-0.007	-0.007	-0.007
106.4	-0.0072	-0.0072	-0.0072
106.6	-0.0069	-0.0069	-0.0069
106.8	-0.0071	-0.0071	-0.0071
107	-0.0068	-0.0068	-0.0068
107.2	-0.007	-0.007	-0.007
107.4	-0.0067	-0.0067	-0.0067
107.6	-0.0069	-0.0069	-0.0069
107.8	-0.0066	-0.0066	-0.0066
108	-0.0068	-0.0068	-0.0068
108.2	-0.0065	-0.0065	-0.0065
108.4	-0.0067	-0.0067	-0.0067
108.6	-0.0064	-0.0064	-0.0064
108.8	-0.0066	-0.0066	-0.0066
109	-0.0063	-0.0063	-0.0063
109.2	-0.0065	-0.0065	-0.0065
109.4	-0.0063	-0.0063	-0.0063
109.6	-0.0064	-0.0064	-0.0064
109.8	-0.0062	-0.0062	-0.0062
110	-0.0063	-0.0063	-0.0063
110.2	-0.0061	-0.0061	-0.0061
110.4	-0.0062	-0.0062	-0.0062
110.6	-0.006	-0.006	-0.006
110.8	-0.0061	-0.0061	-0.0061
111	-0.0059	-0.0059	-0.0059
111.2	-0.0061	-0.0061	-0.0061
111.4	-0.0058	-0.0058	-0.0058
111.6	-0.006	-0.006	-0.006
111.8	-0.0057	-0.0057	-0.0057
112	-0.0059	-0.0059	-0.0059
112.2	-0.0056	-0.0056	-0.0056
112.4	-0.0058	-0.0058	-0.0058
112.6	-0.0056	-0.0056	-0.0056
112.8	-0.0057	-0.0057	-0.0057
113	-0.0055	-0.0055	-0.0055
113.2	-0.0056	-0.0056	-0.0056
113.4	-0.0054	-0.0054	-0.0054
113.6	-0.0055	-0.0055	-0.0055
113.8	-0.0053	-0.0053	-0.0053
114	-0.0055	-0.0055	-0.0055
114.2	-0.0052	-0.0052	-0.0052
114.4	-0.0054	-0.0054	-0.0054
114.6	-0.0052	-0.0052	-0.0052
114.8	-0.0053	-0.0053	-0.0053
115	-0.0051	-0.0051	-0.0051
115.2	-0.0052	-0.0052	-0.0052
115.4	-0.005	-0.005	-0.005
115.6	-0.0051	-0.0051	-0.0051
115.8	-0.0049	-0.0049	-0.0049
116	-0.0051	-0.0051	-0.0051
116.2	-0.0048	-0.0048	-0.0048
116.4	-0.005	-0.005	-0.005
116.6	-0.0048	-0.0048	-0.0048
116.8	-0.0049	-0.0049	-0.0049
117	-0.0047	-0.0047	-0.0047
117.2	-0.0048	-0.0048	-0.0048
117.4	-0.0046	-0.0046	-0.0046
117.6	-0.0048	-0.0048	-0.0048
117.8	-0.0046	-0.0046	-0.0046
118	-0.0047	-0.0047	-0.0047
118.2	-0.0045	-0.0045	-0.0045
118.4	-0.0046	-0.0046	-0.0046
118.6	-0.0044	-0.0044	-0.0044
118.8	-0.0046	-0.0046	-0.0046
119	-0.0044	-0.0044	-0.0044
119.2	-0.0045	-0.0045	-0.0045
119.4	-0.0043	-0.0043	-0.0043
119.6	-0.0044	-0.0044	-0.0044
119.8	-0.0042	-0.0042	-0.0042
120	-0.0044	-0.0044	-0.0044
120.2	-0.0042	-0.0042	-0.0042
120.4	-0.0043	-0.0043	-0.0043
120.6	-0.0041	-0.0041	-0.0041
120.8	-0.0042	-0.0042	-0.0042
121	-0.004	-0.004	-0.004
121.2	-0.0042	-0.0042	-0.0042
121.4	-0.004	-0.004	-0.004
121.6	-0.0041	-0.0041	-0.0041
121.8	-0.0039	-0.0039	-0.0039
122	-0.004	-0.004	-0.004
122.2	-0.0038	-0.0038	-0.0038
122.4	-0.004	-0.004	-0.004
122.6	-0.0038	-0.0038	-0.0038
122.8	-0.0039	-0.0039	-0.0039
123	-0.0037	-0.0037	-0.0037
123.2	-0.0038	-0.0038	-0.0038
123.4	-0.0037	-0.0037	-0.0037
123.6	-0.0038	-0.0038	-0.0038
123.8	-0.0036	-0.0036	-0.0036
124	-0.0037	-0.0037	-0.0037
124.2	-0.0036	-0.0036	-0.0036
124.4	-0.0037	-0.0037	-0.0037
124.6	-0.0035	-0.0035	-0.0035
124.8	-0.0036	-0.0036	-0.0036
125	-0.0034	-0.0034	-0.0034
125.2	-0.0036	-0.0036	-0.0036
125.4	-0.0034	-0.0034	-0.0034
125.6	-0.0035	-0.0035	-0.0035
125.8	-0.0033	-0.0033	-0.0033
126	-0.0034	-0.0034	-0.0034
126.2	-0.0033	-0.0033	-0.0033
126.4	-0.0034	-0.0034	-0.0034
126.6	-0.0032	-0.0032	-0.0032
126.8	-0.0033	-0.0033	-0.0033
127	-0.0032	-0.0032	-0.0032
127.2	-0.0033	-0.0033	-0.0033
127.4	-0.0031	-0.0031	-0.0031
127.6	-0.0032	-0.0032	-0.0032
127.8	-0.0031	-0.0031	-0.0031
128	-0.0032	-0.0032	-0.0032
128.2	-0.003	-0.003	-0.003
128.4	-0.0031	-0.0031	-0.0031
128.6	-0.003	-0.003	-0.003
128.8	-0.0031	-0.0031	-0.0031
129	-0.0029	-0.0029	-0.0029
129.2	-0.003	-0.003	-0.003
129.4	-0.0029	-0.0029	-0.0029
129.6	-0.003	-0.003	-0.003
129.8	-0.0028	-0.0028	-0.0028
130	-0.0029	-0.0029	-0.0029
130.2	-0.0028	-0.0028	-0.0028
130.4	-0.0029	-0.0029	-0.0029
130.6	-0.0027	-0.0027	-0.0027
130.8	-0.0029	-0.0029	-0.0029
131	-0.0027	-0.0027	-0.0027
131.2	-0.0028	-0.0028	-0.0028
131.4	-0.0027	-0.0027	-0.0027
131.6	-0.0028	-0.0028	-0.0028
131.8	-0.0026	-0.0026	-0.0026
132	-0.0027	-0.0027	-0.0027
132.2	-0.0026	-0.0026	-0.0026
132.4	-0.0027	-0.0027	-0.0027
132.6	-0.0025	-0.0025	-0.0025
132.8	-0.0026	-0.0026	-0.0026
133	-0.0025	-0.0025	-0.0025
133.2	-0.0026	-0.0026	-0.0026
133.4	-0.0025	-0.0025	-0.0025
133.6	-0.0026	-0.0026	-0.0026
133.8	-0.0024	-0.0024	-0.0024
134	-0.0025	-0.0025	-0.0025
134.2	-0.0024	-0.0024	-0.0024
134.4	-0.0025	-0.0025	-0.0025
134.6	-0.0023	-0.0023	-0.0023
134.8	-0.0024	-0.0024	-0.0024
135	-0.0023	-0.0023	-0.0023
135.2	-0.0024	-0.0024	-0.0024
135.4	-0.0023	-0.0023	-0.0023
135.6	-0.0024	-0.0024	-0.0024
135.8	-0.0022	-0.0022	-0.0022
136	-0.0023	-0.0023	-0.0023
136.2	-0.0022	-0.0022	-0.0022
136.4	-0.0023	-0.0023	-0.0023
136.6	-0.0022	-0.0022	-0.0022
136.8	-0.0022	-0.0022	-0.0022
137	-0.0021	-0.0021	-0.0021
137.2	-0.0022	-0.0022	-0.0022
137.4	-0.0021	-0.0021	-0.0021
137.6	-0.0022	-0.0022	-0.0022
137.8	-0.0021	-0.0021	-0.0021
138	-0.0021	-0.0021	-0.0021
138.2	-0.002	-0.002	-0.002
138.4	-0.0021	-0.0021	-0.0021
138.6	-0.002	-0.002	-0.002
138.8	-0.0021	-0.0021	-0.0021
139	-0.002	-0.002	-0.002
139.2	-0.002	-0.002	-0.002
139.4	-0.0019	-0.0019	-0.0019
139.6	-0.002	-0.002	-0.002
139.8	-0.0019	-0.0019	-0.0019
140	-0.002	-0.002	-0.002
140.2	-0.0019	-0.0019	-0.0019
140.4	-0.0019	-0.0019	-0.0019
140.6	-0.0018	-0.0018	-0.0018
140.8	-0.0019	-0.0019	-0.0019
141	-0.0018	-0.0018	-0.0018
141.2	-0.0019	-0.0019	-0.0019
141.4	-0.0018	-0.0018	-0.0018
141.6	-0.0019	-0.0019	-0.0019
141.8	-0.0017	-0.0017	-0.0017
142	-0.0018	-0.0018	-0.0018
142.2	-0.0017	-0.0017	-0.0017
142.4	-0.0018	-0.0018	-0.0018
142.6	-0.0017	-0.0017	-0.0017
142.8	-0.0018	-0.0018	-0.0018
143	-0.0017	-0.0017	-0.0017
143.2	-0.0017	-0.0017	-0.0017
143.4	-0.0016	-0.0016	-0.0016
143.6	-0.0017	-0.0017	-0.0017
143.8	-0.0016	-0.0016	-0.0016
144	-0.0017	-0.0017	-0.0017
144.2	-0.0016	-0.0016	-0.0016
144.4	-0.0017	-0.0017	-0.0017
144.6	-0.0016	-0.0016	-0.0016
144.8	-0.0016	-0.0016	-0.0016
145	-0.0015	-0.0015	-0.0015
145.2	-0.0016	-0.0016	-0.0016
145.4	-0.0015	-0.0015	-0.0015
145.6	-0.0016	-0.0016	-0.0016
145.8	-0.0015	-0.0015	-0.0015
146	-0.0016	-0.0016	-0.0016
146.2	-0.0015	-0.0015	-0.0015
146.4	-0.0015	-0.0015	-0.0015
146.6	-0.0014	-0.0014	-0.0014
146.8	-0.0015	-0.0015	-0.0015
147	-0.0014	-0.0014	-0.0014
147.2	-0.0015	-0.0015	-0.0015
147.4	-0.0014	-0.0014	-0.0014
147.6	-0.0015	-0.0015	-0.0015
147.8	-0.0014	-0.0014	-0.0014
148	-0.0014	-0.0014	-0.0014
148.2	-0.0013	-0.0013	-0.0013
148.4	-0.0014	-0.0014	-0.0014
148.6	-0.0013	-0.0013	-0.0013
148.8	-0.0014	-0.0014	-0.0014
149	-0.0013	-0.0013	-0.0013
149.2	-0.0014	-0.0014	-0.0014
149.4	-0.0013	-0.0013	-0.0013
149.6	-0.0013	-0.0013	-0.0013
149.8	-0.0013	-0.0013	-0.0013
150	-0.0013	-0.0013	-0.0013
150.2	-0.0012	-0.0012	-0.0012
150.4	-0.0013	-0.0013	-0.0013
150.6	-0.0012	-0.0012	-0.0012
150.8	-0.0013	-0.0013	-0.0013
151	-0.0012	-0.0012	-0.0012
151.2	-0.0013	-0.0013	-0.0013
151.4	-0.0012	-0.0012	-0.0012
151.6	-0.0012	-0.0012	-0.0012
151.8	-0.0012	-0.0012	-0.0012
152	-0.0012	-0.0012	-0.0012
152.2	-0.0011	-0.0011	-0.0011
152.4	-0.0012	-0.0012	-0.0012
152.6	-0.0011	-0.0011	-0.0011
152.8	-0.0012	-0.0012	-0.0012
153	-0.0011	-0.0011	-0.0011
153.2	-0.0012	-0.0012	-0.0012
153.4	-0.0011	-0.0011	-0.0011
153.6	-0.0011	-0.0011	-0.0011
153.8	-0.0011	-0.0011	-0.0011
154	-0.0011	-0.0011	-0.0011
154.2	-0.001	-0.001	-0.001
154.4	-0.0011	-0.0011	-0.0011
154.6	-0.001	-0.001	-0.001
154.8	-0.0011	-0.0011	-0.0011
155	-0.001	-0.001	-0.001
155.2	-0.0011	-0.0011	-0.0011
155.4	-0.001	-0.001	-0.001
155.6	-0.0011	-0.0011	-0.0011
155.8	-0.001	-0.001	-0.001
156	-0.001	-0.001	-0.001
156.2	-0.001	-0.001	-0.001
156.4	-0.001	-0.001	-0.001
156.6	-0.0009	-0.0009	-0.0009
156.8	-0.001	-0.001	-0.001
157	-0.0009	-0.0009	-0.0009
157.2	-0.001	-0.001	-0.001
157.4	-0.0009	-0.0009	-0.0009
157.6	-0.001	-0.001	-0.001
157.8	-0.0009	-0.0009	-0.0009
158	-0.001	-0.001	-0.001
158.2	-0.0009	-0.0009	-0.0009
158.4	-0.0009	-0.0009	-0.0009
158.6	-0.0009	-0.0009	-0.0009
158.8	-0.0009	-0.0009	-0.0009
159	-0.0009	-0.0009	-0.0009
159.2	-0.0009	-0.0009	-0.0009
159.4	-0.0008	-0.0008	-0.0008
159.6	-0.0009	-0.0009	-0.0009
159.8	-0.0008	-0.0008	-0.0008
160	-0.0009	-0.0009	-0.0009
160.2	-0.0008	-0.0008	-0.0008
160.4	-0.0009	-0.0009	-0.0009
160.6	-0.0008	-0.0008	-0.0008
160.8	-0.0009	-0.0009	-0.0009
161	-0.0008	-0.0008	-0.0008
161.2	-0.0008	-0.0008	-0.0008
161.4	-0.0008	-0.0008	-0.0008
161.6	-0.0008	-0.0008	-0.0008
161.8	-0.0008	-0.0008	-0.0008
162	-0.0008	-0.0008	-0.0008
162.2	-0.0007	-0.0007	-0.0007
162.4	-0.0008	-0.0008	-0.0008
162.6	-0.0007	-0.0007	-0.0007
162.8	-0.0008	-0.0008	-0.0008
163	-0.0007	-0.0007	-0.0007
163.2	-0.0008	-0.0008	-0.0008
163.4	-0.0007	-0.0007	-0.0007
163.6	-0.0008	-0.0008	-0.0008
163.8	-0.0007	-0.0007	-0.0007
164	-0.0007	-0.0007	-0.0007
164.2	-0.0007	-0.0007	-0.0007
164.4	-0.0007	-0.0007	-0.0007
164.6	-0.0007	-0.0007	-0.0007
164.8	-0.0007	-0.0007	-0.0007
165	-0.0007	-0.0007	-0.0007
165.2	-0.0007	-0.0007	-0.0007
165.4	-0.0007	-0.0007	-0.0007
165.6	-0.0007	-0.0007	-0.0007
165.8	-0.0006	-0.0006	-0.0006
166	-0.0007	-0.0007	-0.0007
166.2	-0.0006	-0.0006	-0.0006
166.4	-0.0007	-0.0007	-0.0007
166.6	-0.0006	-0.0006	-0.0006
166.8	-0.0007	-0.0007	-0.0007
167	-0.0006	-0.0006	-0.0006
167.2	-0.0007	-0.0007	-0.0007
167.4	-0.0006	-0.0006	-0.0006
167.6	-0.0006	-0.0006	-0.0006
167.8	-0.0006	-0.0006	-0.0006
168	-0.0006	-0.0006	-0.0006
168.2	-0.0006	-0.0006	-0.0006
168.4	-0.0006	-0.0006	-0.0006
168.6	-0.0006	-0.0006	-0.0006
168.8	-0.0006	-0.0006	-0.0006
169	-0.0006	-0.0006	-0.0006
169.2	-0.0006	-0.0006	-0.0006
169.4	-0.0006	-0.0006	-0.0006
169.6	-0.0006	-0.0006	-0.0006
169.8	-0.0005	-0.0005	-0.0005
170	-0.0006	-0.0006	-0.0006
170.2	-0.0005	-0.0005	-0.0005
170.4	-0.0006	-0.0006	-0.0006
170.6	-0.0005	-0.0005	-0.0005
170.8	-0.0006	-0.0006	-0.0006
171	-0.0005	-0.0005	-0.0005
171.2	-0.0006	-0.0006	-0.0006
171.4	-0.0005	-0.0005	-0.0005
171.6	-0.0005	-0.0005	-0.0005
171.8	-0.0005	-0.0005	-0.0005
172	-0.0005	-0.0005	-0.0005
172.2	-0.0005	-0.0005	-0.0005
172.4	-0.0005	-0.0005	-0.0005
172.6	-0.0005	-0.0005	-0.0005
172.8	-0.0005	-0.0005	-0.0005
173	-0.0005	-0.0005	-0.0005
173.2	-0.0005	-0.0005	-0.0005
173.4	-0.0005	-0.0005	-0.0005
173.6	-0.0005	-0.0005	-0.0005
173.8	-0.0005	-0.0005	-0.0005
174	-0.0005	-0.0005	-0.0005
174.2	-0.0005	-0.0005	-0.0005
174.4	-0.0005	-0.0005	-0.0005
174.6	-0.0004	-0.0004	-0.0004
174.8	-0.0005	-0.0005	-0.0005
175	-0.0004	-0.0004	-0.0004
175.2	-0.0005	-0.0005	-0.0005
175.4	-0.0004	-0.0004	-0.0004
175.6	-0.0005	-0.0005	-0.0005
175.8	-0.0004	-0.0004	-0.0004
176	-0.0005	-0.0005	-0.0005
176.2	-0.0004	-0.0004	-0.0004
176.4	-0.0005	-0.0005	-0.0005
176.6	-0.0004	-0.0004	-0.0004
176.8	-0.0004	-0.0004	-0.0004
177	-0.0004	-0.0004	-0.0004
177.2	-0.0004	-0.0004	-0.0004
177.4	-0.0004	-0.0004	-0.0004
177.6	-0.0004	-0.0004	-0.0004
177.8	-0.0004	-0.0004	-0.0004
178	-0.0004	-0.0004	-0.0004
178.2	-0.0004	-0.0004	-0.0004
178.4	-0.0004	-0.0004	-0.0004
178.6	-0.0004	-0.0004	-0.0004
178.8	-0.0004	-0.0004	-0.0004
179	-0.0004	-0.0004	-0.0004
179.2	-0.0004	-0.0004	-0.0004
179.4	-0.0004	-0.0004	-0.0004
179.6	-0.0004	-0.0004	-0.0004
179.8	-0.0004	-0.0004	-0.0004
180	-0.0004	-0.0004	-0.0004
180.2	-0.0003	-0.0003	-0.0003
180.4	-0.0004	-0.0004	-0.0004
180.6	-0.0003	-0.0003	-0.0003
180.8	-0.0004	-0.0004	-0.0004
181	-0.0003	-0.0003	-0.0003
181.2	-0.0004	-0.0004	-0.0004
181.4	-0.0003	-0.0003	-0.0003
181.6	-0.0004	-0.0004	-0.0004
181.8	-0.0003	-0.0003	-0.0003
182	-0.0004	-0.0004	-0.0004
182.2	-0.0003	-0.0003	-0.0003
182.4	-0.0004	-0.0004	-0.0004
182.6	-0.0003	-0.0003	-0.0003
182.8	-0.0003	-0.0003	-0.0003
183	-0.0003	-0.0003	-0.0003
183.2	-0.0003	-0.0003	-0.0003
183.4	-0.0003	-0.0003	-0.0003
183.6	-0.0003	-0.0003	-0.0003
183.8	-0.0003	-0.0003	-0.0003
184	-0.0003	-0.0003	-0.0003
184.2	-0.0003	-0.0003	-0.0003
184.4	-0.0003	-0.0003	-0.0003
184.6	-0.0003	-0.0003	-0.0003
184.8	-0.0003	-0.0003	-0.0003
185	-0.0003	-0.0003	-0.0003
185.2	-0.0003	-0.0003	-0.0003
185.4	-0.0003	-0.0003	-0.0003
185.6	-0.0003	-0.0003	-0.0003
185.8	-0.0003	-0.0003	-0.0003
186	-0.0003	-0.0003	-0.0003
186.2	-0.0003	-0.0003	-0.0003
186.4	-0.0003	-0.0003	-0.0003
186.6	-0.0003	-0.0003	-0.0003
186.8	-0.0003	-0.0003	-0.0003
187	-0.0003	-0.0003	-0.0003
187.2	-0.0003	-0.0003	-0.0003
187.4	-0.0003	-0.0003	-0.0003
187.6	-0.0003	-0.0003	-0.0003
187.8	-0.0003	-0.0003	-0.0003
188	-0.0003	-0.0003	-0.0003
188.2	-0.0002	-0.0002	-0.0002
188.4	-0.0003	-0.0003	-0.0003
188.6	-0.0002	-0.0002	-0.0002
188.8	-0.0003	-0.0003	-0.0003
189	-0.0002	-0.0002	-0.0002
189.2	-0.0003	-0.0003	-0.0003
189.4	-0.0002	-0.0002	-0.0002
189.6	-0.0003	-0.0003	-0.0003
189.8	-0.0002	-0.0002	-0.0002
190	-0.0003	-0.0003	-0.0003
190.2	-0.0002	-0.0002	-0.0002
190.4	-0.0003	-0.0003	-0.0003
190.6	-0.0002	-0.0002	-0.0002
190.8	-0.0003	-0.0003	-0.0003
191	-0.0002	-0.0002	-0.0002
191.2	-0.0002	-0.0002	-0.0002
191.4	-0.0002	-0.0002	-0.0002
191.6	-0.0002	-0.0002	-0.0002
191.8	-0.0002	-0.0002	-0.0002
192	-0.0002	-0.0002	-0.0002
192.2	-0.0002	-0.0002	-0.0002
192.4	-0.0002	-0.0002	-0.0002
192.6	-0.0002	-0.0002	-0.0002
192.8	-0.0002	-0.0002	-0.0002
193	-0.0002	-0.0002	-0.0002
193.2	-0.0002	-0.0002	-0.0002
193.4	-0.0002	-0.0002	-0.0002
193.6	-0.0002	-0.0002	-0.0002
193.8	-0.0002	-0.0002	-0.0002
194	-0.0002	-0.0002	-0.0002
194.2	-0.0002	-0.0002	-0.0002
194.4	-0.0002	-0.0002	-0.0002
194.6	-0.0002	-0.0002	-0.0002
194.8	-0.0002	-0.0002	-0.0002
195	-0.0002	-0.0002	-0.0002
195.2	-0.0002	-0.0002	-0.0002
195.4	-0.0002	-0.0002	-0.0002
195.6	-0.0002	-0.0002	-0.0002
195.8	-0.0002	-0.0002	-0.0002
196	-0.0002	-0.0002	-0.0002
196.2	-0.0002	-0.0002	-0.0002
196.4	-0.0002	-0.0002	-0.0002
196.6	-0.0002	-0.0002	-0.0002
196.8	-0.0002	-0.0002	-0.0002
197	-0.0002	-0.0002	-0.0002
197.2	-0.0002	-0.0002	-0.0002
197.4	-0.0002	-0.0002	-0.0002
197.6	-0.0002	-0.0002	-0.0002
197.8	-0.0002	-0.0002	-0.0002
198	-0.0002	-0.0002	-0.0002
198.2	-0.0002	-0.0002	-0.0002
198.4	-0.0002	-0.0002	-0.0002
198.6	-0.0002	-0.0002	-0.0002
198.8	-0.0002	-0.0002	-0.0002
199	-0.0002	-0.0002	-0.0002
199.2	-0.0002	-0.0002	-0.0002
199.4	-0.0002	-0.0002	-0.0002
199.6	-0.0002	-0.0002	-0.0002
199.8	-0.0001	-0.0001	-0.0001
200	-0.0002	-0.0002	-0.0002
200.2	-0.0001	-0.0001	-0.0001
200.4	-0.0002	-0.0002	-0.0002
200.6	-0.0001	-0.0001	-0.0001
200.8	-0.0002	-0.0002	-0.0002
201	-0.0001	-0.0001	-0.0001
201.2	-0.0002	-0.0002	-0.0002
201.4	-0.0001	-0.0001	-0.0001
201.6	-0.0002	-0.0002	-0.0002
201.8	-0.0001	-0.0001	-0.0001
202	-0.0002	-0.0002	-0.0002
202.2	-0.0001	-0.0001	-0.0001
202.4	-0.0002	-0.0002	-0.0002
202.6	-0.0001	-0.0001	-0.0001
202.8	-0.0002	-0.0002	-0.0002
203	-0.0001	-0.0001	-0.0001
203.2	-0.0002	-0.0002	-0.0002
203.4	-0.0001	-0.0001	-0.0001
203.6	-0.0001	-0.0001	-0.0001
203.8	-0.0001	-0.0001	-0.0001
204	-0.0001	-0.0001	-0.0001
204.2	-0.0001	-0.0001	-0.0001
204.4	-0.0001	-0.0001	-0.0001
204.6	-0.0001	-0.0001	-0.0001
204.8	-0.0001	-0.0001	-0.0001
205	-0.0001	-0.0001	-0.0001
205.2	-0.0001	-0.0001	-0.0001
205.4	-0.0001	-0.0001	-0.0001
205.6	-0.0001	-0.0001	-0.0001
205.8	-0.0001	-0.0001	-0.0001
206	-0.0001	-0.0001	-0.0001
206.2	-0.0001	-0.0001	-0.0001
206.4	-0.0001	-0.0001	-0.0001
206.6	-0.0001	-0.0001	-0.0001
206.8	-0.0001	-0.0001	-0.0001
207	-0.0001	-0.0001	-0.0001
207.2	-0.0001	-0.0001	-0.0001
207.4	-0.0001	-0.0001	-0.0001
207.6	-0.0001	-0.0001	-0.0001
207.8	-0.0001	-0.0001	-0.0001
208	-0.0001	-0.0001	-0.0001
208.2	-0.0001	-0.0001	-0.0001
208.4	-0.0001	-0.0001	-0.0001
208.6	-0.0001	-0.0001	-0.0001
208.8	-0.0001	-0.0001	-0.0001
209	-0.0001	-0.0001	-0.0001
209.2	-0.0001	-0.0001	-0.0001
209.4	-0.0001	-0.0001	-0.0001
209.6	-0.0001	-0.0001	-0.0001
209.8	-0.0001	-0.0001	-0.0001
210	-0.0001	-0.0001	-0.0001
210.2	-0.0001	-0.0001	-0.0001
210.4	-0.0001	-0.0001	-0.0001
210.6	-0.0001	-0.0001	-0.0001
210.8	-0.0001	-0.0001	-0.0001
211	-0.0001	-0.0001	-0.0001
211.2	-0.0001	-0.0001	-0.0001
211.4	-0.0001	-0.0001	-0.0001
211.6	-0.0001	-0.0001	-0.0001
211.8	-0.0001	-0.0001	-0.0001
212	-0.0001	-0.0001	-0.0001
212.2	-0.0001	-0.0001	-0.0001
212.4	-0.0001	-0.0001	-0.0001
212.6	-0.0001	-0.0001	-0.0001
212.8	-0.0001	-0.0001	-0.0001
213	-0.0001	-0.0001	-0.0001
213.2	-0.0001	-0.0001	-0.0001
213.4	-0.0001	-0.0001	-0.0001
213.6	-0.0001	-0.0001	-0.0001
213.8	-0.0001	-0.0001	-0.0001
214	-0.0001	-0.0001	-0.0001
214.2	-0.0001	-0.0001	-0.0001
214.4	-0.0001	-0.0001	-0.0001
214.6	-0.0001	-0.0001	-0.0001
214.8	-0.0001	-0.0001	-0.0001
215	-0.0001	-0.0001	-0.0001
215.2	-0.0001	-0.0001	-0.0001
215.4	-0.0001	-0.0001	-0.0001
215.6	-0.0001	-0.0001	-0.0001
215.8	-0.0001	-0.0001	-0.0001
216	-0.0001	-0.0001	-0.0001
216.2	-0.0001	-0.0001	-0.0001
216.4	-0.0001	-0.0001	-0.0001
216.6	-0.0001	-0.0001	-0.0001
216.8	-0.0001	-0.0001	-0.0001
217	-0.0001	-0.0001	-0.0001
217.2	-0.0001	-0.0001	-0.0001
217.4	-0.0001	-0.0001	-0.0001
217.6	-0.0001	-0.0001	-0.0001
217.8	-0.0001	-0.0001	-0.0001
218	-0.0001	-0.0001	-0.0001
218.2	-0.0001	-0.0001	-0.0001
218.4	-0.0001	-0.0001	-0.0001
218.6	-0.0001	-0.0001	-0.0001
218.8	-0.0001	-0.0001	-0.0001
219	-0.0001	-0.0001	-0.0001
219.2	-0.0001	-0.0001	-0.0001
219.4	-0.0001	-0.0001	-0.0001
219.6	-0.0001	-0.0001	-0.0001
219.8	-0.0001	-0.0001	-0.0001
220	-0.0001	-0.0001	-0.0001
220.2	-0.0001	-0.0001	-0.0001
220.4	-0.0001	-0.0001	-0.0001
220.6	-0.0001	-0.0001	-0.0001
220.8	-0.0001	-0.0001	-0.0001
221	-0.0001	-0.0001	-0.0001
221.2	-0.0001	-0.0001	-0.0001
221.4	-0.0001	-0.0001	-0.0001
221.6	-0.0001	-0.0001	-0.0001
221.8	-0.0001	-0.0001	-0.0001
222	-0.0001	-0.0001	-0.0001
222.2	-0.0001	-0.0001	-0.0001
222.4	-0.0001	-0.0001	-0.0001
222.6	-0.0001	-0.0001	-0.0001
222.8	-0.0001	-0.0001	-0.0001
223	0	0	0
223.2	-0.0001	-0.0001	-0.0001
223.4	0	0	0
223.6	-0.0001	-0.0001	-0.0001
223.8	0	0	0
224	-0.0001	-0.0001	-0.0001
224.2	0	0	0
224.4	-0.0001	-0.0001	-0.0001
224.6	0	0	0
224.8	-0.0001	-0.0001	-0.0001
225	0	0	0
225.2	-0.0001	-0.0001	-0.0001
225.4	0	0	0
225.6	-0.0001	-0.0001	-0.0001
225.8	0	0	0
226	-0.0001	-0.0001	-0.0001
226.2	0	0	0
226.4	-0.0001	-0.0001	-0.0001
226.6	0	0	0
226.8	-0.0001	-0.0001	-0.0001
227	0	0	0
227.2	-0.0001	-0.0001	-0.0001
227.4	0	0	0
227.6	-0.0001	-0.0001	-0.0001
227.8	0	0	0
228	-0.0001	-0.0001	-0.0001
228.2	0	0	0
228.4	0	0	0
228.6	0	0	0
228.8	0	0	0
229	0	0	0
229.2	0	0	0
229.4	0	0	0
229.6	0	0	0
229.8	0	0	0
230	0	0	0
230.2	0	0	0
230.4	0	0	0
230.6	0	0	0
230.8	0	0	0
231	0	0	0
231.2	0	0	0
231.4	0	0	0
231.6	0	0	0
231.8	0	0	0
232	0	0	0
232.2	0	0	0
232.4	0	0	0
232.6	0	0	0
232.8	0	0	0
233	0	0	0
233.2	0	0	0
233.4	0	0	0
233.6	0	0	0
233.8	0	0	0
234	0	0	0
234.2	0	0	0
234.4	0	0	0
234.6	0	0	0
234.8	0	0	0
235	0	0	0
235.2	0	0	0
235.4	0	0	0
235.6	0	0	0
235.8	0	0	0
236	0	0	0
236.2	0	0	0
236.4	0	0	0
236.6	0	0	0
236.8	0	0	0
237	0	0	0
237.2	0	0	0
237.4	0	0	0
237.6	0	0	0
237.8	0	0	0
238	0	0	0
238.2	0	0	0
238.4	0	0	0
238.6	0	0	0
238.8	0	0	0
239	0	0	0
239.2	0	0	0
239.4	0	0	0
239.6	0	0	0
239.8	0	0	0
240	0	0	0
240.2	0	0	0
240.4	0	0	0
240.6	0	0	0
240.8	0	0	0
241	0	0	0
241.2	0	0	0
241.4	0	0	0
241.6	0	0	0
241.8	0	0	0
242	0	0	0
242.2	0	0	0
242.4	0	0	0
242.6	0	0	0
242.8	0	0	0
243	0	0	0
243.2	0	0	0
243.4	0	0	0
243.6	0	0	0
243.8	0	0	0
244	0	0	0
244.2	0	0	0
244.4	0	0	0
244.6	0	0	0
244.8	0	0	0
245	0	0	0
245.2	0	0	0
245.4	0	0	0
245.6	0	0	0
245.8	0	0	0
246	0	0	0
246.2	0	0	0
246.4	0	0	0
246.6	0	0	0
246.8	0	0	0
247	0	0	0
247.2	0	0	0
247.4	0	0	0
247.6	0	0	0
247.8	0	0	0
248	0	0	0
248.2	0	0	0
248.4	0	0	0
248.6	0	0	0
248.8	0	0	0
249	0	0	0
249.2	0	0	0
249.4	0	0	0
249.6	0	0	0
249.8	0	0	0
250	0	0	0
250.2	0	0	0
250.4	0	0	0
250.6	0	0	0
250.8	0	0	0
251	0	0	0
251.2	0	0	0
251.4	0	0	0
251.6	0	0	0
251.8	0	0	0
252	0	0	0
252.2	0	0	0
252.4	0	0	0
252.6	0	0	0
252.8	0	0	0
253	0	0	0
253.2	0	0	0
253.4	0	0	0
253.6	0	0	0
253.8	0	0	0
254	0	0	0
254.2	0	0	0
254.4	0	0	0
254.6	0	0	0
254.8	0	0	0
255	0	0	0
255.2	0	0	0
255.4	0	0	0
255.6	0	0	0
255.8	0	0	0
256	0	0	0
256.2	0	0	0
256.4	0	0	0
256.6	0	0	0
256.8	0	0	0
257	0	0	0
257.2	0	0	0
257.4	0	0	0
257.6	0	0	0
257.8	0	0	0
258	0	0	0
258.2	0	0	0
258.4	0	0	0
258.6	0	0	0
258.8	0	0	0
259	0	0	0
259.2	0	0	0
259.4	0	0	0
259.6	0	0	0
259.8	0	0	0
260	0	0	0
260.2	0	0	0
260.4	0	0	0
260.6	0	0	0
260.8	0	0	0
261	0	0	0
261.2	0	0	0
261.4	0	0	0
261.6	0	0	0
261.8	0	0	0
262	0	0	0
262.2	0	0	0
262.4	0	0	0
262.6	0	0	0
262.8	0	0	0
263	0	0	0
263.2	0	0	0
263.4	0	0	0
263.6	0	0	0
263.8	0	0	0
264	0	0	0
264.2	0	0	0
264.4	0	0	0
264.6	0	0	0
264.8	0	0	0
265	0	0	0
265.2	0	0	0
265.4	0	0	0
265.6	0	0	0
265.8	0	0	0
266	0	0	0
266.2	0	0	0
266.4	0	0	0
266.6	0	0	0
266.8	0	0	0
267	0	0	0
267.2	0	0	0
267.4	0	0	0
267.6	0	0	0
267.8	0	0	0
268	0	0	0
268.2	0	0	0
268.4	0	0	0
268.6	0	0	0
268.8	0	0	0
269	0	0	0
269.2	0	0	0
269.4	0	0	0
269.6	0	0	0
269.8	0	0	0
270	0	0	0
270.2	0	0	0
270.4	0	0	0
270.6	0	0	0
270.8	0	0	0
271	0	0	0
271.2	0	0	0
271.4	0	0	0
271.6	0	0	0
271.8	0	0	0
272	0	0	0
272.2	0	0	0
272.4	0	0	0
272.6	0	0	0
272.8	0	0	0
273	0	0	0
273.2	0	0	0
273.4	0	0	0
273.6	0	0	0
273.8	0	0	0
274	0	0	0
274.2	0	0	0
274.4	0	0	0
274.6	0	0	0
274.8	0	0	0
275	0	0	0
275.2	0	0	0
275.4	0	0	0
275.6	0	0	0
275.8	0	0	0
276	0	0	0
276.2	0	0	0
276.4	0	0	0
276.6	0	0	0
276.8	0	0	0
277	0	0	0
277.2	0	0	0
277.4	0	0	0
277.6	0	0	0
277.8	0	0	0
278	0	0	0
278.2	0	0	0
278.4	0	0	0
278.6	0	0	0
278.8	0	0	0
279	0	0	0
279.2	0	0	0
279.4	0	0	0
279.6	0	0	0
279.8	0	0	0
280	0	0	0
280.2	0	0	0
280.4	0	0	0
280.6	0	0	0
280.8	0	0	0
281	0	0	0
281.2	0	0	0
281.4	0	0	0
281.6	0	0	0
281.8	0	0	0
282	0	0	0
282.2	0	0	0
282.4	0	0	0
282.6	0	0	0
282.8	0	0	0
283	0	0	0
283.2	0	0	0
283.4	0	0	0
283.6	0	0	0
283.8	0	0	0
284	0	0	0
284.2	0	0	0
284.4	0	0	0
284.6	0	0	0
284.8	0	0	0
285	0	0	0
285.2	0	0	0
285.4	0	0	0
285.6	0	0	0
285.8	0	0	0
286	0	0	0
286.2	0	0	0
286.4	0	0	0
286.6	0	0	0
286.8	0	0	0
287	0	0	0
287.2	0	0	0
287.4	0	0	0
287.6	0	0	0
287.8	0	0	0
288	0	0	0
288.2	0	0	0
288.4	0	0	0
288.6	0	0	0
288.8	0	0	0
289	0	0	0
289.2	0	0	0
289.4	0	0	0
289.6	0	0	0
289.8	0	0	0
290	0	0	0
290.2	0	0	0
290.4	0	0	0
290.6	0	0	0
290.8	0	0	0
291	0	0	0
291.2	0	0	0
291.4	0	0	0
291.6	0	0	0
291.8	0	0	0
292	0	0	0
292.2	0	0	0
292.4	0	0	0
292.6	0	0	0
292.8	0	0	0
293	0	0	0
293.2	0	0	0
293.4	0	0	0
293.6	0	0	0
293.8	0	0	0
294	0	0	0
294.2	0	0	0
294.4	0	0	0
294.6	0	0	0
294.8	0	0	0
295	0	0	0
295.2	0	0	0
295.4	0	0	0
295.6	0	0	0
295.8	0	0	0
296	0	0	0
296.2	0	0	0
296.4	0	0	0
296.6	0	0	0
296.8	0	0	0
297	0	0	0
297.2	0	0	0
297.4	0	0	0
297.6	0	0	0
297.8	0	0	0
298	0	0	0
298.2	0	0	0
298.4	0	0	0
298.6	0	0	0
298.8	0	0	0
299	0	0	0
299.2	0	0	0
299.4	0	0	0
299.6	0	0	0
299.8	0	0	0
300	0	0	0
300.2	0	0	0
300.4	0	0	0
300.6	0.0372	0.0337	0.0266
300.8	0.1137	0.1105	0.0972
301	0.2155	0.2167	0.1971
301.2	0.3381	0.3474	0.3208
301.4	0.4732	0.4941	0.4611
301.6	0.617	0.6519	0.6117
301.8	0.7641	0.815	0.768
302	0.9122	0.9801	0.9258
302.2	1.0581	1.1435	1.0824
302.4	1.2005	1.3034	1.2353
302.6	1.3375	1.4578	1.3831
302.8	1.4688	1.6058	1.5246
303	1.5934	1.7465	1.6593
303.2	1.7114	1.8797	1.7867
303.4	1.8222	2.005	1.9068
303.6	1.9264	2.1228	2.0196
303.8	2.0235	2.2328	2.1253
304	2.1143	2.3355	2.224
304.2	2.1985	2.4311	2.3161
304.4	2.2768	2.5199	2.4017
304.6	2.3491	2.6021	2.4812
304.8	2.416	2.6783	2.5549
305	2.4774	2.7485	2.623
305.2	2.5341	2.8132	2.6859
305.4	2.5858	2.8725	2.7438
305.6	2.6332	2.927	2.797
305.8	2.6762	2.9766	2.8457
306	2.7153	3.0219	2.8901
306.2	2.7506	3.0629	2.9306
306.4	2.7823	3.0999	2.9672
306.6	2.8106	3.1331	3.0003
306.8	2.8357	3.1628	3.0299
307	2.8577	3.1891	3.0563
307.2	2.877	3.2122	3.0797
307.4	2.8934	3.2323	3.1001
307.6	2.9074	3.2495	3.1178
307.8	2.9189	3.264	3.1329
308	2.9282	3.2759	3.1454
308.2	2.9352	3.2854	3.1557
308.4	2.9402	3.2926	3.1637
308.6	2.9433	3.2976	3.1697
308.8	2.9446	3.3006	3.1736
309	2.9441	3.3016	3.1756
309.2	2.942	3.3007	3.1758
309.4	2.9383	3.2981	3.1743
309.6	2.9332	3.2939	3.1712
309.8	2.9267	3.288	3.1666
310	2.9189	3.2807	3.1605
310.2	2.9099	3.2719	3.1531
310.4	2.8997	3.2619	3.1444
310.6	2.8884	3.2506	3.1344
310.8	2.8761	3.2381	3.1232
311	2.8629	3.2244	3.111
311.2	2.8487	3.2098	3.0977
311.4	2.8336	3.1941	3.0835
311.6	2.8178	3.1775	3.0683
311.8	2.8012	3.16	3.0523
312	2.7839	3.1416	3.0354
312.2	2.7659	3.1225	3.0178
312.4	2.7473	3.1027	2.9994
312.6	2.7281	3.0822	2.9804
312.8	2.7084	3.061	2.9607
313	2.6881	3.0392	2.9404
313.2	2.6674	3.0169	2.9195
313.4	2.6463	2.994	2.8982
313.6	2.6248	2.9707	2.8763
313.8	2.6029	2.9469	2.854
314	2.5806	2.9227	2.8313
314.2	2.5581	2.8981	2.8082
314.4	2.5352	2.8732	2.7847
314.6	2.5121	2.8479	2.7609
314.8	2.4888	2.8223	2.7367
315	2.4652	2.7965	2.7123
315.2	2.4414	2.7704	2.6877
315.4	2.4175	2.7441	2.6628
315.6	2.3934	2.7175	2.6377
315.8	2.3692	2.6909	2.6124
316	2.3449	2.664	2.587
316.2	2.3205	2.637	2.5614
316.4	2.296	2.6099	2.5356
316.6	2.2715	2.5827	2.5098
316.8	2.2469	2.5554	2.4839
317	2.2222	2.5281	2.4579
317.2	2.1976	2.5007	2.4318
317.4	2.1729	2.4733	2.4057
317.6	2.1482	2.4458	2.3796
317.8	2.1236	2.4184	2.3534
318	2.099	2.3909	2.3272
318.2	2.0744	2.3635	2.3011
318.4	2.0499	2.3361	2.2749
318.6	2.0254	2.3088	2.2488
318.8	2.001	2.2815	2.2227
319	1.9767	2.2543	2.1967
319.2	1.9525	2.2271	2.1707
319.4	1.9283	2.2	2.1448
319.6	1.9043	2.1731	2.119
319.8	1.8803	2.1462	2.0933
320	1.8565	2.1194	2.0676
320.2	1.8328	2.0927	2.0421
320.4	1.8092	2.0662	2.0167
320.6	1.7857	2.0398	1.9913
320.8	1.7624	2.0135	1.9661
321	1.7392	1.9874	1.941
321.2	1.7162	1.9614	1.9161
321.4	1.6933	1.9356	1.8913
321.6	1.6705	1.9099	1.8666
321.8	1.6479	1.8843	1.8421
322	1.6255	1.859	1.8177
322.2	1.6032	1.8338	1.7935
322.4	1.5811	1.8088	1.7694
322.6	1.5592	1.7839	1.7455
322.8	1.5375	1.7593	1.7217
323	1.5159	1.7348	1.6982
323.2	1.4945	1.7105	1.6748
323.4	1.4732	1.6864	1.6515
323.6	1.4522	1.6625	1.6285
323.8	1.4313	1.6388	1.6056
324	1.4106	1.6152	1.5829
324.2	1.3901	1.5919	1.5604
324.4	1.3698	1.5688	1.5381
324.6	1.3496	1.5458	1.5159
324.8	1.3297	1.5231	1.494
325	1.3099	1.5006	1.4722
325.2	1.2903	1.4782	1.4506
325.4	1.2709	1.4561	1.4292
325.6	1.2518	1.4342	1.408
325.8	1.2327	1.4125	1.387
326	1.2139	1.391	1.3662
326.2	1.1953	1.3697	1.3456
326.4	1.1769	1.3486	1.3252
326.6	1.1586	1.3277	1.305
326.8	1.1406	1.3071	1.2849
327	1.1227	1.2866	1.2651
327.2	1.105	1.2663	1.2455
327.4	1.0876	1.2463	1.226
327.6	1.0703	1.2265	1.2068
327.8	1.0532	1.2068	1.1877
328	1.0363	1.1874	1.1689
328.2	1.0195	1.1682	1.1502
328.4	1.003	1.1492	1.1318
328.6	0.9867	1.1304	1.1135
328.8	0.9705	1.1118	1.0954
329	0.9545	1.0934	1.0776
329.2	0.9387	1.0752	1.0599
329.4	0.9231	1.0572	1.0424
329.6	0.9077	1.0395	1.0251
329.8	0.8925	1.0219	1.008
330	0.8774	1.0045	0.9911
330.2	0.8625	0.9874	0.9744
330.4	0.8478	0.9704	0.9578
330.6	0.8333	0.9536	0.9415
330.8	0.819	0.937	0.9253
331	0.8048	0.9207	0.9094
331.2	0.7908	0.9045	0.8936
331.4	0.777	0.8885	0.878
331.6	0.7633	0.8727	0.8626
331.8	0.7499	0.8571	0.8474
332	0.7366	0.8417	0.8323
332.2	0.7234	0.8265	0.8175
332.4	0.7105	0.8115	0.8028
332.6	0.6977	0.7966	0.7883
332.8	0.685	0.782	0.7739
333	0.6726	0.7675	0.7598
333.2	0.6603	0.7533	0.7458
333.4	0.6481	0.7392	0.732
333.6	0.6361	0.7252	0.7184
333.8	0.6243	0.7115	0.705
334	0.6127	0.698	0.6917
334.2	0.6012	0.6846	0.6786
334.4	0.5898	0.6714	0.6656
334.6	0.5786	0.6584	0.6529
334.8	0.5676	0.6455	0.6403
335	0.5567	0.6328	0.6278
335.2	0.5459	0.6203	0.6155
335.4	0.5353	0.608	0.6034
335.6	0.5249	0.5958	0.5915
335.8	0.5146	0.5838	0.5797
336	0.5044	0.5719	0.568
336.2	0.4944	0.5603	0.5566
336.4	0.4845	0.5488	0.5452
336.6	0.4748	0.5374	0.5341
336.8	0.4652	0.5262	0.5231
337	0.4558	0.5152	0.5122
337.2	0.4464	0.5043	0.5015
337.4	0.4373	0.4935	0.4909
337.6	0.4282	0.483	0.4805
337.8	0.4193	0.4726	0.4702
338	0.4105	0.4623	0.4601
338.2	0.4018	0.4522	0.4501
338.4	0.3933	0.4422	0.4403
338.6	0.3849	0.4323	0.4306
338.8	0.3766	0.4227	0.421
339	0.3685	0.4131	0.4116
339.2	0.3604	0.4037	0.4023
339.4	0.3525	0.3945	0.3932
339.6	0.3447	0.3853	0.3841
339.8	0.337	0.3763	0.3753
340	0.3295	0.3675	0.3665
340.2	0.322	0.3588	0.3579
340.4	0.3147	0.3502	0.3494
340.6	0.3075	0.3418	0.341
340.8	0.3004	0.3334	0.3328
341	0.2934	0.3252	0.3247
341.2	0.2865	0.3172	0.3167
341.4	0.2798	0.3092	0.3088
341.6	0.2731	0.3014	0.3011
341.8	0.2665	0.2937	0.2934
342	0.2601	0.2862	0.2859
342.2	0.2537	0.2787	0.2785
342.4	0.2475	0.2714	0.2713
342.6	0.2413	0.2642	0.2641
342.8	0.2353	0.2571	0.2571
343	0.2293	0.2501	0.2501
343.2	0.2235	0.2432	0.2433
343.4	0.2177	0.2365	0.2366
343.6	0.212	0.2298	0.23
343.8	0.2065	0.2233	0.2235
344	0.201	0.2169	0.2171
344.2	0.1956	0.2105	0.2108
344.4	0.1903	0.2043	0.2046
344.6	0.1851	0.1982	0.1985
344.8	0.1799	0.1922	0.1925
345	0.1749	0.1863	0.1866
345.2	0.17	0.1805	0.1808
345.4	0.1651	0.1748	0.1751
345.6	0.1603	0.1692	0.1695
345.8	0.1556	0.1637	0.164
346	0.151	0.1582	0.1586
346.2	0.1464	0.1529	0.1533
346.4	0.142	0.1477	0.1481
346.6	0.1376	0.1425	0.1429
346.8	0.1333	0.1375	0.1379
347	0.129	0.1325	0.1329
347.2	0.1249	0.1277	0.1281
347.4	0.1208	0.1229	0.1233
347.6	0.1168	0.1182	0.1186
347.8	0.1128	0.1136	0.114
348	0.109	0.1091	0.1094
348.2	0.1052	0.1046	0.105
348.4	0.1014	0.1003	0.1006
348.6	0.0978	0.096	0.0963
348.8	0.0942	0.0918	0.0921
349	0.0907	0.0876	0.088
349.2	0.0872	0.0836	0.0839
349.4	0.0838	0.0796	0.0799
349.6	0.0805	0.0757	0.076
349.8	0.0772	0.0719	0.0721
350	0.074	0.0682	0.0684
350.2	0.0708	0.0645	0.0647
350.4	0.0677	0.0609	0.0611
350.6	0.1434	0.1313	0.1089
350.8	0.2996	0.2779	0.2339
351	0.5076	0.4711	0.4039
351.2	0.7572	0.7014	0.6097
351.4	1.0305	0.9516	0.8363
351.6	1.319	1.2146	1.0744
351.8	1.6111	1.4798	1.3166
352	1.902	1.7434	1.5566
352.2	2.1847	1.9992	1.7908
352.4	2.4573	2.2458	2.016
352.6	2.7159	2.4798	2.2309
352.8	2.9606	2.7014	2.434
353	3.1896	2.9091	2.6252
353.2	3.404	3.1036	2.8042
353.4	3.6031	3.2844	2.9713
353.6	3.7884	3.4527	3.1267
353.8	3.9596	3.6082	3.2711
354	4.1184	3.7524	3.4049
354.2	4.2647	3.8852	3.5287
354.4	4.3999	4.0078	3.643
354.6	4.5242	4.1203	3.7485
354.8	4.6388	4.2239	3.8455
355	4.7438	4.3187	3.9348
355.2	4.8404	4.4056	4.0166
355.4	4.9286	4.4847	4.0915
355.6	5.0094	4.557	4.1598
355.8	5.0828	4.6224	4.2221
356	5.1498	4.6817	4.2785
356.2	5.2102	4.735	4.3296
356.4	5.265	4.783	4.3755
356.6	5.314	4.8257	4.4166
356.8	5.3579	4.8636	4.4532
357	5.3967	4.8968	4.4855
357.2	5.431	4.9258	4.5138
357.4	5.4608	4.9507	4.5382
357.6	5.4865	4.9717	4.559
357.8	5.5082	4.9891	4.5765
358	5.5263	5.003	4.5906
358.2	5.5407	5.0137	4.6018
358.4	5.5518	5.0213	4.61
358.6	5.5597	5.026	4.6155
358.8	5.5646	5.0279	4.6184
359	5.5666	5.0272	4.6188
359.2	5.566	5.0241	4.6169
359.4	5.5626	5.0185	4.6128
359.6	5.5569	5.0108	4.6066
359.8	5.5487	5.0009	4.5984
360	5.5384	4.9891	4.5883
360.2	5.526	4.9753	4.5765
360.4	5.5115	4.9598	4.5629
360.6	5.4951	4.9425	4.5478
360.8	5.477	4.9237	4.5311
361	5.457	4.9033	4.513
361.2	5.4355	4.8816	4.4936
361.4	5.4124	4.8584	4.4729
361.6	5.3878	4.834	4.4509
361.8	5.3618	4.8083	4.4279
362	5.3346	4.7816	4.4037
362.2	5.306	4.7537	4.3786
362.4	5.2763	4.7248	4.3525
362.6	5.2455	4.695	4.3254
362.8	5.2136	4.6643	4.2976
363	5.1808	4.6328	4.269
363.2	5.147	4.6005	4.2396
363.4	5.1123	4.5674	4.2095
363.6	5.0769	4.5337	4.1788
363.8	5.0406	4.4993	4.1475
364	5.0037	4.4644	4.1157
364.2	4.9661	4.4289	4.0833
364.4	4.9278	4.393	4.0504
364.6	4.889	4.3565	4.0171
364.8	4.8497	4.3196	3.9834
365	4.8099	4.2824	3.9494
365.2	4.7696	4.2448	3.915
365.4	4.7289	4.2069	3.8802
365.6	4.6879	4.1687	3.8452
365.8	4.6464	4.1302	3.81
366	4.6048	4.0915	3.7745
366.2	4.5628	4.0526	3.7389
366.4	4.5206	4.0136	3.7031
366.6	4.4781	3.9744	3.6671
366.8	4.4355	3.9351	3.631
367	4.3928	3.8956	3.5948
367.2	4.3499	3.8562	3.5585
367.4	4.3069	3.8166	3.5222
367.6	4.2638	3.7771	3.4858
367.8	4.2206	3.7374	3.4494
368	4.1775	3.6979	3.413
368.2	4.1342	3.6583	3.3766
368.4	4.0911	3.6188	3.3402
368.6	4.0479	3.5793	3.3039
368.8	4.0047	3.5399	3.2676
369	3.9616	3.5006	3.2314
369.2	3.9186	3.4614	3.1953
369.4	3.8757	3.4222	3.1592
369.6	3.8329	3.3832	3.1233
369.8	3.7901	3.3444	3.0875
370	3.7476	3.3057	3.0518
370.2	3.7051	3.2671	3.0162
370.4	3.6628	3.2287	2.9808
370.6	3.6207	3.1905	2.9455
370.8	3.5787	3.1524	2.9104
371	3.5369	3.1145	2.8754
371.2	3.4954	3.0769	2.8406
371.4	3.4539	3.0394	2.806
371.6	3.4128	3.0022	2.7716
371.8	3.3718	2.9651	2.7374
372	3.3311	2.9283	2.7034
372.2	3.2905	2.8917	2.6696
372.4	3.2503	2.8554	2.636
372.6	3.2102	2.8193	2.6026
372.8	3.1704	2.7834	2.5694
373	3.1309	2.7478	2.5365
373.2	3.0916	2.7124	2.5037
373.4	3.0526	2.6773	2.4713
373.6	3.0139	2.6425	2.439
373.8	2.9754	2.6079	2.407
374	2.9372	2.5735	2.3752
374.2	2.8992	2.5395	2.3436
374.4	2.8616	2.5057	2.3123
374.6	2.8242	2.4722	2.2813
374.8	2.7872	2.4389	2.2505
375	2.7503	2.4059	2.2199
375.2	2.7139	2.3732	2.1896
375.4	2.6776	2.3408	2.1596
375.6	2.6417	2.3087	2.1298
375.8	2.6061	2.2768	2.1002
376	2.5708	2.2452	2.071
376.2	2.5358	2.2139	2.0419
376.4	2.501	2.1829	2.0132
376.6	2.4666	2.1522	1.9847
376.8	2.4325	2.1217	1.9564
377	2.3987	2.0915	1.9284
377.2	2.3651	2.0617	1.9007
377.4	2.3319	2.032	1.8732
377.6	2.299	2.0027	1.846
377.8	2.2664	1.9737	1.819
378	2.2341	1.945	1.7924
378.2	2.2021	1.9165	1.7659
378.4	2.1704	1.8883	1.7397
378.6	2.1389	1.8604	1.7138
378.8	2.1078	1.8328	1.6882
379	2.077	1.8054	1.6628
379.2	2.0465	1.7784	1.6376
379.4	2.0163	1.7516	1.6128
379.6	1.9864	1.7251	1.5881
379.8	1.9568	1.6988	1.5638
380	1.9275	1.6729	1.5396
380.2	1.8985	1.6472	1.5158
380.4	1.8698	1.6218	1.4922
380.6	1.8413	1.5967	1.4688
380.8	1.8132	1.5718	1.4457
381	1.7854	1.5472	1.4228
381.2	1.7578	1.5229	1.4002
381.4	1.7306	1.4988	1.3778
381.6	1.7036	1.475	1.3557
381.8	1.6769	1.4515	1.3339
382	1.6505	1.4283	1.3122
382.2	1.6244	1.4053	1.2908
382.4	1.5986	1.3825	1.2697
382.6	1.573	1.3601	1.2488
382.8	1.5478	1.3378	1.2281
383	1.5228	1.3159	1.2077
383.2	1.4981	1.2942	1.1875
383.4	1.4737	1.2727	1.1675
383.6	1.4495	1.2515	1.1478
383.8	1.4256	1.2306	1.1283
384	1.402	1.2099	1.109
384.2	1.3787	1.1894	1.09
384.4	1.3556	1.1692	1.0712
384.6	1.3328	1.1492	1.0526
384.8	1.3103	1.1295	1.0343
385	1.288	1.11	1.0161
385.2	1.266	1.0908	0.9982
385.4	1.2442	1.0717	0.9805
385.6	1.2227	1.053	0.963
385.8	1.2015	1.0344	0.9458
386	1.1805	1.0161	0.9287
386.2	1.1597	0.998	0.9119
386.4	1.1393	0.9802	0.8952
386.6	1.119	0.9625	0.8788
386.8	1.099	0.9451	0.8626
387	1.0793	0.9279	0.8466
387.2	1.0598	0.911	0.8308
387.4	1.0405	0.8942	0.8152
387.6	1.0215	0.8777	0.7998
387.8	1.0027	0.8613	0.7846
388	0.9842	0.8453	0.7696
388.2	0.9659	0.8294	0.7548
388.4	0.9478	0.8137	0.7402
388.6	0.93	0.7982	0.7258
388.8	0.9124	0.7829	0.7116
389	0.895	0.7678	0.6976
389.2	0.8778	0.753	0.6837
389.4	0.8609	0.7383	0.6701
389.6	0.8441	0.7239	0.6566
389.8	0.8276	0.7096	0.6433
390	0.8114	0.6955	0.6302
390.2	0.7953	0.6816	0.6173
390.4	0.7795	0.6679	0.6045
390.6	0.7638	0.6544	0.5919
390.8	0.7484	0.6411	0.5795
391	0.7332	0.628	0.5673
391.2	0.7181	0.615	0.5553
391.4	0.7033	0.6023	0.5434
391.6	0.6887	0.5897	0.5317
391.8	0.6743	0.5773	0.5201
392	0.6601	0.565	0.5087
392.2	0.6461	0.553	0.4975
392.4	0.6323	0.5411	0.4864
392.6	0.6187	0.5294	0.4755
392.8	0.6052	0.5179	0.4648
393	0.592	0.5065	0.4542
393.2	0.579	0.4953	0.4438
393.4	0.5661	0.4842	0.4335
393.6	0.5534	0.4734	0.4234
393.8	0.5409	0.4626	0.4134
394	0.5286	0.4521	0.4036
394.2	0.5165	0.4417	0.3939
394.4	0.5045	0.4314	0.3843
394.6	0.4927	0.4213	0.3749
394.8	0.4811	0.4114	0.3657
395	0.4697	0.4016	0.3566
395.2	0.4584	0.392	0.3476
395.4	0.4473	0.3825	0.3388
395.6	0.4364	0.3731	0.3301
395.8	0.4256	0.3639	0.3215
396	0.415	0.3549	0.3131
396.2	0.4045	0.3459	0.3048
396.4	0.3943	0.3372	0.2966
396.6	0.3841	0.3285	0.2886
396.8	0.3742	0.32	0.2807
397	0.3643	0.3116	0.2729
397.2	0.3547	0.3034	0.2653
397.4	0.3452	0.2953	0.2577
397.6	0.3358	0.2873	0.2503
397.8	0.3266	0.2795	0.243
398	0.3175	0.2717	0.2358
398.2	0.3086	0.2641	0.2288
398.4	0.2998	0.2567	0.2218
398.6	0.2912	0.2493	0.215
398.8	0.2827	0.2421	0.2083
399	0.2743	0.235	0.2017
399.2	0.2661	0.228	0.1952
399.4	0.258	0.2211	0.1888
399.6	0.2501	0.2143	0.1825
399.8	0.2422	0.2077	0.1764
[truncated: 1,003 more rows]

## Sheet: Figure 4B
EPSP amplitude , mV =>								Paired-pulse ratio =>
X_Uniform Pr	Y_Uniform Pr	X_Pr trend	Y_Pr trend	X_ +density trend	Y_ +density trend			X_Uniform Pr	Y_Uniform Pr	X_Pr trend	Y_Pr trend	X_ +density trend	Y_ +density trend
1.94536	2.749	0.94536	3.362	2.98828	4.918			0.94536	2.29288	1.94536	0.73139	3.0032	1.05185
1.98678	3.697	0.98678	3.544	2.8607	3.548			0.98678	1.51072	1.98678	2.11902	3.03905	1.56567
2.04611	3.583	1.04611	3.072	3.16138	3.921			1.04611	1.62044	2.04611	1.06819	2.96675	1.19714
1.98058	2.278	0.98058	3.235	2.86426	3.293			0.98058	1.56195	1.98058	1.14029	3.13311	1.29396
2.05202	3.215	1.05202	1.941	2.97655	4.497			1.05202	3.04388	2.05202	1.13097	3.05021	1.22926
1.95555	3.528	0.95555	2.862	2.98619	2.521			0.95555	1.72674	1.95555	1.43916	3.1438	2.08727
2.00195	3.633	1.00195	3.802	3.11267	2.689			1.00195	1.79639	2.00195	1.38118	3.03414	1.45519
1.98362	3.318	0.98362	2.322	2.88718	3.391			0.98362	1.9441	1.98362	1.11842	2.95085	1.54527
1.99282	3.73	0.99282	2.729	2.97064	2.851			0.99282	2.60197	1.99282	2.64219	2.86503	1.51526
2.05022	3.302	1.05022	3.271	3.02317	3.755			1.05022	1.72151	2.05022	1.27567	3.00622	1.43222
2.01652	4.619	1.01652	3.367	2.93774	2.671			1.01652	2.25752	2.01652	1.52707	3.0292	1.95807
2.03	2.443	1.03	4.262	3.16055	2.714			1.03	1.57172	2.03	1.70648	3.03987	2.00368
1.84722	2.231	0.84722	3.224	2.97242	2.009			0.84722	2.02046	1.84722	1.31015	3.1136	2.21005
2.05365	4.449	1.05365	3.142	2.86451	2.631			1.05365	1.79764	2.05365	1.76459	2.91617	1.86507
2.03248	3.639	1.03248	2.933	2.89744	4.325			1.03248	2.10061	2.03248	1.73618	3.0267	1.39283
1.98414	3.17	0.98414	2.936	2.85832	3.237			0.98414	1.90804	1.98414	1.23758	2.93162	1.346
2.07621	3.099	1.07621	2.78	2.85881	2.378			1.07621	1.77092	2.07621	1.45826	2.99453	2.59125
1.98955	2.713	0.98955	3.315	3.00867	3.944			0.98955	1.11715	1.98955	1.17725	2.87456	1.10269
2.02788	4.318	1.02788	2.901	2.99685	3.31			1.02788	1.85587	2.02788	1.35511	2.96903	1.07372
1.93878	3.803	0.93878	4.302	2.88448	1.43			0.93878	1.77518	1.93878	1.38276	2.9344	2.98741
2.01221	2.442	1.01221	4.028	2.85553	2.16			1.01221	2.0177	2.01221	2.42904	2.9404	2.29861
2.04954	3.24	1.04954	2.389	2.95765	4.702			1.04954	2.72417	2.04954	1.71965	2.95269	0.93513
2.02827	3.096	1.02827	2.854	2.96387	3.156			1.02827	3.07692	2.02827	1.29169	2.90878	1.54214
2.03869	3.378	1.03869	3.517	2.99035	3.555			1.03869	1.41855	2.03869	2.06321	3.07064	0.64135
2.05062	2.516	1.05062	3.491	2.93822	2.923			1.05062	1.70393	2.05062	2.14309	2.87057	1.12727
1.93393	2.848	0.93393	2.284	2.95727	2.959			0.93393	1.48734	1.93393	1.63623	2.93243	1.81041
1.942	2.574	0.942	2.301	3.11429	4.751			0.942	2.907	1.942	1.66872	2.94187	0.93938
1.9373	2.859	0.9373	3.352	2.89118	3.03			0.9373	1.69195	1.9373	1.09183	2.91252	2.41221
2.03799	4.005	1.03799	3.42	3.1077	3.362			1.03799	1.37348	2.03799	2.00654	2.89838	1.25134
1.92808	3.079	0.92808	3.676	3.01539	3.143			0.92808	1.91394	1.92808	2.97517	2.84041	1.38944
1.97983	3.658	0.97983	2.695	2.87591	1.751			0.97983	2.35097	1.97983	1.48456	2.92716	2.23244
1.99397	3.175	0.99397	2.796	2.87693	3.977			0.99397	2.09886	1.99397	1.05386	2.85284	1.13729
2.12005	3.57	1.12005	3.502	3.07214	4.151			1.12005	2.65334	2.12005	1.86628	3.15405	1.19393
2.05226	3.057	1.05226	3.546	3.10297	3.008			1.05226	1.8056	2.05226	1.44372	3.10902	1.57779
1.95257	3.608	0.95257	2.773	2.8654	3.221			0.95257	2.75623	1.95257	2.14071	2.88119	1.41292
2.03698	2.867	1.03698	3.483	2.87146	2.522			1.03698	1.4399	2.03698	1.87323	2.86021	1.52617
2.08665	3.758	1.08665	2.723	3.0935	2.596			1.08665	1.431	2.08665	1.30104	2.88603	1.6822
1.9933	3.547	0.9933	2.886	2.8699	4.28			0.9933	1.75625	1.9933	1.54982	3.00554	1.17033
1.99679	3.748	0.99679	2.085	2.88237	4.397			0.99679	1.8561	1.99679	1.55952	3.10577	1.28292
2.07427	4.228	1.07427	3.358	3.00594	3.127			1.07427	1.89765	2.07427	1.1193	3.07839	1.43108
2.05611	4.465	1.05611	3.167	3.12009	2.766			1.05611	1.86712	2.05611	1.40567	3.08496	1.6645
1.94076	2.287	0.94076	3.851	3.05997	2.89			0.94076	2.26092	1.94076	1.40249	3.05458	1.65502
2.00554	2.774	1.00554	2.104	3.1113	3.205			1.00554	2.56184	2.00554	2.01606	2.92392	1.62465
1.96579	4.172	0.96579	2.574	3.11624	2.981			0.96579	1.96697	1.96579	1.5392	3.12055	1.95236
1.9815	3.438	0.9815	2.889	2.84647	3.85			0.9815	3.16667	1.9815	1.30611	2.979	1.49455
2.12428	3.477	1.12428	2.169	3.10775	3.215			1.12428	1.64947	2.12428	1.97907	2.94087	1.58134
2.04774	4.373	1.04774	3.411	2.96564	2.353			1.04774	2.02366	2.04774	1.52692	2.98057	2.13812
1.95273	2.626	0.95273	1.743	3.10982	2.784			0.95273	1.81328	1.95273	1.75852	2.85108	1.91272
1.9695	2.322	0.9695	3.457	3.12761	3.144			0.9695	1.9285	1.9695	1.29046	3.04053	1.08047
1.92022	3.638	0.92022	3.754	3.1157	2.67			0.92022	2.27875	1.92022	1.50794	3.04788	1.87491
2.02974	2.586	1.02974	2.688	2.98495	3.19			1.02974	1.63584	2.02974	1.68554	2.8471	1.06426
1.97429	3.605	0.97429	2.885	2.89491	3.705			0.97429	1.99326	1.97429	1.81777	2.85731	1.45533
1.94231	2.658	0.94231	2.483	3.11439	3.447			0.94231	1.61399	1.94231	1.60018	2.95714	1.39135
2.03711	3.779	1.03711	3.75	3.09528	3.192			1.03711	2.7357	2.03711	1.32624	2.94301	1.31642
2.11678	2.656	1.11678	2.249	2.97477	3.452			1.11678	1.86349	2.11678	1.6428	3.14123	1.15556
2.06051	4.022	1.06051	2.318	3.01923	3.74			1.06051	2.288	2.06051	1.85286	2.93398	1.0484
1.99764	2.757	0.99764	3.195	3.07836	2.81			0.99764	2.14532	1.99764	0.93186	3.13314	1.6548
1.99117	2.19	0.99117	2.518	2.94417	2.665			0.99117	1.03549	1.99117	1.52092	3.16038	1.12871
2.03632	3.983	1.03632	3.627	2.84335	3.54			1.03632	1.78546	2.03632	1.34171	2.86844	1.52571
2.03165	3.235	1.03165	3.092	2.84331	3.407			1.03165	2.15772	2.03165	1.51482	3.07906	1.33989
2.00567	2.828	1.00567	2.209	3.01514	3.429			1.00567	1.76766	2.00567	1.48512	2.91711	1.08661
1.93835	3.393	0.93835	2.483	3.10887	2.903			0.93835	1.597	1.93835	1.86447	2.85598	1.71133
1.98018	2.505	0.98018	2.755	3.04209	3.142			0.98018	2.14561	1.98018	1.48142	3.01148	1.54137
2.06468	3.865	1.06468	2.166	2.85217	3.802			1.06468	1.25971	2.06468	1.89745	2.84325	1.34666
2.0444	3.375	1.0444	2.348	2.92877	3.769			1.0444	1.73653	2.0444	1.33378	3.14755	1.17936
1.97948	4.063	0.97948	3.536	2.90184	3.614			0.97948	1.68097	1.97948	2.1093	2.90341	0.96818
2.06833	3.278	1.06833	2.023	2.99519	4.201			1.06833	3.76706	2.06833	2.1058	2.87199	0.9681
1.98618	3.398	0.98618	2.118	2.92561	1.956			0.98618	1.72988	1.98618	1.3811	2.97527	2.61503
2.02273	3.275	1.02273	3.581	3.10631	2.145			1.02273	2.23718	2.02273	1.79054	2.98261	1.96317
1.91002	3.992	0.91002	2.993	2.98298	4.05			0.91002	1.97681	1.91002	1.3565	2.90454	1.26469
2.02165	2.448	1.02165	2.923	2.92493	3.23			1.02165	1.82368	2.02165	1.30422	2.94163	1.14582
1.86551	3.564	0.86551	2.104	3.05128	3.071			0.86551	2.53997	1.86551	1.39387	3.12587	1.62455
2.05043	2.397	1.05043	3.585	2.9742	3.774			1.05043	1.90565	2.05043	1.72577	3.07405	1.11023
2.0232	2.288	1.0232	4.072	2.88837	3.131			1.0232	2.26125	2.0232	1.77859	3.12999	1.71095
2.02869	4.265	1.02869	2.484	2.89822	2.925			1.02869	1.82402	2.02869	0.97159	2.8732	1.00137
1.99462	3.68	0.99462	3.525	3.11819	3.075			0.99462	1.76203	1.99462	1.44154	2.9655	1.53171
2.07047	4.217	1.07047	2.231	2.97868	3.935			1.07047	1.45	2.07047	1.55748	2.97226	1.02999
2.06678	3.387	1.06678	3.493	3.08952	2.997			1.06678	2.14423	2.06678	1.87474	3.06034	1.44711
1.89278	3.086	0.89278	2.511	2.83337	2.612			0.89278	2.07943	1.89278	1.66604	2.95778	1.90888
1.96938	4.541	0.96938	2.494	3.15741	2.019			0.96938	2.12645	1.96938	1.5372	3.14796	2.5478
1.979	3.531	0.979	3.528	3.05141	3.686			0.979	1.29111	1.979	1.39645	2.8681	1.18719
2.0728	2.763	1.0728	2.631	3.06495	2.205			1.0728	1.74524	2.0728	1.3729	3.12245	2.47664
1.94838	3.031	0.94838	2.098	2.83731	3.655			0.94838	2.05658	1.94838	1.64977	3.10277	1.47962
1.9886	2.612	0.9886	2.599	3.08817	2.677			0.9886	1.80644	1.9886	1.18825	2.86123	1.84386
1.97096	3.442	0.97096	2.212	2.86918	3.09			0.97096	1.81256	1.97096	2.11877	2.87557	1.53107
2.02352	3.111	1.02352	2.415	2.86784	3.336			1.02352	2.78034	2.02352	1.30302	2.99334	1.13579
1.98325	2.652	0.98325	2.648	2.99401	3.327			0.98325	1.52929	1.98325	2.10325	2.85917	1.23565
2.0681	3.154	1.0681	2.412	2.99485	3.189			1.0681	2.11548	2.0681	1.55234	3.05029	1.50486
1.96532	2.673	0.96532	2.083	3.05312	4.803			0.96532	1.50238	1.96532	1.28012	3.12116	1.0254
2.02268	3.335	1.02268	2.205	3.01165	2.856			1.02268	2.10554	2.02268	1.54951	2.878	1.69748
2.15773	2.624	1.15773	2.803	2.95172	3.31			1.15773	1.46191	2.15773	1.43785	2.898	1.49909
2.05802	3.241	1.05802	1.921	2.93376	3.142			1.05802	1.78343	2.05802	1.81025	2.98688	1.29726
2.01084	3.784	1.01084	3.299	3.09327	2.578			1.01084	2.78667	2.01084	1.35269	3.11003	1.81924
2.00876	3.425	1.00876	2.725	3.00213	3.786			1.00876	1.7609	2.00876	1.73069	2.84596	1.43872
1.98832	2.603	0.98832	2.769	2.90484	2.641			0.98832	1.91439	1.98832	1.6521	3.01173	1.7323
1.92872	2.557	0.92872	2.495	2.93621	2.113			0.92872	1.97003	1.92872	1.99347	3.14229	2.31803
1.9596	3.053	0.9596	2.234	2.86289	3.873			0.9596	2.30333	1.9596	1.56827	2.92325	1.54764
2.06916	3.832	1.06916	2.9	2.9801	2.666			1.06916	1.51348	2.06916	1.24734	3.00494	1.28807
2.04018	2.933	1.04018	3.457	2.97158	3.166			1.04018	1.71867	2.04018	1.29139	3.04699	1.28522
2.03669		1.03669						1.03669		2.03669		3.08826

## Sheet: Figure 4C
Uniform Pr				Non-uniform Pr
Synaptic input frequency, Hz	Spiking frequency, Hz (mean)	Spiking frequency, Hz (SEM)		Spiking frequency, Hz (mean)	Spiking frequency, Hz (SEM)
5	0.695	0.09246		0.68	0.0798
10	1.12588	0.19395		1.28235	0.21358
15	1.99	0.2923		2.32	0.27271
20	2.955	0.39213		3.895	0.39813
30	5	0.55866		6.03	0.55195
40	5.96	0.75304		7.515	0.66417
50	7.815	0.82361		10.315	0.83343
60	10.355	1.11819		15.01	1.04113

## Sheet: Figure 4D
Short-term plasticity added
Uniform Pr				Non-uniform Pr
Synaptic input frequency, Hz	Spiking frequency, Hz (mean)	Spiking frequency, Hz (SEM)		Spiking frequency, Hz (mean)	Spiking frequency, Hz (SEM)
5	0.61	0.09134		0.725	0.0864
10	1.54676	0.23403		1.88353	0.21642
15	3.225	0.42554		3.815	0.38538
20	4.005	0.5387		4.985	0.47182
30	4.92	0.59989		6.28	0.5758
40	6.05	0.73998		7.55	0.69304
50	7.395	0.82541		10.425	0.87538
60	8.94	0.97486		12.53	0.9278

## Sheet: Supplement 1A
X_Time, ms	Y_Uniform	Y_Slope trend
0	-64.8636	-64.8636
0.2	-64.8636	-64.8636
0.4	-64.8635	-64.8635
0.6	-64.8636	-64.8636
0.8	-64.8635	-64.8635
1	-64.8636	-64.8636
1.2	-64.8635	-64.8635
1.4	-64.8636	-64.8636
1.6	-64.8635	-64.8635
1.8	-64.8636	-64.8636
2	-64.8635	-64.8635
2.2	-64.8636	-64.8636
2.4	-64.8635	-64.8635
2.6	-64.8636	-64.8636
2.8	-64.8635	-64.8635
3	-64.8636	-64.8636
3.2	-64.8635	-64.8635
3.4	-64.8636	-64.8636
3.6	-64.8635	-64.8635
3.8	-64.8635	-64.8635
4	-64.8635	-64.8635
4.2	-64.8635	-64.8635
4.4	-64.8635	-64.8635
4.6	-64.8635	-64.8635
4.8	-64.8635	-64.8635
5	-64.8635	-64.8635
5.2	-64.8635	-64.8635
5.4	-64.8635	-64.8635
5.6	-64.8635	-64.8635
5.8	-64.8635	-64.8635
6	-64.8635	-64.8635
6.2	-64.8635	-64.8635
6.4	-64.8635	-64.8635
6.6	-64.8635	-64.8635
6.8	-64.8635	-64.8635
7	-64.8635	-64.8635
7.2	-64.8635	-64.8635
7.4	-64.8635	-64.8635
7.6	-64.8635	-64.8635
7.8	-64.8635	-64.8635
8	-64.8635	-64.8635
8.2	-64.8635	-64.8635
8.4	-64.8635	-64.8635
8.6	-64.8635	-64.8635
8.8	-64.8635	-64.8635
9	-64.8635	-64.8635
9.2	-64.8635	-64.8635
9.4	-64.8635	-64.8635
9.6	-64.8635	-64.8635
9.8	-64.8635	-64.8635
10	-64.8635	-64.8635
10.2	-64.8635	-64.8635
10.4	-64.8635	-64.8635
10.6	-64.8635	-64.8635
10.8	-64.8635	-64.8635
11	-64.8635	-64.8635
11.2	-64.8635	-64.8635
11.4	-64.8635	-64.8635
11.6	-64.8635	-64.8635
11.8	-64.8635	-64.8635
12	-64.8635	-64.8635
12.2	-64.8635	-64.8635
12.4	-64.8635	-64.8635
12.6	-64.8635	-64.8635
12.8	-64.8635	-64.8635
13	-64.8635	-64.8635
13.2	-64.8635	-64.8635
13.4	-64.8635	-64.8635
13.6	-64.8635	-64.8635
13.8	-64.8635	-64.8635
14	-64.8635	-64.8635
14.2	-64.8635	-64.8635
14.4	-64.8635	-64.8635
14.6	-64.8635	-64.8635
14.8	-64.8635	-64.8635
15	-64.8635	-64.8635
15.2	-64.8635	-64.8635
15.4	-64.8635	-64.8635
15.6	-64.8635	-64.8635
15.8	-64.8635	-64.8635
16	-64.8635	-64.8635
16.2	-64.8635	-64.8635
16.4	-64.8635	-64.8635
16.6	-64.8635	-64.8635
16.8	-64.8635	-64.8635
17	-64.8635	-64.8635
17.2	-64.8635	-64.8635
17.4	-64.8635	-64.8635
17.6	-64.8635	-64.8635
17.8	-64.8635	-64.8635
18	-64.8635	-64.8635
18.2	-64.8635	-64.8635
18.4	-64.8635	-64.8635
18.6	-64.8635	-64.8635
18.8	-64.8635	-64.8635
19	-64.8635	-64.8635
19.2	-64.8635	-64.8635
19.4	-64.8635	-64.8635
19.6	-64.8635	-64.8635
19.8	-64.8635	-64.8635
20	-64.8635	-64.8635
20.2	-64.8635	-64.8635
20.4	-64.8635	-64.8635
20.6	-64.8635	-64.8635
20.8	-64.8635	-64.8635
21	-64.8635	-64.8635
21.2	-64.8635	-64.8635
21.4	-64.8635	-64.8635
21.6	-64.8635	-64.8635
21.8	-64.8635	-64.8635
22	-64.8635	-64.8635
22.2	-64.8635	-64.8635
22.4	-64.8635	-64.8635
22.6	-64.8635	-64.8635
22.8	-64.8634	-64.8634
23	-64.8635	-64.8635
23.2	-64.8634	-64.8634
23.4	-64.8635	-64.8635
23.6	-64.8634	-64.8634
23.8	-64.8635	-64.8635
24	-64.8634	-64.8634
24.2	-64.8635	-64.8635
24.4	-64.8634	-64.8634
24.6	-64.8635	-64.8635
24.8	-64.8634	-64.8634
25	-64.8635	-64.8635
25.2	-64.8634	-64.8634
25.4	-64.8635	-64.8635
25.6	-64.8634	-64.8634
25.8	-64.8635	-64.8635
26	-64.8634	-64.8634
26.2	-64.8635	-64.8635
26.4	-64.8634	-64.8634
26.6	-64.8635	-64.8635
26.8	-64.8634	-64.8634
27	-64.8635	-64.8635
27.2	-64.8634	-64.8634
27.4	-64.8635	-64.8635
27.6	-64.8634	-64.8634
27.8	-64.8635	-64.8635
28	-64.8634	-64.8634
28.2	-64.8634	-64.8634
28.4	-64.8634	-64.8634
28.6	-64.8634	-64.8634
28.8	-64.8634	-64.8634
29	-64.8634	-64.8634
29.2	-64.8634	-64.8634
29.4	-64.8634	-64.8634
29.6	-64.8634	-64.8634
29.8	-64.8634	-64.8634
30	-64.8634	-64.8634
30.2	-64.8634	-64.8634
30.4	-64.8634	-64.8634
30.6	-64.8634	-64.8634
30.8	-64.8634	-64.8634
31	-64.8634	-64.8634
31.2	-64.8634	-64.8634
31.4	-64.8634	-64.8634
31.6	-64.8634	-64.8634
31.8	-64.8634	-64.8634
32	-64.8634	-64.8634
32.2	-64.8634	-64.8634
32.4	-64.8634	-64.8634
32.6	-64.8634	-64.8634
32.8	-64.8634	-64.8634
33	-64.8634	-64.8634
33.2	-64.8634	-64.8634
33.4	-64.8634	-64.8634
33.6	-64.8634	-64.8634
33.8	-64.8634	-64.8634
34	-64.8634	-64.8634
34.2	-64.8634	-64.8634
34.4	-64.8634	-64.8634
34.6	-64.8634	-64.8634
34.8	-64.8634	-64.8634
35	-64.8634	-64.8634
35.2	-64.8634	-64.8634
35.4	-64.8634	-64.8634
35.6	-64.8634	-64.8634
35.8	-64.8634	-64.8634
36	-64.8634	-64.8634
36.2	-64.8634	-64.8634
36.4	-64.8634	-64.8634
36.6	-64.8634	-64.8634
36.8	-64.8634	-64.8634
37	-64.8634	-64.8634
37.2	-64.8634	-64.8634
37.4	-64.8634	-64.8634
37.6	-64.8634	-64.8634
37.8	-64.8634	-64.8634
38	-64.8634	-64.8634
38.2	-64.8634	-64.8634
38.4	-64.8634	-64.8634
38.6	-64.8634	-64.8634
38.8	-64.8634	-64.8634
39	-64.8634	-64.8634
39.2	-64.8634	-64.8634
39.4	-64.8634	-64.8634
39.6	-64.8634	-64.8634
39.8	-64.8634	-64.8634
40	-64.8634	-64.8634
40.2	-64.8634	-64.8634
40.4	-64.8634	-64.8634
40.6	-64.8634	-64.8634
40.8	-64.8634	-64.8634
41	-64.8634	-64.8634
41.2	-64.8634	-64.8634
41.4	-64.8634	-64.8634
41.6	-64.8634	-64.8634
41.8	-64.8634	-64.8634
42	-64.8634	-64.8634
42.2	-64.8634	-64.8634
42.4	-64.8634	-64.8634
42.6	-64.8634	-64.8634
42.8	-64.8634	-64.8634
43	-64.8634	-64.8634
43.2	-64.8634	-64.8634
43.4	-64.8634	-64.8634
43.6	-64.8634	-64.8634
43.8	-64.8634	-64.8634
44	-64.8634	-64.8634
44.2	-64.8634	-64.8634
44.4	-64.8634	-64.8634
44.6	-64.8634	-64.8634
44.8	-64.8634	-64.8634
45	-64.8634	-64.8634
45.2	-64.8634	-64.8634
45.4	-64.8634	-64.8634
45.6	-64.8634	-64.8634
45.8	-64.8634	-64.8634
46	-64.8634	-64.8634
46.2	-64.8634	-64.8634
46.4	-64.8634	-64.8634
46.6	-64.8634	-64.8634
46.8	-64.8634	-64.8634
47	-64.8634	-64.8634
47.2	-64.8634	-64.8634
47.4	-64.8634	-64.8634
47.6	-64.8634	-64.8634
47.8	-64.8634	-64.8634
48	-64.8634	-64.8634
48.2	-64.8634	-64.8634
48.4	-64.8634	-64.8634
48.6	-64.8634	-64.8634
48.8	-64.8634	-64.8634
49	-64.8634	-64.8634
49.2	-64.8634	-64.8634
49.4	-64.8634	-64.8634
49.6	-64.8634	-64.8634
49.8	-64.8634	-64.8634
50	-64.8634	-64.8634
50.2	-64.8634	-64.8634
50.4	-64.8634	-64.8634
50.6	-64.8634	-64.8634
50.8	-64.8634	-64.8634
51	-64.8634	-64.8634
51.2	-64.8634	-64.8634
51.4	-64.8634	-64.8634
51.6	-64.8634	-64.8634
51.8	-64.8634	-64.8634
52	-64.8634	-64.8634
52.2	-64.8634	-64.8634
52.4	-64.8634	-64.8634
52.6	-64.8634	-64.8634
52.8	-64.8634	-64.8634
53	-64.8634	-64.8634
53.2	-64.8634	-64.8634
53.4	-64.8634	-64.8634
53.6	-64.8634	-64.8634
53.8	-64.8634	-64.8634
54	-64.8634	-64.8634
54.2	-64.8634	-64.8634
54.4	-64.8634	-64.8634
54.6	-64.8634	-64.8634
54.8	-64.8634	-64.8634
55	-64.8634	-64.8634
55.2	-64.8634	-64.8634
55.4	-64.8634	-64.8634
55.6	-64.8634	-64.8634
55.8	-64.8634	-64.8634
56	-64.8634	-64.8634
56.2	-64.8634	-64.8634
56.4	-64.8634	-64.8634
56.6	-64.8634	-64.8634
56.8	-64.8634	-64.8634
57	-64.8634	-64.8634
57.2	-64.8634	-64.8634
57.4	-64.8634	-64.8634
57.6	-64.8634	-64.8634
57.8	-64.8634	-64.8634
58	-64.8634	-64.8634
58.2	-64.8634	-64.8634
58.4	-64.8634	-64.8634
58.6	-64.8634	-64.8634
58.8	-64.8634	-64.8634
59	-64.8634	-64.8634
59.2	-64.8634	-64.8634
59.4	-64.8634	-64.8634
59.6	-64.8634	-64.8634
59.8	-64.8634	-64.8634
60	-64.8634	-64.8634
60.2	-64.8634	-64.8634
60.4	-64.8634	-64.8634
60.6	-64.8634	-64.8634
60.8	-64.8634	-64.8634
61	-64.8634	-64.8634
61.2	-64.8634	-64.8634
61.4	-64.8634	-64.8634
61.6	-64.8634	-64.8634
61.8	-64.8634	-64.8634
62	-64.8634	-64.8634
62.2	-64.8634	-64.8634
62.4	-64.8634	-64.8634
62.6	-64.8634	-64.8634
62.8	-64.8634	-64.8634
63	-64.8634	-64.8634
63.2	-64.8634	-64.8634
63.4	-64.8634	-64.8634
63.6	-64.8634	-64.8634
63.8	-64.8634	-64.8634
64	-64.8634	-64.8634
64.2	-64.8634	-64.8634
64.4	-64.8634	-64.8634
64.6	-64.8634	-64.8634
64.8	-64.8634	-64.8634
65	-64.8634	-64.8634
65.2	-64.8634	-64.8634
65.4	-64.8634	-64.8634
65.6	-64.8634	-64.8634
65.8	-64.8634	-64.8634
66	-64.8634	-64.8634
66.2	-64.8634	-64.8634
66.4	-64.8634	-64.8634
66.6	-64.8634	-64.8634
66.8	-64.8634	-64.8634
67	-64.8634	-64.8634
67.2	-64.8634	-64.8634
67.4	-64.8634	-64.8634
67.6	-64.8634	-64.8634
67.8	-64.8634	-64.8634
68	-64.8634	-64.8634
68.2	-64.8634	-64.8634
68.4	-64.8634	-64.8634
68.6	-64.8634	-64.8634
68.8	-64.8634	-64.8634
69	-64.8634	-64.8634
69.2	-64.8634	-64.8634
69.4	-64.8634	-64.8634
69.6	-64.8634	-64.8634
69.8	-64.8634	-64.8634
70	-64.8634	-64.8634
70.2	-64.8634	-64.8634
70.4	-64.8634	-64.8634
70.6	-64.8634	-64.8634
70.8	-64.8634	-64.8634
71	-64.8634	-64.8634
71.2	-64.8634	-64.8634
71.4	-64.8634	-64.8634
71.6	-64.8634	-64.8634
71.8	-64.8634	-64.8634
72	-64.8634	-64.8634
72.2	-64.8634	-64.8634
72.4	-64.8634	-64.8634
72.6	-64.8634	-64.8634
72.8	-64.8634	-64.8634
73	-64.8634	-64.8634
73.2	-64.8634	-64.8634
73.4	-64.8634	-64.8634
73.6	-64.8634	-64.8634
73.8	-64.8634	-64.8634
74	-64.8634	-64.8634
74.2	-64.8634	-64.8634
74.4	-64.8634	-64.8634
74.6	-64.8634	-64.8634
74.8	-64.8634	-64.8634
75	-64.8634	-64.8634
75.2	-64.8634	-64.8634
75.4	-64.8634	-64.8634
75.6	-64.8634	-64.8634
75.8	-64.8634	-64.8634
76	-64.8634	-64.8634
76.2	-64.8634	-64.8634
76.4	-64.8634	-64.8634
76.6	-64.8634	-64.8634
76.8	-64.8634	-64.8634
77	-64.8634	-64.8634
77.2	-64.8634	-64.8634
77.4	-64.8634	-64.8634
77.6	-64.8634	-64.8634
77.8	-64.8634	-64.8634
78	-64.8634	-64.8634
78.2	-64.8634	-64.8634
78.4	-64.8634	-64.8634
78.6	-64.8634	-64.8634
78.8	-64.8634	-64.8634
79	-64.8634	-64.8634
79.2	-64.8634	-64.8634
79.4	-64.8634	-64.8634
79.6	-64.8634	-64.8634
79.8	-64.8634	-64.8634
80	-64.8634	-64.8634
80.2	-64.8634	-64.8634
80.4	-64.8634	-64.8634
80.6	-64.8634	-64.8634
80.8	-64.8634	-64.8634
81	-64.8634	-64.8634
81.2	-64.8634	-64.8634
81.4	-64.8634	-64.8634
81.6	-64.8634	-64.8634
81.8	-64.8634	-64.8634
82	-64.8634	-64.8634
82.2	-64.8634	-64.8634
82.4	-64.8634	-64.8634
82.6	-64.8634	-64.8634
82.8	-64.8634	-64.8634
83	-64.8634	-64.8634
83.2	-64.8634	-64.8634
83.4	-64.8634	-64.8634
83.6	-64.8634	-64.8634
83.8	-64.8634	-64.8634
84	-64.8634	-64.8634
84.2	-64.8634	-64.8634
84.4	-64.8634	-64.8634
84.6	-64.8634	-64.8634
84.8	-64.8634	-64.8634
85	-64.8634	-64.8634
85.2	-64.8634	-64.8634
85.4	-64.8634	-64.8634
85.6	-64.8634	-64.8634
85.8	-64.8634	-64.8634
86	-64.8634	-64.8634
86.2	-64.8634	-64.8634
86.4	-64.8634	-64.8634
86.6	-64.8634	-64.8634
86.8	-64.8634	-64.8634
87	-64.8634	-64.8634
87.2	-64.8634	-64.8634
87.4	-64.8634	-64.8634
87.6	-64.8634	-64.8634
87.8	-64.8634	-64.8634
88	-64.8634	-64.8634
88.2	-64.8634	-64.8634
88.4	-64.8634	-64.8634
88.6	-64.8634	-64.8634
88.8	-64.8634	-64.8634
89	-64.8634	-64.8634
89.2	-64.8634	-64.8634
89.4	-64.8634	-64.8634
89.6	-64.8634	-64.8634
89.8	-64.8634	-64.8634
90	-64.8634	-64.8634
90.2	-64.8634	-64.8634
90.4	-64.8634	-64.8634
90.6	-64.8634	-64.8634
90.8	-64.8634	-64.8634
91	-64.8634	-64.8634
91.2	-64.8634	-64.8634
91.4	-64.8634	-64.8634
91.6	-64.8634	-64.8634
91.8	-64.8634	-64.8634
92	-64.8634	-64.8634
92.2	-64.8634	-64.8634
92.4	-64.8634	-64.8634
92.6	-64.8634	-64.8634
92.8	-64.8634	-64.8634
93	-64.8634	-64.8634
93.2	-64.8634	-64.8634
93.4	-64.8634	-64.8634
93.6	-64.8634	-64.8634
93.8	-64.8634	-64.8634
94	-64.8634	-64.8634
94.2	-64.8634	-64.8634
94.4	-64.8634	-64.8634
94.6	-64.8634	-64.8634
94.8	-64.8634	-64.8634
95	-64.8634	-64.8634
95.2	-64.8634	-64.8634
95.4	-64.8634	-64.8634
95.6	-64.8634	-64.8634
95.8	-64.8634	-64.8634
96	-64.8634	-64.8634
96.2	-64.8634	-64.8634
96.4	-64.8634	-64.8634
96.6	-64.8634	-64.8634
96.8	-64.8634	-64.8634
97	-64.8634	-64.8634
97.2	-64.8634	-64.8634
97.4	-64.8634	-64.8634
97.6	-64.8634	-64.8634
97.8	-64.8634	-64.8634
98	-64.8634	-64.8634
98.2	-64.8634	-64.8634
98.4	-64.8634	-64.8634
98.6	-64.8634	-64.8634
98.8	-64.8634	-64.8634
99	-64.8634	-64.8634
99.2	-64.8634	-64.8634
99.4	-64.8634	-64.8634
99.6	-64.8634	-64.8634
99.8	-64.8634	-64.8634
100	-64.8634	-64.8634
100.2	-64.8634	-64.8634
100.4	-64.8634	-64.8634
100.6	-64.8634	-64.8634
100.8	-64.8634	-64.8634
101	-64.8634	-64.8634
101.2	-64.8634	-64.8634
101.4	-64.8634	-64.8634
101.6	-64.8634	-64.8634
101.8	-64.8634	-64.8634
102	-64.8634	-64.8634
102.2	-64.8634	-64.8634
102.4	-64.8634	-64.8634
102.6	-64.8634	-64.8634
102.8	-64.8634	-64.8634
103	-64.8634	-64.8634
103.2	-64.8634	-64.8634
103.4	-64.8634	-64.8634
103.6	-64.8634	-64.8634
103.8	-64.8634	-64.8634
104	-64.8634	-64.8634
104.2	-64.8634	-64.8634
104.4	-64.8634	-64.8634
104.6	-64.8634	-64.8634
104.8	-64.8634	-64.8634
105	-64.8634	-64.8634
105.2	-64.8634	-64.8634
105.4	-64.8634	-64.8634
105.6	-64.8634	-64.8634
105.8	-64.8634	-64.8634
106	-64.8634	-64.8634
106.2	-64.8634	-64.8634
106.4	-64.8634	-64.8634
106.6	-64.8634	-64.8634
106.8	-64.8634	-64.8634
107	-64.8634	-64.8634
107.2	-64.8634	-64.8634
107.4	-64.8634	-64.8634
107.6	-64.8634	-64.8634
107.8	-64.8634	-64.8634
108	-64.8634	-64.8634
108.2	-64.8634	-64.8634
108.4	-64.8634	-64.8634
108.6	-64.8634	-64.8634
108.8	-64.8634	-64.8634
109	-64.8634	-64.8634
109.2	-64.8634	-64.8634
109.4	-64.8634	-64.8634
109.6	-64.8634	-64.8634
109.8	-64.8634	-64.8634
110	-64.8634	-64.8634
110.2	-64.8634	-64.8634
110.4	-64.8634	-64.8634
110.6	-64.8634	-64.8634
110.8	-64.8634	-64.8634
111	-64.8634	-64.8634
111.2	-64.8634	-64.8634
111.4	-64.8634	-64.8634
111.6	-64.8634	-64.8634
111.8	-64.8634	-64.8634
112	-64.8634	-64.8634
112.2	-64.8634	-64.8634
112.4	-64.8634	-64.8634
112.6	-64.8634	-64.8634
112.8	-64.8634	-64.8634
113	-64.8634	-64.8634
113.2	-64.8634	-64.8634
113.4	-64.8634	-64.8634
113.6	-64.8634	-64.8634
113.8	-64.8634	-64.8634
114	-64.8634	-64.8634
114.2	-64.8634	-64.8634
114.4	-64.8634	-64.8634
114.6	-64.8634	-64.8634
114.8	-64.8634	-64.8634
115	-64.8634	-64.8634
115.2	-64.8634	-64.8634
115.4	-64.8634	-64.8634
115.6	-64.8634	-64.8634
115.8	-64.8634	-64.8634
116	-64.8634	-64.8634
116.2	-64.8634	-64.8634
116.4	-64.8634	-64.8634
116.6	-64.8634	-64.8634
116.8	-64.8634	-64.8634
117	-64.8634	-64.8634
117.2	-64.8634	-64.8634
117.4	-64.8634	-64.8634
117.6	-64.8634	-64.8634
117.8	-64.8634	-64.8634
118	-64.8634	-64.8634
118.2	-64.8634	-64.8634
118.4	-64.8634	-64.8634
118.6	-64.8634	-64.8634
118.8	-64.8634	-64.8634
119	-64.8634	-64.8634
119.2	-64.8634	-64.8634
119.4	-64.8634	-64.8634
119.6	-64.8634	-64.8634
119.8	-64.8634	-64.8634
120	-64.8634	-64.8634
120.2	-64.8634	-64.8634
120.4	-64.8634	-64.8634
120.6	-64.8634	-64.8634
120.8	-64.8634	-64.8634
121	-64.8634	-64.8634
121.2	-64.8634	-64.8634
121.4	-64.8634	-64.8634
121.6	-64.8634	-64.8634
121.8	-64.8634	-64.8634
122	-64.8634	-64.8634
122.2	-64.8634	-64.8634
122.4	-64.8634	-64.8634
122.6	-64.8634	-64.8634
122.8	-64.8634	-64.8634
123	-64.8634	-64.8634
123.2	-64.8634	-64.8634
123.4	-64.8634	-64.8634
123.6	-64.8634	-64.8634
123.8	-64.8634	-64.8634
124	-64.8634	-64.8634
124.2	-64.8634	-64.8634
124.4	-64.8634	-64.8634
124.6	-64.8634	-64.8634
124.8	-64.8634	-64.8634
125	-64.8634	-64.8634
125.2	-64.8634	-64.8634
125.4	-64.8634	-64.8634
125.6	-64.8634	-64.8634
125.8	-64.8634	-64.8634
126	-64.8634	-64.8634
126.2	-64.8634	-64.8634
126.4	-64.8634	-64.8634
126.6	-64.8634	-64.8634
126.8	-64.8634	-64.8634
127	-64.8634	-64.8634
127.2	-64.8634	-64.8634
127.4	-64.8634	-64.8634
127.6	-64.8634	-64.8634
127.8	-64.8634	-64.8634
128	-64.8634	-64.8634
128.2	-64.8634	-64.8634
128.4	-64.8634	-64.8634
128.6	-64.8634	-64.8634
128.8	-64.8634	-64.8634
129	-64.8634	-64.8634
129.2	-64.8634	-64.8634
129.4	-64.8634	-64.8634
129.6	-64.8634	-64.8634
129.8	-64.8634	-64.8634
130	-64.8634	-64.8634
130.2	-64.8634	-64.8634
130.4	-64.8634	-64.8634
130.6	-64.8634	-64.8634
130.8	-64.8634	-64.8634
131	-64.8634	-64.8634
131.2	-64.8634	-64.8634
131.4	-64.8634	-64.8634
131.6	-64.8634	-64.8634
131.8	-64.8634	-64.8634
132	-64.8634	-64.8634
132.2	-64.8634	-64.8634
132.4	-64.8634	-64.8634
132.6	-64.8634	-64.8634
132.8	-64.8634	-64.8634
133	-64.8634	-64.8634
133.2	-64.8634	-64.8634
133.4	-64.8634	-64.8634
133.6	-64.8634	-64.8634
133.8	-64.8634	-64.8634
134	-64.8634	-64.8634
134.2	-64.8634	-64.8634
134.4	-64.8634	-64.8634
134.6	-64.8634	-64.8634
134.8	-64.8634	-64.8634
135	-64.8634	-64.8634
135.2	-64.8634	-64.8634
135.4	-64.8634	-64.8634
135.6	-64.8634	-64.8634
135.8	-64.8634	-64.8634
136	-64.8634	-64.8634
136.2	-64.8634	-64.8634
136.4	-64.8634	-64.8634
136.6	-64.8634	-64.8634
136.8	-64.8634	-64.8634
137	-64.8634	-64.8634
137.2	-64.8634	-64.8634
137.4	-64.8634	-64.8634
137.6	-64.8634	-64.8634
137.8	-64.8634	-64.8634
138	-64.8634	-64.8634
138.2	-64.8634	-64.8634
138.4	-64.8634	-64.8634
138.6	-64.8634	-64.8634
138.8	-64.8634	-64.8634
139	-64.8634	-64.8634
139.2	-64.8634	-64.8634
139.4	-64.8634	-64.8634
139.6	-64.8634	-64.8634
139.8	-64.8634	-64.8634
140	-64.8634	-64.8634
140.2	-64.8634	-64.8634
140.4	-64.8634	-64.8634
140.6	-64.8634	-64.8634
140.8	-64.8634	-64.8634
141	-64.8634	-64.8634
141.2	-64.8634	-64.8634
141.4	-64.8634	-64.8634
141.6	-64.8634	-64.8634
141.8	-64.8634	-64.8634
142	-64.8634	-64.8634
142.2	-64.8634	-64.8634
142.4	-64.8634	-64.8634
142.6	-64.8634	-64.8634
142.8	-64.8634	-64.8634
143	-64.8634	-64.8634
143.2	-64.8634	-64.8634
143.4	-64.8634	-64.8634
143.6	-64.8634	-64.8634
143.8	-64.8634	-64.8634
144	-64.8634	-64.8634
144.2	-64.8634	-64.8634
144.4	-64.8634	-64.8634
144.6	-64.8634	-64.8634
144.8	-64.8634	-64.8634
145	-64.8634	-64.8634
145.2	-64.8634	-64.8634
145.4	-64.8634	-64.8634
145.6	-64.8634	-64.8634
145.8	-64.8634	-64.8634
146	-64.8634	-64.8634
146.2	-64.8634	-64.8634
146.4	-64.8634	-64.8634
146.6	-64.8634	-64.8634
146.8	-64.8634	-64.8634
147	-64.8634	-64.8634
147.2	-64.8634	-64.8634
147.4	-64.8634	-64.8634
147.6	-64.8634	-64.8634
147.8	-64.8634	-64.8634
148	-64.8634	-64.8634
148.2	-64.8634	-64.8634
148.4	-64.8634	-64.8634
148.6	-64.8634	-64.8634
148.8	-64.8634	-64.8634
149	-64.8634	-64.8634
149.2	-64.8634	-64.8634
149.4	-64.8634	-64.8634
149.6	-64.8634	-64.8634
149.8	-64.8634	-64.8634
150	-64.8634	-64.8634
150.2	-64.8634	-64.8634
150.4	-64.8291	-64.8271
150.6	-64.7588	-64.7484
150.8	-64.6652	-64.6414
151	-64.5524	-64.5111
151.2	-64.4278	-64.3656
151.4	-64.2951	-64.21
151.6	-64.1589	-64.0495
151.8	-64.0216	-63.8876
152	-63.8861	-63.7275
152.2	-63.7537	-63.5711
152.4	-63.626	-63.4202
152.6	-63.5035	-63.2757
152.8	-63.3871	-63.1384
153	-63.2767	-63.0084
153.2	-63.1728	-62.8862
153.4	-63.0751	-62.7714
153.6	-62.9838	-62.6642
153.8	-62.8985	-62.5642
154	-62.8192	-62.4712
154.2	-62.7455	-62.3848
154.4	-62.6773	-62.3048
154.6	-62.6142	-62.2309
154.8	-62.5561	-62.1628
155	-62.5027	-62.1
155.2	-62.4537	-62.0426
155.4	-62.4089	-61.9899
155.6	-62.3681	-61.9419
155.8	-62.3311	-61.8983
156	-62.2977	-61.8588
156.2	-62.2676	-61.8232
156.4	-62.2407	-61.7914
156.6	-62.2169	-61.763
156.8	-62.1959	-61.7379
157	-62.1776	-61.7159
157.2	-62.162	-61.697
157.4	-62.1487	-61.6807
157.6	-62.1377	-61.6672
157.8	-62.1289	-61.6562
158	-62.1221	-61.6475
158.2	-62.1173	-61.6411
158.4	-62.1143	-61.6368
158.6	-62.113	-61.6345
158.8	-62.1134	-61.6341
159	-62.1153	-61.6355
159.2	-62.1187	-61.6387
159.4	-62.1235	-61.6434
159.6	-62.1296	-61.6497
159.8	-62.1369	-61.6573
160	-62.1454	-61.6664
160.2	-62.1549	-61.6767
160.4	-62.1656	-61.6883
160.6	-62.1771	-61.701
160.8	-62.1897	-61.7148
161	-62.203	-61.7296
161.2	-62.2172	-61.7454
161.4	-62.2322	-61.762
161.6	-62.2478	-61.7796
161.8	-62.2642	-61.7979
162	-62.2812	-61.817
162.2	-62.2987	-61.8367
162.4	-62.3168	-61.8571
162.6	-62.3354	-61.8782
162.8	-62.3545	-61.8998
163	-62.374	-61.9219
163.2	-62.394	-61.9446
163.4	-62.4143	-61.9677
163.6	-62.435	-61.9912
163.8	-62.456	-62.0152
164	-62.4773	-62.0395
164.2	-62.4989	-62.0641
164.4	-62.5207	-62.089
164.6	-62.5427	-62.1142
164.8	-62.565	-62.1397
165	-62.5874	-62.1654
165.2	-62.61	-62.1913
165.4	-62.6327	-62.2174
165.6	-62.6555	-62.2437
165.8	-62.6785	-62.2701
166	-62.7015	-62.2966
166.2	-62.7246	-62.3232
166.4	-62.7478	-62.3499
166.6	-62.771	-62.3767
166.8	-62.7942	-62.4035
167	-62.8175	-62.4304
167.2	-62.8408	-62.4573
167.4	-62.864	-62.4842
167.6	-62.8873	-62.5111
167.8	-62.9104	-62.538
168	-62.9336	-62.5648
168.2	-62.9567	-62.5916
168.4	-62.9798	-62.6184
168.6	-63.0028	-62.6451
168.8	-63.0257	-62.6717
169	-63.0486	-62.6983
169.2	-63.0713	-62.7248
169.4	-63.094	-62.7511
169.6	-63.1165	-62.7774
169.8	-63.139	-62.8036
170	-63.1613	-62.8296
170.2	-63.1835	-62.8555
170.4	-63.2056	-62.8813
170.6	-63.2276	-62.9069
170.8	-63.2494	-62.9324
171	-63.2711	-62.9578
171.2	-63.2926	-62.983
171.4	-63.314	-63.008
171.6	-63.3353	-63.0329
171.8	-63.3564	-63.0576
172	-63.3773	-63.0822
172.2	-63.3981	-63.1066
172.4	-63.4187	-63.1308
172.6	-63.4392	-63.1548
172.8	-63.4595	-63.1786
173	-63.4796	-63.2023
173.2	-63.4996	-63.2258
173.4	-63.5193	-63.249
173.6	-63.5389	-63.2721
173.8	-63.5584	-63.295
174	-63.5776	-63.3177
174.2	-63.5967	-63.3402
174.4	-63.6156	-63.3625
174.6	-63.6343	-63.3846
174.8	-63.6529	-63.4065
175	-63.6713	-63.4282
175.2	-63.6895	-63.4497
175.4	-63.7075	-63.471
175.6	-63.7253	-63.4921
175.8	-63.7429	-63.513
176	-63.7604	-63.5336
176.2	-63.7777	-63.5541
176.4	-63.7948	-63.5744
176.6	-63.8117	-63.5944
176.8	-63.8284	-63.6143
177	-63.845	-63.634
177.2	-63.8613	-63.6534
177.4	-63.8775	-63.6726
177.6	-63.8936	-63.6917
177.8	-63.9094	-63.7105
178	-63.925	-63.7291
178.2	-63.9405	-63.7476
178.4	-63.9558	-63.7658
178.6	-63.9709	-63.7838
178.8	-63.9859	-63.8016
179	-64.0006	-63.8192
179.2	-64.0152	-63.8367
179.4	-64.0296	-63.8539
179.6	-64.0439	-63.8709
179.8	-64.0579	-63.8877
180	-64.0718	-63.9043
180.2	-64.0856	-63.9208
180.4	-64.0991	-63.937
180.6	-64.1125	-63.953
180.8	-64.1257	-63.9689
181	-64.1388	-63.9845
181.2	-64.1517	-64
181.4	-64.1644	-64.0152
181.6	-64.177	-64.0303
181.8	-64.1894	-64.0452
182	-64.2016	-64.0599
182.2	-64.2137	-64.0745
182.4	-64.2256	-64.0888
182.6	-64.2374	-64.103
182.8	-64.249	-64.1169
183	-64.2604	-64.1307
183.2	-64.2717	-64.1444
183.4	-64.2829	-64.1578
183.6	-64.2939	-64.1711
183.8	-64.3047	-64.1841
184	-64.3154	-64.1971
184.2	-64.326	-64.2098
184.4	-64.3364	-64.2224
184.6	-64.3466	-64.2348
184.8	-64.3568	-64.247
185	-64.3667	-64.2591
185.2	-64.3766	-64.271
185.4	-64.3863	-64.2828
185.6	-64.3959	-64.2944
185.8	-64.4053	-64.3058
186	-64.4146	-64.3171
186.2	-64.4237	-64.3282
186.4	-64.4328	-64.3391
186.6	-64.4416	-64.3499
186.8	-64.4504	-64.3606
187	-64.459	-64.371
187.2	-64.4676	-64.3814
187.4	-64.4759	-64.3916
187.6	-64.4842	-64.4016
187.8	-64.4923	-64.4115
188	-64.5004	-64.4213
188.2	-64.5082	-64.4309
188.4	-64.516	-64.4404
188.6	-64.5237	-64.4497
188.8	-64.5312	-64.4589
189	-64.5387	-64.468
189.2	-64.546	-64.4769
189.4	-64.5532	-64.4857
189.6	-64.5603	-64.4943
189.8	-64.5672	-64.5029
190	-64.5741	-64.5113
190.2	-64.5809	-64.5195
190.4	-64.5875	-64.5277
190.6	-64.5941	-64.5357
190.8	-64.6005	-64.5436
191	-64.6069	-64.5513
191.2	-64.6131	-64.559
191.4	-64.6192	-64.5665
191.6	-64.6253	-64.5739
191.8	-64.6312	-64.5812
192	-64.6371	-64.5884
192.2	-64.6428	-64.5954
192.4	-64.6485	-64.6024
192.6	-64.6541	-64.6092
192.8	-64.6596	-64.6159
193	-64.6649	-64.6226
193.2	-64.6702	-64.6291
193.4	-64.6754	-64.6355
193.6	-64.6806	-64.6418
193.8	-64.6856	-64.6479
194	-64.6905	-64.654
194.2	-64.6954	-64.66
194.4	-64.7002	-64.6659
194.6	-64.7049	-64.6717
194.8	-64.7095	-64.6774
195	-64.714	-64.683
195.2	-64.7185	-64.6885
195.4	-64.7229	-64.6939
195.6	-64.7272	-64.6992
195.8	-64.7314	-64.7044
196	-64.7356	-64.7095
196.2	-64.7397	-64.7145
196.4	-64.7437	-64.7195
196.6	-64.7476	-64.7244
196.8	-64.7515	-64.7291
197	-64.7553	-64.7338
197.2	-64.759	-64.7384
197.4	-64.7627	-64.7429
197.6	-64.7663	-64.7474
197.8	-64.7698	-64.7518
198	-64.7733	-64.756
198.2	-64.7767	-64.7602
198.4	-64.78	-64.7644
198.6	-64.7833	-64.7684
198.8	-64.7865	-64.7724
199	-64.7897	-64.7763
199.2	-64.7928	-64.7801
199.4	-64.7958	-64.7839
199.6	-64.7988	-64.7876
199.8	-64.8017	-64.7912
200	-64.8046	-64.7947
200.2	-64.8074	-64.7982
200.4	-64.7176	-64.7095
200.6	-64.5328	-64.5271
200.8	-64.2873	-64.2866
201	-63.993	-64
201.2	-63.6712	-63.6884
201.4	-63.3321	-63.3617
201.6	-62.9897	-63.0327
201.8	-62.6501	-62.7071
202	-62.3213	-62.3923
202.2	-62.0057	-62.0903
202.4	-61.7075	-61.805
202.6	-61.4266	-61.536
202.8	-61.1647	-61.2852
203	-60.9204	-61.0512
203.2	-60.6942	-60.8345
203.4	-60.4842	-60.6333
203.6	-60.2906	-60.4478
203.8	-60.1112	-60.2762
204	-59.9461	-60.1183
204.2	-59.7935	-59.9725
204.4	-59.6532	-59.8387
204.6	-59.5237	-59.7154
204.8	-59.4049	-59.6025
205	-59.2954	-59.4987
205.2	-59.1952	-59.4039
205.4	-59.1031	-59.3171
205.6	-59.0192	-59.2382
205.8	-58.9423	-59.1662
206	-58.8725	-59.1012
206.2	-58.809	-59.0422
206.4	-58.7518	-58.9894
206.6	-58.7	-58.942
206.8	-58.6539	-58.9
207	-58.6127	-58.8628
207.2	-58.5765	-58.8304
207.4	-58.5447	-58.8023
207.6	-58.5174	-58.7786
207.8	-58.494	-58.7587
208	-58.4747	-58.7427
208.2	-58.4589	-58.7302
208.4	-58.4469	-58.7212
208.6	-58.438	-58.7153
208.8	-58.4326	-58.7126
209	-58.43	-58.7127
209.2	-58.4305	-58.7157
209.4	-58.4337	-58.7213
209.6	-58.4396	-58.7295
209.8	-58.448	-58.7401
210	-58.459	-58.753
210.2	-58.4721	-58.768
210.4	-58.4876	-58.7852
210.6	-58.5051	-58.8043
210.8	-58.5247	-58.8254
211	-58.5461	-58.8481
211.2	-58.5695	-58.8727
211.4	-58.5945	-58.8988
211.6	-58.6213	-58.9266
211.8	-58.6496	-58.9557
212	-58.6795	-58.9863
212.2	-58.7108	-59.0181
212.4	-58.7435	-59.0512
212.6	-58.7774	-59.0855
212.8	-58.8126	-59.1209
213	-58.8489	-59.1573
213.2	-58.8863	-59.1947
213.4	-58.9248	-59.233
213.6	-58.9642	-59.2722
213.8	-59.0045	-59.3122
214	-59.0457	-59.353
214.2	-59.0877	-59.3944
214.4	-59.1305	-59.4366
214.6	-59.1739	-59.4792
214.8	-59.218	-59.5225
215	-59.2627	-59.5663
215.2	-59.3079	-59.6106
215.4	-59.3537	-59.6553
215.6	-59.3999	-59.7004
215.8	-59.4465	-59.7458
216	-59.4936	-59.7916
216.2	-59.5409	-59.8376
216.4	-59.5886	-59.8839
216.6	-59.6365	-59.9304
216.8	-59.6848	-59.9771
217	-59.7332	-60.0239
217.2	-59.7818	-60.0709
217.4	-59.8305	-60.1179
217.6	-59.8794	-60.1651
217.8	-59.9283	-60.2123
218	-59.9773	-60.2595
218.2	-60.0263	-60.3067
218.4	-60.0754	-60.354
218.6	-60.1245	-60.4011
218.8	-60.1736	-60.4483
219	-60.2225	-60.4953
219.2	-60.2715	-60.5423
219.4	-60.3203	-60.5891
219.6	-60.3691	-60.6359
219.8	-60.4177	-60.6824
220	-60.4663	-60.7289
220.2	-60.5146	-60.7752
220.4	-60.5628	-60.8213
220.6	-60.6108	-60.8672
220.8	-60.6587	-60.913
221	-60.7063	-60.9585
221.2	-60.7538	-61.0038
221.4	-60.801	-61.0488
221.6	-60.848	-61.0937
221.8	-60.8948	-61.1383
222	-60.9413	-61.1826
222.2	-60.9875	-61.2267
222.4	-61.0336	-61.2705
222.6	-61.0793	-61.3141
222.8	-61.1248	-61.3574
223	-61.1699	-61.4004
223.2	-61.2148	-61.4431
223.4	-61.2594	-61.4855
223.6	-61.3037	-61.5276
223.8	-61.3477	-61.5694
224	-61.3915	-61.611
224.2	-61.4348	-61.6522
224.4	-61.4779	-61.6931
224.6	-61.5207	-61.7337
224.8	-61.5631	-61.774
225	-61.6053	-61.8139
225.2	-61.6471	-61.8536
225.4	-61.6886	-61.8929
225.6	-61.7297	-61.9319
225.8	-61.7705	-61.9706
226	-61.8111	-62.009
226.2	-61.8512	-62.047
226.4	-61.8911	-62.0847
226.6	-61.9305	-62.1221
226.8	-61.9697	-62.1592
227	-62.0086	-62.1959
227.2	-62.0471	-62.2323
227.4	-62.0852	-62.2684
227.6	-62.1231	-62.3042
227.8	-62.1605	-62.3396
228	-62.1977	-62.3747
228.2	-62.2345	-62.4094
228.4	-62.271	-62.4439
228.6	-62.3072	-62.478
228.8	-62.343	-62.5118
229	-62.3785	-62.5453
229.2	-62.4137	-62.5784
229.4	-62.4485	-62.6112
229.6	-62.483	-62.6437
229.8	-62.5171	-62.6759
230	-62.551	-62.7078
230.2	-62.5845	-62.7393
230.4	-62.6176	-62.7705
230.6	-62.6505	-62.8014
230.8	-62.683	-62.832
231	-62.7152	-62.8623
231.2	-62.7471	-62.8923
231.4	-62.7786	-62.9219
231.6	-62.8099	-62.9513
231.8	-62.8408	-62.9803
232	-62.8714	-63.009
232.2	-62.9017	-63.0375
232.4	-62.9317	-63.0656
232.6	-62.9613	-63.0934
232.8	-62.9907	-63.1209
233	-63.0197	-63.1481
233.2	-63.0484	-63.1751
233.4	-63.0768	-63.2017
233.6	-63.105	-63.228
233.8	-63.1328	-63.254
234	-63.1603	-63.2798
234.2	-63.1875	-63.3053
234.4	-63.2144	-63.3304
234.6	-63.241	-63.3553
234.8	-63.2673	-63.3799
235	-63.2934	-63.4042
235.2	-63.3191	-63.4283
235.4	-63.3445	-63.4521
235.6	-63.3697	-63.4756
235.8	-63.3946	-63.4988
236	-63.4192	-63.5217
236.2	-63.4435	-63.5444
236.4	-63.4675	-63.5668
236.6	-63.4913	-63.5889
236.8	-63.5147	-63.6108
237	-63.5379	-63.6324
237.2	-63.5609	-63.6538
237.4	-63.5835	-63.6749
237.6	-63.6059	-63.6957
237.8	-63.628	-63.7163
238	-63.6499	-63.7366
238.2	-63.6715	-63.7567
238.4	-63.6928	-63.7765
238.6	-63.7139	-63.7961
238.8	-63.7347	-63.8155
239	-63.7552	-63.8345
239.2	-63.7756	-63.8534
239.4	-63.7956	-63.872
239.6	-63.8154	-63.8904
239.8	-63.835	-63.9085
240	-63.8543	-63.9265
240.2	-63.8733	-63.9441
240.4	-63.8922	-63.9616
240.6	-63.9108	-63.9788
240.8	-63.9291	-63.9958
241	-63.9472	-64.0126
241.2	-63.9651	-64.0291
241.4	-63.9827	-64.0455
241.6	-64.0002	-64.0616
241.8	-64.0173	-64.0775
242	-64.0343	-64.0932
242.2	-64.051	-64.1086
242.4	-64.0675	-64.1239
242.6	-64.0838	-64.1389
242.8	-64.0999	-64.1538
243	-64.1158	-64.1684
243.2	-64.1314	-64.1829
243.4	-64.1468	-64.1971
243.6	-64.1621	-64.2112
243.8	-64.1771	-64.225
244	-64.1919	-64.2387
244.2	-64.2065	-64.2521
244.4	-64.2209	-64.2654
244.6	-64.235	-64.2785
244.8	-64.249	-64.2914
245	-64.2628	-64.3041
245.2	-64.2764	-64.3166
245.4	-64.2898	-64.329
245.6	-64.303	-64.3411
245.8	-64.3161	-64.3531
246	-64.3289	-64.3649
246.2	-64.3415	-64.3766
246.4	-64.354	-64.388
246.6	-64.3663	-64.3993
246.8	-64.3784	-64.4105
247	-64.3903	-64.4214
247.2	-64.402	-64.4322
247.4	-64.4136	-64.4429
247.6	-64.425	-64.4533
247.8	-64.4362	-64.4636
248	-64.4473	-64.4738
248.2	-64.4581	-64.4838
248.4	-64.4689	-64.4936
248.6	-64.4794	-64.5033
248.8	-64.4898	-64.5129
249	-64.5	-64.5222
249.2	-64.5101	-64.5315
249.4	-64.52	-64.5406
249.6	-64.5298	-64.5495
249.8	-64.5393	-64.5583
250	-64.5488	-64.567
250.2	-64.5581	-64.5755
250.4	-64.5128	-64.5318
250.6	-64.4092	-64.4227
250.8	-64.2682	-64.269
251	-64.0965	-64.0787
251.2	-63.9066	-63.8649
251.4	-63.7044	-63.6358
251.6	-63.498	-63.4002
251.8	-63.291	-63.1636
252	-63.0883	-62.9313
252.2	-62.8916	-62.7061
252.4	-62.7036	-62.4908
252.6	-62.5246	-62.2863
252.8	-62.3559	-62.0936
253	-62.1972	-61.9127
253.2	-62.049	-61.7438
253.4	-61.9105	-61.5862
253.6	-61.782	-61.4399
253.8	-61.6625	-61.3039
254	-61.5522	-61.178
254.2	-61.45	-61.0615
254.4	-61.356	-60.9539
254.6	-61.2693	-60.8547
254.8	-61.1898	-60.7633
255	-61.1169	-60.6793
255.2	-61.0504	-60.6024
255.4	-60.9896	-60.5318
255.6	-60.9346	-60.4676
255.8	-60.8847	-60.409
256	-60.8399	-60.356
256.2	-60.7995	-60.308
256.4	-60.7638	-60.265
256.6	-60.732	-60.2265
256.8	-60.7043	-60.1924
257	-60.6802	-60.1624
257.2	-60.6596	-60.1363
257.4	-60.6423	-60.1138
257.6	-60.6282	-60.0949
257.8	-60.617	-60.0792
258	-60.6087	-60.0667
258.2	-60.603	-60.0571
258.4	-60.5998	-60.0504
258.6	-60.5989	-60.0464
258.8	-60.6004	-60.0449
259	-60.604	-60.0458
259.2	-60.6096	-60.049
259.4	-60.6171	-60.0544
259.6	-60.6265	-60.0619
259.8	-60.6375	-60.0713
260	-60.6502	-60.0826
260.2	-60.6644	-60.0957
260.4	-60.6801	-60.1105
260.6	-60.6971	-60.1268
260.8	-60.7155	-60.1447
261	-60.7351	-60.164
261.2	-60.7558	-60.1846
261.4	-60.7776	-60.2066
261.6	-60.8005	-60.2298
261.8	-60.8244	-60.2541
262	-60.8491	-60.2795
262.2	-60.8747	-60.3059
262.4	-60.9011	-60.3333
262.6	-60.9283	-60.3616
262.8	-60.9562	-60.3908
263	-60.9847	-60.4208
263.2	-61.0139	-60.4515
263.4	-61.0436	-60.483
263.6	-61.0738	-60.5151
263.8	-61.1046	-60.5478
264	-61.1358	-60.5811
264.2	-61.1674	-60.6149
264.4	-61.1994	-60.6492
264.6	-61.2317	-60.684
264.8	-61.2644	-60.7192
265	-61.2974	-60.7548
265.2	-61.3306	-60.7908
265.4	-61.3641	-60.827
265.6	-61.3978	-60.8636
265.8	-61.4316	-60.9004
266	-61.4657	-60.9375
266.2	-61.4998	-60.9747
266.4	-61.5341	-61.0122
266.6	-61.5685	-61.0498
266.8	-61.603	-61.0876
267	-61.6375	-61.1254
267.2	-61.672	-61.1634
267.4	-61.7066	-61.2014
267.6	-61.7412	-61.2395
267.8	-61.7758	-61.2776
268	-61.8103	-61.3158
268.2	-61.8448	-61.3539
268.4	-61.8793	-61.392
268.6	-61.9137	-61.4301
268.8	-61.948	-61.4682
269	-61.9822	-61.5062
269.2	-62.0164	-61.5441
269.4	-62.0504	-61.5819
269.6	-62.0843	-61.6197
269.8	-62.1181	-61.6573
270	-62.1517	-61.6948
270.2	-62.1852	-61.7322
270.4	-62.2186	-61.7694
270.6	-62.2517	-61.8065
270.8	-62.2847	-61.8434
271	-62.3176	-61.8802
271.2	-62.3502	-61.9168
271.4	-62.3827	-61.9532
271.6	-62.415	-61.9895
271.8	-62.4471	-62.0255
272	-62.479	-62.0614
272.2	-62.5106	-62.097
272.4	-62.5421	-62.1324
272.6	-62.5733	-62.1676
272.8	-62.6044	-62.2026
273	-62.6352	-62.2374
273.2	-62.6658	-62.272
273.4	-62.6961	-62.3063
273.6	-62.7263	-62.3403
273.8	-62.7561	-62.3742
274	-62.7858	-62.4078
274.2	-62.8152	-62.4411
274.4	-62.8444	-62.4742
274.6	-62.8733	-62.5071
274.8	-62.902	-62.5397
275	-62.9304	-62.572
275.2	-62.9587	-62.6041
275.4	-62.9866	-62.6359
275.6	-63.0143	-62.6675
275.8	-63.0418	-62.6988
276	-63.069	-62.7298
276.2	-63.0959	-62.7606
276.4	-63.1226	-62.7911
276.6	-63.1491	-62.8213
276.8	-63.1753	-62.8513
277	-63.2012	-62.881
277.2	-63.2269	-62.9105
277.4	-63.2523	-62.9396
277.6	-63.2775	-62.9685
277.8	-63.3025	-62.9972
278	-63.3272	-63.0255
278.2	-63.3516	-63.0536
278.4	-63.3758	-63.0815
278.6	-63.3997	-63.109
278.8	-63.4234	-63.1363
279	-63.4468	-63.1633
279.2	-63.47	-63.1901
279.4	-63.4929	-63.2166
279.6	-63.5156	-63.2428
279.8	-63.5381	-63.2687
280	-63.5603	-63.2944
280.2	-63.5822	-63.3199
280.4	-63.6039	-63.345
280.6	-63.6254	-63.3699
280.8	-63.6466	-63.3946
281	-63.6676	-63.4189
281.2	-63.6883	-63.443
281.4	-63.7088	-63.4669
281.6	-63.7291	-63.4905
281.8	-63.7491	-63.5138
282	-63.7689	-63.5369
282.2	-63.7885	-63.5597
282.4	-63.8078	-63.5823
282.6	-63.8269	-63.6046
282.8	-63.8458	-63.6267
283	-63.8644	-63.6485
283.2	-63.8828	-63.6701
283.4	-63.901	-63.6914
283.6	-63.919	-63.7125
283.8	-63.9367	-63.7333
284	-63.9543	-63.7539
284.2	-63.9716	-63.7742
284.4	-63.9887	-63.7943
284.6	-64.0055	-63.8142
284.8	-64.0222	-63.8338
285	-64.0386	-63.8532
285.2	-64.0549	-63.8723
285.4	-64.0709	-63.8913
285.6	-64.0867	-63.9099
285.8	-64.1023	-63.9284
286	-64.1177	-63.9466
286.2	-64.1329	-63.9646
286.4	-64.1479	-63.9824
286.6	-64.1627	-63.9999
286.8	-64.1773	-64.0173
287	-64.1917	-64.0344
287.2	-64.2059	-64.0513
287.4	-64.2199	-64.0679
287.6	-64.2337	-64.0844
287.8	-64.2474	-64.1006
288	-64.2608	-64.1167
288.2	-64.2741	-64.1325
288.4	-64.2871	-64.1481
288.6	-64.3	-64.1635
288.8	-64.3127	-64.1787
289	-64.3253	-64.1937
289.2	-64.3376	-64.2085
289.4	-64.3498	-64.223
289.6	-64.3618	-64.2374
289.8	-64.3736	-64.2516
290	-64.3852	-64.2656
290.2	-64.3967	-64.2794
290.4	-64.408	-64.293
290.6	-64.4192	-64.3064
290.8	-64.4302	-64.3197
291	-64.441	-64.3327
291.2	-64.4516	-64.3455
291.4	-64.4621	-64.3582
291.6	-64.4724	-64.3707
291.8	-64.4826	-64.383
292	-64.4926	-64.3951
292.2	-64.5025	-64.4071
292.4	-64.5122	-64.4189
292.6	-64.5218	-64.4304
292.8	-64.5312	-64.4419
293	-64.5405	-64.4531
293.2	-64.5496	-64.4642
293.4	-64.5586	-64.4751
293.6	-64.5674	-64.4859
293.8	-64.5761	-64.4965
294	-64.5847	-64.5069
294.2	-64.5931	-64.5172
294.4	-64.6014	-64.5273
294.6	-64.6095	-64.5372
294.8	-64.6175	-64.547
295	-64.6254	-64.5567
295.2	-64.6331	-64.5662
295.4	-64.6408	-64.5755
295.6	-64.6483	-64.5847
295.8	-64.6556	-64.5937
296	-64.6629	-64.6026
296.2	-64.67	-64.6114
296.4	-64.677	-64.62
296.6	-64.6839	-64.6285
296.8	-64.6906	-64.6368
297	-64.6973	-64.645
297.2	-64.7038	-64.653
297.4	-64.7102	-64.661
297.6	-64.7165	-64.6687
297.8	-64.7227	-64.6764
298	-64.7288	-64.6839
298.2	-64.7348	-64.6913
298.4	-64.7407	-64.6986
298.6	-64.7464	-64.7057
298.8	-64.7521	-64.7127
299	-64.7576	-64.7196
299.2	-64.7631	-64.7264
299.4	-64.7684	-64.733
299.6	-64.7737	-64.7396
299.8	-64.7788	-64.746
300	-64.7839	-64.7523
300.2	-64.7889	-64.7585
300.4	-64.7494	-64.7256
300.6	-64.6638	-64.643
300.8	-64.5484	-64.525
301	-64.4081	-64.3776
301.2	-64.2532	-64.2104
301.4	-64.0878	-64.0297
301.6	-63.9186	-63.8424
301.8	-63.7482	-63.6529
302	-63.5808	-63.4655
302.2	-63.4174	-63.2825
302.4	-63.2606	-63.1063
302.6	-63.1105	-62.9379
302.8	-62.9686	-62.7783
303	-62.8343	-62.6275
303.2	-62.7085	-62.4861
303.4	-62.5905	-62.3534
303.6	-62.4806	-62.2298
303.8	-62.3781	-62.1144
304	-62.2832	-62.0073
304.2	-62.1951	-61.9078
304.4	-62.1138	-61.8158
304.6	-62.0387	-61.7306
304.8	-61.9698	-61.652
305	-61.9064	-61.5796
305.2	-61.8485	-61.5132
305.4	-61.7955	-61.4523
305.6	-61.7475	-61.3966
305.8	-61.7038	-61.3459
306	-61.6646	-61.2999
306.2	-61.6293	-61.2582
306.4	-61.5979	-61.2209
306.6	-61.57	-61.1874
306.8	-61.5456	-61.1577
307	-61.5243	-61.1315
307.2	-61.5061	-61.1088
307.4	-61.4908	-61.0891
307.6	-61.4782	-61.0725
307.8	-61.4681	-61.0588
308	-61.4606	-61.0478
308.2	-61.4552	-61.0393
308.4	-61.4521	-61.0333
308.6	-61.451	-61.0296
308.8	-61.4519	-61.0281
309	-61.4546	-61.0286
309.2	-61.4591	-61.0312
309.4	-61.4652	-61.0355
309.6	-61.4729	-61.0417
309.8	-61.482	-61.0496
310	-61.4926	-61.059
310.2	-61.5044	-61.0699
310.4	-61.5175	-61.0823
310.6	-61.5317	-61.096
310.8	-61.5471	-61.1111
311	-61.5635	-61.1273
311.2	-61.5808	-61.1447
311.4	-61.5991	-61.1631
311.6	-61.6183	-61.1826
311.8	-61.6382	-61.203
312	-61.659	-61.2243
312.2	-61.6804	-61.2465
312.4	-61.7025	-61.2695
312.6	-61.7252	-61.2932
312.8	-61.7485	-61.3176
313	-61.7724	-61.3427
313.2	-61.7967	-61.3685
313.4	-61.8215	-61.3947
313.6	-61.8468	-61.4216
313.8	-61.8724	-61.4489
314	-61.8985	-61.4767
314.2	-61.9248	-61.505
314.4	-61.9515	-61.5336
314.6	-61.9784	-61.5626
314.8	-62.0057	-61.5919
315	-62.0331	-61.6216
315.2	-62.0607	-61.6515
315.4	-62.0885	-61.6817
315.6	-62.1165	-61.7121
315.8	-62.1446	-61.7427
316	-62.1729	-61.7735
316.2	-62.2012	-61.8045
316.4	-62.2296	-61.8356
316.6	-62.2581	-61.8668
316.8	-62.2867	-61.8981
317	-62.3152	-61.9295
317.2	-62.3438	-61.9609
317.4	-62.3724	-61.9924
317.6	-62.401	-62.024
317.8	-62.4295	-62.0555
318	-62.4581	-62.087
318.2	-62.4865	-62.1186
318.4	-62.515	-62.1501
318.6	-62.5433	-62.1815
318.8	-62.5716	-62.213
319	-62.5998	-62.2443
319.2	-62.6279	-62.2756
319.4	-62.6558	-62.3068
319.6	-62.6837	-62.3379
319.8	-62.7115	-62.3689
320	-62.7391	-62.3998
320.2	-62.7666	-62.4306
320.4	-62.7939	-62.4613
320.6	-62.8211	-62.4918
320.8	-62.8482	-62.5222
321	-62.8751	-62.5524
321.2	-62.9018	-62.5825
321.4	-62.9284	-62.6124
321.6	-62.9548	-62.6422
321.8	-62.981	-62.6717
322	-63.007	-62.7011
322.2	-63.0329	-62.7304
322.4	-63.0585	-62.7594
322.6	-63.084	-62.7882
322.8	-63.1093	-62.8169
323	-63.1344	-62.8454
323.2	-63.1593	-62.8736
323.4	-63.184	-62.9017
323.6	-63.2085	-62.9295
323.8	-63.2327	-62.9572
324	-63.2568	-62.9846
324.2	-63.2807	-63.0118
324.4	-63.3043	-63.0388
324.6	-63.3278	-63.0656
324.8	-63.351	-63.0922
325	-63.374	-63.1185
325.2	-63.3969	-63.1446
325.4	-63.4194	-63.1705
325.6	-63.4418	-63.1962
325.8	-63.464	-63.2216
326	-63.4859	-63.2468
326.2	-63.5077	-63.2718
326.4	-63.5292	-63.2966
326.6	-63.5505	-63.3211
326.8	-63.5715	-63.3454
327	-63.5924	-63.3694
327.2	-63.613	-63.3933
327.4	-63.6335	-63.4169
327.6	-63.6537	-63.4402
327.8	-63.6737	-63.4634
328	-63.6934	-63.4863
328.2	-63.713	-63.509
328.4	-63.7324	-63.5314
328.6	-63.7515	-63.5536
328.8	-63.7704	-63.5756
329	-63.7891	-63.5973
329.2	-63.8076	-63.6189
329.4	-63.8259	-63.6401
329.6	-63.844	-63.6612
329.8	-63.8618	-63.682
330	-63.8795	-63.7026
330.2	-63.8969	-63.723
330.4	-63.9142	-63.7432
330.6	-63.9312	-63.7631
330.8	-63.948	-63.7828
331	-63.9646	-63.8023
331.2	-63.9811	-63.8215
331.4	-63.9973	-63.8406
331.6	-64.0133	-63.8594
331.8	-64.0291	-63.878
332	-64.0448	-63.8964
332.2	-64.0602	-63.9145
332.4	-64.0754	-63.9325
332.6	-64.0905	-63.9502
332.8	-64.1053	-63.9677
333	-64.12	-63.985
333.2	-64.1344	-64.0021
333.4	-64.1487	-64.019
333.6	-64.1628	-64.0357
333.8	-64.1767	-64.0521
334	-64.1905	-64.0684
334.2	-64.204	-64.0844
334.4	-64.2174	-64.1003
334.6	-64.2305	-64.1159
334.8	-64.2435	-64.1314
335	-64.2564	-64.1466
335.2	-64.269	-64.1617
335.4	-64.2815	-64.1765
335.6	-64.2938	-64.1912
335.8	-64.3059	-64.2056
336	-64.3179	-64.2199
336.2	-64.3297	-64.234
336.4	-64.3413	-64.2479
336.6	-64.3528	-64.2616
336.8	-64.3641	-64.2751
337	-64.3752	-64.2884
337.2	-64.3862	-64.3016
337.4	-64.397	-64.3146
337.6	-64.4077	-64.3274
337.8	-64.4182	-64.34
338	-64.4286	-64.3524
338.2	-64.4388	-64.3647
338.4	-64.4488	-64.3767
338.6	-64.4587	-64.3886
338.8	-64.4685	-64.4004
339	-64.4781	-64.412
339.2	-64.4876	-64.4234
339.4	-64.4969	-64.4346
339.6	-64.506	-64.4457
339.8	-64.5151	-64.4566
340	-64.524	-64.4673
340.2	-64.5327	-64.4779
340.4	-64.5414	-64.4883
340.6	-64.5499	-64.4986
340.8	-64.5582	-64.5087
341	-64.5664	-64.5187
341.2	-64.5745	-64.5285
341.4	-64.5825	-64.5381
341.6	-64.5903	-64.5476
341.8	-64.5981	-64.557
342	-64.6056	-64.5662
342.2	-64.6131	-64.5753
342.4	-64.6205	-64.5842
342.6	-64.6277	-64.593
342.8	-64.6348	-64.6016
343	-64.6418	-64.6101
343.2	-64.6486	-64.6185
343.4	-64.6554	-64.6267
343.6	-64.662	-64.6348
343.8	-64.6686	-64.6428
344	-64.675	-64.6506
344.2	-64.6813	-64.6583
344.4	-64.6875	-64.6659
344.6	-64.6936	-64.6733
344.8	-64.6996	-64.6806
345	-64.7055	-64.6878
345.2	-64.7113	-64.6949
345.4	-64.717	-64.7019
345.6	-64.7226	-64.7087
345.8	-64.728	-64.7154
346	-64.7334	-64.722
346.2	-64.7387	-64.7285
346.4	-64.7439	-64.7348
346.6	-64.749	-64.7411
346.8	-64.754	-64.7472
347	-64.759	-64.7533
347.2	-64.7638	-64.7592
347.4	-64.7685	-64.765
347.6	-64.7732	-64.7707
347.8	-64.7778	-64.7763
348	-64.7822	-64.7818
348.2	-64.7866	-64.7872
348.4	-64.7909	-64.7925
348.6	-64.7952	-64.7977
348.8	-64.7993	-64.8028
349	-64.8034	-64.8078
349.2	-64.8074	-64.8127
349.4	-64.8113	-64.8175
349.6	-64.8152	-64.8222
349.8	-64.8189	-64.8268
350	-64.8226	-64.8313
350.2	-64.8262	-64.8358
350.4	-64.7825	-64.8015
350.6	-64.6898	-64.7162
350.8	-64.566	-64.5952
351	-64.4163	-64.4444
351.2	-64.2514	-64.2736
351.4	-64.076	-64.0893
351.6	-63.8967	-63.8983
351.8	-63.7164	-63.7052
352	-63.5394	-63.5141
352.2	-63.367	-63.3276
352.4	-63.2015	-63.148
352.6	-63.0434	-62.9763
352.8	-62.8938	-62.8136
353	-62.7525	-62.6599
353.2	-62.6202	-62.5156
353.4	-62.4961	-62.3804
353.6	-62.3806	-62.2542
353.8	-62.273	-62.1366
354	-62.1733	-62.0273
354.2	-62.0807	-61.9257
354.4	-61.9954	-61.8317
354.6	-61.9166	-61.7447
354.8	-61.8442	-61.6645
355	-61.7777	-61.5905
355.2	-61.7169	-61.5226
355.4	-61.6613	-61.4602
355.6	-61.6108	-61.4033
355.8	-61.5649	-61.3513
356	-61.5237	-61.3041
356.2	-61.4865	-61.2614
356.4	-61.4534	-61.2229
356.6	-61.424	-61.1884
356.8	-61.3982	-61.1578
357	-61.3757	-61.1308
357.2	-61.3564	-61.1072
357.4	-61.34	-61.0867
357.6	-61.3266	-61.0694
357.8	-61.3158	-61.055
358	-61.3075	-61.0433
358.2	-61.3016	-61.0342
358.4	-61.2981	-61.0276
358.6	-61.2966	-61.0233
358.8	-61.2972	-61.0212
359	-61.2996	-61.0213
359.2	-61.304	-61.0233
359.4	-61.31	-61.0273
359.6	-61.3176	-61.033
359.8	-61.3268	-61.0405
360	-61.3375	-61.0495
360.2	-61.3494	-61.0601
360.4	-61.3627	-61.0722
360.6	-61.3772	-61.0855
360.8	-61.3929	-61.1003
361	-61.4096	-61.1162
361.2	-61.4274	-61.1333
361.4	-61.4461	-61.1514
361.6	-61.4658	-61.1707
361.8	-61.4862	-61.1908
362	-61.5075	-61.212
362.2	-61.5295	-61.2339
362.4	-61.5523	-61.2567
362.6	-61.5756	-61.2803
362.8	-61.5997	-61.3045
363	-61.6242	-61.3295
363.2	-61.6493	-61.3551
363.4	-61.6748	-61.3812
363.6	-61.7009	-61.4079
363.8	-61.7273	-61.4351
364	-61.7542	-61.4628
364.2	-61.7814	-61.4909
364.4	-61.8089	-61.5195
364.6	-61.8367	-61.5484
364.8	-61.8648	-61.5776
365	-61.8931	-61.6072
365.2	-61.9217	-61.6371
365.4	-61.9504	-61.6672
365.6	-61.9793	-61.6975
365.8	-62.0084	-61.7281
366	-62.0376	-61.7588
366.2	-62.0669	-61.7897
366.4	-62.0963	-61.8208
366.6	-62.1257	-61.8519
366.8	-62.1553	-61.8832
367	-62.1848	-61.9146
367.2	-62.2144	-61.946
367.4	-62.244	-61.9775
367.6	-62.2736	-62.009
367.8	-62.3031	-62.0405
368	-62.3327	-62.072
368.2	-62.3621	-62.1035
368.4	-62.3916	-62.1351
368.6	-62.4209	-62.1665
368.8	-62.4502	-62.1979
369	-62.4794	-62.2293
369.2	-62.5085	-62.2606
369.4	-62.5375	-62.2918
369.6	-62.5664	-62.3229
369.8	-62.5952	-62.3539
370	-62.6238	-62.3848
370.2	-62.6523	-62.4156
370.4	-62.6807	-62.4462
370.6	-62.7089	-62.4768
370.8	-62.7369	-62.5072
371	-62.7648	-62.5374
371.2	-62.7926	-62.5675
371.4	-62.8201	-62.5974
371.6	-62.8475	-62.6272
371.8	-62.8747	-62.6568
372	-62.9017	-62.6862
372.2	-62.9285	-62.7154
372.4	-62.9552	-62.7445
372.6	-62.9816	-62.7734
372.8	-63.0079	-62.802
373	-63.0339	-62.8305
373.2	-63.0598	-62.8588
373.4	-63.0854	-62.8869
373.6	-63.1109	-62.9148
373.8	-63.1361	-62.9424
374	-63.1611	-62.9699
374.2	-63.1859	-62.9971
374.4	-63.2105	-63.0241
374.6	-63.2348	-63.0509
374.8	-63.259	-63.0775
375	-63.2829	-63.1039
375.2	-63.3066	-63.13
375.4	-63.3301	-63.1559
375.6	-63.3534	-63.1816
375.8	-63.3764	-63.2071
376	-63.3993	-63.2324
376.2	-63.4219	-63.2574
376.4	-63.4442	-63.2821
376.6	-63.4664	-63.3067
376.8	-63.4883	-63.331
377	-63.51	-63.3551
377.2	-63.5315	-63.379
377.4	-63.5528	-63.4026
377.6	-63.5738	-63.426
377.8	-63.5946	-63.4491
378	-63.6153	-63.4721
378.2	-63.6356	-63.4948
378.4	-63.6558	-63.5173
378.6	-63.6757	-63.5395
378.8	-63.6954	-63.5615
379	-63.7149	-63.5833
379.2	-63.7342	-63.6048
379.4	-63.7533	-63.6262
379.6	-63.7721	-63.6472
379.8	-63.7907	-63.6681
380	-63.8091	-63.6887
380.2	-63.8273	-63.7092
380.4	-63.8453	-63.7293
380.6	-63.8631	-63.7493
380.8	-63.8807	-63.769
381	-63.898	-63.7885
381.2	-63.9152	-63.8078
381.4	-63.9321	-63.8269
381.6	-63.9488	-63.8457
381.8	-63.9653	-63.8644
382	-63.9817	-63.8828
382.2	-63.9978	-63.901
382.4	-64.0137	-63.919
382.6	-64.0294	-63.9367
382.8	-64.045	-63.9543
383	-64.0603	-63.9716
383.2	-64.0754	-63.9887
383.4	-64.0903	-64.0056
383.6	-64.1051	-64.0223
383.8	-64.1196	-64.0388
384	-64.134	-64.0551
384.2	-64.1482	-64.0712
384.4	-64.1622	-64.0871
384.6	-64.176	-64.1028
384.8	-64.1896	-64.1183
385	-64.203	-64.1335
385.2	-64.2163	-64.1486
385.4	-64.2293	-64.1635
385.6	-64.2422	-64.1782
385.8	-64.255	-64.1927
386	-64.2675	-64.207
386.2	-64.2799	-64.2211
386.4	-64.2921	-64.2351
386.6	-64.3041	-64.2488
386.8	-64.316	-64.2624
387	-64.3277	-64.2757
387.2	-64.3392	-64.2889
387.4	-64.3506	-64.3019
387.6	-64.3618	-64.3147
387.8	-64.3728	-64.3274
388	-64.3837	-64.3399
388.2	-64.3944	-64.3522
388.4	-64.405	-64.3643
388.6	-64.4154	-64.3762
388.8	-64.4257	-64.388
389	-64.4358	-64.3996
389.2	-64.4457	-64.411
389.4	-64.4555	-64.4223
389.6	-64.4652	-64.4334
389.8	-64.4747	-64.4444
390	-64.4841	-64.4552
390.2	-64.4933	-64.4658
390.4	-64.5024	-64.4763
390.6	-64.5114	-64.4866
390.8	-64.5202	-64.4967
391	-64.5289	-64.5067
391.2	-64.5374	-64.5166
391.4	-64.5458	-64.5263
391.6	-64.5541	-64.5358
391.8	-64.5622	-64.5452
392	-64.5703	-64.5545
392.2	-64.5782	-64.5636
392.4	-64.5859	-64.5725
392.6	-64.5936	-64.5814
392.8	-64.6011	-64.59
393	-64.6085	-64.5986
393.2	-64.6157	-64.607
393.4	-64.6229	-64.6153
393.6	-64.6299	-64.6234
393.8	-64.6369	-64.6314
394	-64.6437	-64.6393
394.2	-64.6504	-64.647
394.4	-64.6569	-64.6546
394.6	-64.6634	-64.6621
394.8	-64.6698	-64.6695
395	-64.676	-64.6767
395.2	-64.6822	-64.6838
395.4	-64.6882	-64.6908
395.6	-64.6942	-64.6977
395.8	-64.7	-64.7045
396	-64.7057	-64.7111
396.2	-64.7114	-64.7176
396.4	-64.7169	-64.724
396.6	-64.7223	-64.7303
396.8	-64.7277	-64.7365
397	-64.7329	-64.7426
397.2	-64.7381	-64.7485
397.4	-64.7431	-64.7544
397.6	-64.7481	-64.7601
397.8	-64.753	-64.7658
398	-64.7578	-64.7713
398.2	-64.7625	-64.7768
398.4	-64.7671	-64.7821
398.6	-64.7716	-64.7873
398.8	-64.7761	-64.7925
399	-64.7804	-64.7975
399.2	-64.7847	-64.8025
399.4	-64.7889	-64.8073
399.6	-64.793	-64.8121
[truncated: 1,982 more rows]

## Sheet: Supplement 1B
X_Uniform Pr	Y_Uniform Pr	X_Pr / PPR trend	Y_Pr / PPR trend
1.0405	398	2.00143	421
1.03376	431	1.96496	443
1.04339	382	2.00947	475
1.10832	430	1.94978	433
0.98348	398	2.00615	460
1.00804	473	2.01887	513
0.98179	368	2.10259	435
0.99896	403	1.93052	500
0.9205	434	1.97396	442
0.98127	335	1.98136	480
1.04587	483	1.93189	439
1.03118	387	2.10267	504
0.9598	465	1.96943	461
1.06037	483	1.96014	472
1.06502	481	2.05698	399
0.95086	354	2.02331	433
1.0051	481	1.99285	432
0.92386	358	2.09939	501
1.05496	371	1.93554	443
0.92679	353	2.01895	504
0.96452	316	2.1207	535
0.97431	477	2.02261	441
0.89892	386	1.97144	437
0.94964	355	1.9797	542
0.92162	370	2.06385	508
1.05537	298	1.94726	478
1.00191	427	2.05205	454
0.91289	452	1.91939	412
1.00935	388	1.98631	503
0.96383	416	1.99946	484
1.01363	377	1.99764	440
0.98532	427	1.9363	433
0.92266	309	1.98745	439
1.01861	419	1.92478	413
1.05138	402	1.98	461
1.00717	450	1.90865	422
0.90175	360	1.91087	454
0.92094	418	1.99123	473
1.01495	376	2.01071	499
0.98462	443	1.94497	415
1.0602	369	1.9746	445
1.05023	388	2.04075	408
1.02971	334	1.86974	436
1.07748	393	2.0605	493
0.91172	401	2.0549	636
0.99286	488	2.09331	503
1.02788	392	2.01139	515
1.01776	456	1.99572	431
0.96229	437	1.97243	451
0.97892	370	2.01228	543
1.01802	476	2.14002	403
0.97358	390	1.92671	423
1.08267	371	1.94087	498
1.05107	383	1.97881	376
0.96004	439	1.9686	489
0.99197	441	1.96463	444
0.99788	407	1.97195	504
1.01463	368	2.00141	457
0.99129	342	2.03273	406
1.03461	342	2.01185	477
0.98012	415	2.02499	442
0.99725	431	2.05093	539
1.00445	401	2.03211	471
1.01587	372	2.02468	404
0.97659	417	1.96727	483
1.01705	467	1.9542	546
1.10318	416	2.01561	488
1.03296	412	2.07521	454
0.97262	367	1.88216	497
0.90259	401	2.03633	447
1.02043	332	2.05734	454
0.95686	441	1.94808	458
1.02622	426	1.92654	493
1.04201	390	2.01486	450
0.99732	342	1.9948	460
0.98759	387	1.99435	495
0.9551	449	2.04295	486
1.08821	490	1.97744	445
1.02876	400	1.95143	466
1.01622	446	1.94145	489
1	332	2.02117	511
1.01819	508	2.07673	443
0.96286	346	2.02074	386
0.92568	430	1.98219	443
0.9357	393	2.02304	462
0.98199	441	2.01591	519
0.99696	353	1.97602	411
0.92139	408	2.0108	499
0.93002	317	1.96097	450
0.99804	426	2.03253	499
1.0146	421	2.06781	411
0.95325	514	1.96359	433
0.90828	466	1.99276	493
1.04608	422	2.02165	494
1.00502	454	2.0963	413
1.10038	380	2.10199	487
1.02774	379	1.97477	523
0.96209	433	1.94706	419
0.93584	410	1.94111	496
	355		542

## Sheet: Supplement 1D
Simulations				Experiment
X_Time, ms	Y_Uniform	Y_Slope trend		X_Time, ms	Y_mV
-299	-63.7	-63.7		1000	-62.4203
-298	-65.2193	-65.2193		2000	-62.5359
-297	-63.1998	-63.1998		3000	-62.6052
-296	-64.1187	-64.1187		4000	-62.6376
-295	-62.7605	-62.7605		5000	-62.6538
-294	-63.5368	-63.5368		6000	-62.6699
-293	-62.5494	-62.5494		7000	-62.6722
-292	-63.2308	-63.2308		8000	-62.6746
-291	-62.4886	-62.4886		9000	-62.6746
-290	-63.0986	-63.0986		10000	-62.6746
-289	-62.5254	-62.5254
-288	-63.0755	-63.0755
-287	-62.6209	-62.6209
-286	-63.118	-63.118
-285	-62.7481	-62.7481
-284	-63.1976	-63.1976
-283	-62.8889	-62.8889
-282	-63.2956	-63.2956
-281	-63.0319	-63.0319
-280	-63.4001	-63.4001
-279	-63.1701	-63.1701
-278	-63.5039	-63.5039
-277	-63.2994	-63.2994
-276	-63.6024	-63.6024
-275	-63.4178	-63.4178
-274	-63.6935	-63.6935
-273	-63.5246	-63.5246
-272	-63.7758	-63.7758
-271	-63.6197	-63.6197
-270	-63.8492	-63.8492
-269	-63.7036	-63.7036
-268	-63.9139	-63.9139
-267	-63.7771	-63.7771
-266	-63.9702	-63.9702
-265	-63.841	-63.841
-264	-64.0189	-64.0189
-263	-63.8964	-63.8964
-262	-64.0606	-64.0606
-261	-63.9441	-63.9441
-260	-64.0961	-64.0961
-259	-63.985	-63.985
-258	-64.1262	-64.1262
-257	-64.0199	-64.0199
-256	-64.1514	-64.1514
-255	-64.0497	-64.0497
-254	-64.1724	-64.1724
-253	-64.0749	-64.0749
-252	-64.1897	-64.1897
-251	-64.0962	-64.0962
-250	-64.204	-64.204
-249	-64.1142	-64.1142
-248	-64.2155	-64.2155
-247	-64.1293	-64.1293
-246	-64.2248	-64.2248
-245	-64.1419	-64.1419
-244	-64.2321	-64.2321
-243	-64.1524	-64.1524
-242	-64.2378	-64.2378
-241	-64.1612	-64.1612
-240	-64.2422	-64.2422
-239	-64.1684	-64.1684
-238	-64.2454	-64.2454
-237	-64.1744	-64.1744
-236	-64.2477	-64.2477
-235	-64.1793	-64.1793
-234	-64.2492	-64.2492
-233	-64.1833	-64.1833
-232	-64.2501	-64.2501
-231	-64.1866	-64.1866
-230	-64.2504	-64.2504
-229	-64.1892	-64.1892
-228	-64.2504	-64.2504
-227	-64.1913	-64.1913
-226	-64.25	-64.25
-225	-64.193	-64.193
-224	-64.2494	-64.2494
-223	-64.1943	-64.1943
-222	-64.2485	-64.2485
-221	-64.1954	-64.1954
-220	-64.2475	-64.2475
-219	-64.1962	-64.1962
-218	-64.2464	-64.2464
-217	-64.1968	-64.1968
-216	-64.2453	-64.2453
-215	-64.1973	-64.1973
-214	-64.2441	-64.2441
-213	-64.1976	-64.1976
-212	-64.2428	-64.2428
-211	-64.1979	-64.1979
-210	-64.2416	-64.2416
-209	-64.1981	-64.1981
-208	-64.2403	-64.2403
-207	-64.1982	-64.1982
-206	-64.2391	-64.2391
-205	-64.1983	-64.1983
-204	-64.2379	-64.2379
-203	-64.1983	-64.1983
-202	-64.2368	-64.2368
-201	-64.1983	-64.1983
-200	-64.2356	-64.2356
-199	-64.1983	-64.1983
-198	-64.2345	-64.2345
-197	-64.1983	-64.1983
-196	-64.2335	-64.2335
-195	-64.1983	-64.1983
-194	-64.2325	-64.2325
-193	-64.1983	-64.1983
-192	-64.2315	-64.2315
-191	-64.1983	-64.1983
-190	-64.2306	-64.2306
-189	-64.1983	-64.1983
-188	-64.2297	-64.2297
-187	-64.1983	-64.1983
-186	-64.2289	-64.2289
-185	-64.1983	-64.1983
-184	-64.2281	-64.2281
-183	-64.1984	-64.1984
-182	-64.2274	-64.2274
-181	-64.1984	-64.1984
-180	-64.2267	-64.2267
-179	-64.1984	-64.1984
-178	-64.226	-64.226
-177	-64.1985	-64.1985
-176	-64.2253	-64.2253
-175	-64.1985	-64.1985
-174	-64.2247	-64.2247
-173	-64.1986	-64.1986
-172	-64.2242	-64.2242
-171	-64.1986	-64.1986
-170	-64.2236	-64.2236
-169	-64.1987	-64.1987
-168	-64.2231	-64.2231
-167	-64.1988	-64.1988
-166	-64.2226	-64.2226
-165	-64.1988	-64.1988
-164	-64.2222	-64.2222
-163	-64.1989	-64.1989
-162	-64.2217	-64.2217
-161	-64.199	-64.199
-160	-64.2213	-64.2213
-159	-64.1991	-64.1991
-158	-64.2209	-64.2209
-157	-64.1992	-64.1992
-156	-64.2205	-64.2205
-155	-64.1993	-64.1993
-154	-64.2202	-64.2202
-153	-64.1994	-64.1994
-152	-64.2198	-64.2198
-151	-64.1995	-64.1995
-150	-64.2195	-64.2195
-149	-64.1996	-64.1996
-148	-64.2192	-64.2192
-147	-64.1997	-64.1997
-146	-64.2189	-64.2189
-145	-64.1998	-64.1998
-144	-64.2186	-64.2186
-143	-64.1999	-64.1999
-142	-64.2183	-64.2183
-141	-64.2	-64.2
-140	-64.2181	-64.2181
-139	-64.2001	-64.2001
-138	-64.2178	-64.2178
-137	-64.2002	-64.2002
-136	-64.2176	-64.2176
-135	-64.2003	-64.2003
-134	-64.2174	-64.2174
-133	-64.2004	-64.2004
-132	-64.2172	-64.2172
-131	-64.2006	-64.2006
-130	-64.217	-64.217
-129	-64.2007	-64.2007
-128	-64.2168	-64.2168
-127	-64.2008	-64.2008
-126	-64.2166	-64.2166
-125	-64.2009	-64.2009
-124	-64.2164	-64.2164
-123	-64.201	-64.201
-122	-64.2162	-64.2162
-121	-64.2011	-64.2011
-120	-64.2161	-64.2161
-119	-64.2012	-64.2012
-118	-64.2159	-64.2159
-117	-64.2013	-64.2013
-116	-64.2158	-64.2158
-115	-64.2014	-64.2014
-114	-64.2156	-64.2156
-113	-64.2015	-64.2015
-112	-64.2155	-64.2155
-111	-64.2016	-64.2016
-110	-64.2153	-64.2153
-109	-64.2016	-64.2016
-108	-64.2152	-64.2152
-107	-64.2017	-64.2017
-106	-64.2151	-64.2151
-105	-64.2018	-64.2018
-104	-64.2149	-64.2149
-103	-64.2019	-64.2019
-102	-64.2148	-64.2148
-101	-64.202	-64.202
-100	-64.2147	-64.2147
-99	-64.2021	-64.2021
-98	-64.2146	-64.2146
-97	-64.2022	-64.2022
-96	-64.2145	-64.2145
-95	-64.2023	-64.2023
-94	-64.2144	-64.2144
-93	-64.2023	-64.2023
-92	-64.2143	-64.2143
-91	-64.2024	-64.2024
-90	-64.2142	-64.2142
-89	-64.2025	-64.2025
-88	-64.2141	-64.2141
-87	-64.2026	-64.2026
-86	-64.214	-64.214
-85	-64.2027	-64.2027
-84	-64.2139	-64.2139
-83	-64.2027	-64.2027
-82	-64.2138	-64.2138
-81	-64.2028	-64.2028
-80	-64.2137	-64.2137
-79	-64.2029	-64.2029
-78	-64.2136	-64.2136
-77	-64.2029	-64.2029
-76	-64.2136	-64.2136
-75	-64.203	-64.203
-74	-64.2135	-64.2135
-73	-64.2031	-64.2031
-72	-64.2134	-64.2134
-71	-64.2031	-64.2031
-70	-64.2133	-64.2133
-69	-64.2032	-64.2032
-68	-64.2133	-64.2133
-67	-64.2033	-64.2033
-66	-64.2132	-64.2132
-65	-64.2033	-64.2033
-64	-64.2131	-64.2131
-63	-64.2034	-64.2034
-62	-64.2131	-64.2131
-61	-64.2035	-64.2035
-60	-64.213	-64.213
-59	-64.2035	-64.2035
-58	-64.2129	-64.2129
-57	-64.2036	-64.2036
-56	-64.2129	-64.2129
-55	-64.2036	-64.2036
-54	-64.2128	-64.2128
-53	-64.2037	-64.2037
-52	-64.2127	-64.2127
-51	-64.2037	-64.2037
-50	-64.2127	-64.2127
-49	-64.2038	-64.2038
-48	-64.2126	-64.2126
-47	-64.2038	-64.2038
-46	-64.2126	-64.2126
-45	-64.2039	-64.2039
-44	-64.2125	-64.2125
-43	-64.2039	-64.2039
-42	-64.2125	-64.2125
-41	-64.204	-64.204
-40	-64.2124	-64.2124
-39	-64.204	-64.204
-38	-64.2124	-64.2124
-37	-64.2041	-64.2041
-36	-64.2123	-64.2123
-35	-64.2041	-64.2041
-34	-64.2123	-64.2123
-33	-64.2042	-64.2042
-32	-64.2122	-64.2122
-31	-64.2042	-64.2042
-30	-64.2122	-64.2122
-29	-64.2043	-64.2043
-28	-64.2121	-64.2121
-27	-64.2043	-64.2043
-26	-64.2121	-64.2121
-25	-64.2043	-64.2043
-24	-64.212	-64.212
-23	-64.2044	-64.2044
-22	-64.212	-64.212
-21	-64.2044	-64.2044
-20	-64.212	-64.212
-19	-64.2045	-64.2045
-18	-64.2119	-64.2119
-17	-64.2045	-64.2045
-16	-64.2119	-64.2119
-15	-64.2045	-64.2045
-14	-64.2118	-64.2118
-13	-64.2046	-64.2046
-12	-64.2118	-64.2118
-11	-64.2046	-64.2046
-10	-64.2118	-64.2118
-9	-64.2047	-64.2047
-8	-64.2117	-64.2117
-7	-64.2047	-64.2047
-6	-64.2117	-64.2117
-5	-64.2047	-64.2047
-4	-64.2117	-64.2117
-3	-64.2048	-64.2048
-2	-64.2116	-64.2116
-1	-64.2048	-64.2048
0	-64.2116	-64.2116
1	-64.2048	-64.2048
2	-64.2116	-64.2116
3	-64.2049	-64.2049
4	-64.2115	-64.2115
5	-64.2049	-64.2049
6	-64.2115	-64.2115
7	-64.2049	-64.2049
8	-64.2115	-64.2115
9	-64.205	-64.205
10	-64.2114	-64.2114
11	-64.205	-64.205
12	-64.2114	-64.2114
13	-64.205	-64.205
14	-64.2114	-64.2114
15	-64.205	-64.205
16	-64.2113	-64.2113
17	-64.2051	-64.2051
18	-64.2113	-64.2113
19	-64.2051	-64.2051
20	-64.2113	-64.2113
21	-64.2051	-64.2051
22	-64.2113	-64.2113
23	-64.2052	-64.2052
24	-64.2112	-64.2112
25	-64.2052	-64.2052
26	-64.2112	-64.2112
27	-64.2052	-64.2052
28	-64.2112	-64.2112
29	-64.2052	-64.2052
30	-64.2112	-64.2112
31	-64.2053	-64.2053
32	-64.2111	-64.2111
33	-64.2053	-64.2053
34	-64.2111	-64.2111
35	-64.2053	-64.2053
36	-64.2111	-64.2111
37	-64.2053	-64.2053
38	-64.2111	-64.2111
39	-64.2054	-64.2054
40	-64.211	-64.211
41	-64.2054	-64.2054
42	-64.211	-64.211
43	-64.2054	-64.2054
44	-64.211	-64.211
45	-64.2054	-64.2054
46	-64.211	-64.211
47	-64.2054	-64.2054
48	-64.2109	-64.2109
49	-64.2055	-64.2055
50	-64.2109	-64.2109
51	-64.2055	-64.2055
52	-64.2109	-64.2109
53	-64.2055	-64.2055
54	-64.2109	-64.2109
55	-64.2055	-64.2055
56	-64.2109	-64.2109
57	-64.2056	-64.2056
58	-64.2108	-64.2108
59	-64.2056	-64.2056
60	-64.2108	-64.2108
61	-64.2056	-64.2056
62	-64.2108	-64.2108
63	-64.2056	-64.2056
64	-64.2108	-64.2108
65	-64.2056	-64.2056
66	-64.2108	-64.2108
67	-64.2057	-64.2057
68	-64.2107	-64.2107
69	-64.2057	-64.2057
70	-64.2107	-64.2107
71	-64.2057	-64.2057
72	-64.2107	-64.2107
73	-64.2057	-64.2057
74	-64.2107	-64.2107
75	-64.2057	-64.2057
76	-64.2107	-64.2107
77	-64.2057	-64.2057
78	-64.2106	-64.2106
79	-64.2058	-64.2058
80	-64.2106	-64.2106
81	-64.2058	-64.2058
82	-64.2106	-64.2106
83	-64.2058	-64.2058
84	-64.2106	-64.2106
85	-64.2058	-64.2058
86	-64.2106	-64.2106
87	-64.2058	-64.2058
88	-64.2106	-64.2106
89	-64.2058	-64.2058
90	-64.2105	-64.2105
91	-64.2059	-64.2059
92	-64.2105	-64.2105
93	-64.2059	-64.2059
94	-64.2105	-64.2105
95	-64.2059	-64.2059
96	-64.2105	-64.2105
97	-64.2059	-64.2059
98	-64.2105	-64.2105
99	-64.2059	-64.2059
100	-64.2105	-64.2105
101	-64.2059	-64.2059
102	-64.2104	-64.2104
103	-64.206	-64.206
104	-64.2104	-64.2104
105	-64.206	-64.206
106	-64.2104	-64.2104
107	-64.206	-64.206
108	-64.2104	-64.2104
109	-64.206	-64.206
110	-64.2104	-64.2104
111	-64.206	-64.206
112	-64.2104	-64.2104
113	-64.206	-64.206
114	-64.2104	-64.2104
115	-64.206	-64.206
116	-64.2103	-64.2103
117	-64.2061	-64.2061
118	-64.2103	-64.2103
119	-64.2061	-64.2061
120	-64.2103	-64.2103
121	-64.2061	-64.2061
122	-64.2103	-64.2103
123	-64.2061	-64.2061
124	-64.2103	-64.2103
125	-64.2061	-64.2061
126	-64.2103	-64.2103
127	-64.2061	-64.2061
128	-64.2103	-64.2103
129	-64.2061	-64.2061
130	-64.2103	-64.2103
131	-64.2061	-64.2061
132	-64.2102	-64.2102
133	-64.2062	-64.2062
134	-64.2102	-64.2102
135	-64.2062	-64.2062
136	-64.2102	-64.2102
137	-64.2062	-64.2062
138	-64.2102	-64.2102
139	-64.2062	-64.2062
140	-64.2102	-64.2102
141	-64.2062	-64.2062
142	-64.2102	-64.2102
143	-64.2062	-64.2062
144	-64.2102	-64.2102
145	-64.2062	-64.2062
146	-64.2102	-64.2102
147	-64.2062	-64.2062
148	-64.2101	-64.2101
149	-64.2063	-64.2063
150	-64.2101	-64.2101
151	-64.2063	-64.2063
152	-64.2101	-64.2101
153	-64.2063	-64.2063
154	-64.2101	-64.2101
155	-64.2063	-64.2063
156	-64.2101	-64.2101
157	-64.2063	-64.2063
158	-64.2101	-64.2101
159	-64.2063	-64.2063
160	-64.2101	-64.2101
161	-64.2063	-64.2063
162	-64.2101	-64.2101
163	-64.2063	-64.2063
164	-64.2101	-64.2101
165	-64.2063	-64.2063
166	-64.2101	-64.2101
167	-64.2063	-64.2063
168	-64.21	-64.21
169	-64.2064	-64.2064
170	-64.21	-64.21
171	-64.2064	-64.2064
172	-64.21	-64.21
173	-64.2064	-64.2064
174	-64.21	-64.21
175	-64.2064	-64.2064
176	-64.21	-64.21
177	-64.2064	-64.2064
178	-64.21	-64.21
179	-64.2064	-64.2064
180	-64.21	-64.21
181	-64.2064	-64.2064
182	-64.21	-64.21
183	-64.2064	-64.2064
184	-64.21	-64.21
185	-64.2064	-64.2064
186	-64.21	-64.21
187	-64.2064	-64.2064
188	-64.2099	-64.2099
189	-64.2064	-64.2064
190	-64.2099	-64.2099
191	-64.2065	-64.2065
192	-64.2099	-64.2099
193	-64.2065	-64.2065
194	-64.2099	-64.2099
195	-64.2065	-64.2065
196	-64.2099	-64.2099
197	-64.2065	-64.2065
198	-64.2099	-64.2099
199	-64.2065	-64.2065
200	-64.2099	-64.2099
201	-64.2065	-64.2065
202	-64.2099	-64.2099
203	-64.2065	-64.2065
204	-64.2099	-64.2099
205	-64.2065	-64.2065
206	-64.2099	-64.2099
207	-64.2065	-64.2065
208	-64.2099	-64.2099
209	-64.2065	-64.2065
210	-64.2099	-64.2099
211	-64.2065	-64.2065
212	-64.2098	-64.2098
213	-64.2066	-64.2066
214	-64.2098	-64.2098
215	-64.2066	-64.2066
216	-64.2098	-64.2098
217	-64.2066	-64.2066
218	-64.2098	-64.2098
219	-64.2066	-64.2066
220	-64.2098	-64.2098
221	-64.2066	-64.2066
222	-64.2098	-64.2098
223	-64.2066	-64.2066
224	-64.2098	-64.2098
225	-64.2066	-64.2066
226	-64.2098	-64.2098
227	-64.2066	-64.2066
228	-64.2098	-64.2098
229	-64.2066	-64.2066
230	-64.2098	-64.2098
231	-64.2066	-64.2066
232	-64.2098	-64.2098
233	-64.2066	-64.2066
234	-64.2098	-64.2098
235	-64.2066	-64.2066
236	-64.2098	-64.2098
237	-64.2066	-64.2066
238	-64.2097	-64.2097
239	-64.2066	-64.2066
240	-64.2097	-64.2097
241	-64.2067	-64.2067
242	-64.2097	-64.2097
243	-64.2067	-64.2067
244	-64.2097	-64.2097
245	-64.2067	-64.2067
246	-64.2097	-64.2097
247	-64.2067	-64.2067
248	-64.2097	-64.2097
249	-64.2067	-64.2067
250	-64.2097	-64.2097
251	-64.2067	-64.2067
252	-64.2097	-64.2097
253	-64.2067	-64.2067
254	-64.2097	-64.2097
255	-64.2067	-64.2067
256	-64.2097	-64.2097
257	-64.2067	-64.2067
258	-64.2097	-64.2097
259	-64.2067	-64.2067
260	-64.2097	-64.2097
261	-64.2067	-64.2067
262	-64.2097	-64.2097
263	-64.2067	-64.2067
264	-64.2097	-64.2097
265	-64.2067	-64.2067
266	-64.2097	-64.2097
267	-64.2067	-64.2067
268	-64.2097	-64.2097
269	-64.2067	-64.2067
270	-64.2096	-64.2096
271	-64.2068	-64.2068
272	-64.2096	-64.2096
273	-64.2068	-64.2068
274	-64.2096	-64.2096
275	-64.2068	-64.2068
276	-64.2096	-64.2096
277	-64.2068	-64.2068
278	-64.2096	-64.2096
279	-64.2068	-64.2068
280	-64.2096	-64.2096
281	-64.2068	-64.2068
282	-64.2096	-64.2096
283	-64.2068	-64.2068
284	-64.2096	-64.2096
285	-64.2068	-64.2068
286	-64.2096	-64.2096
287	-64.2068	-64.2068
288	-64.2096	-64.2096
289	-64.2068	-64.2068
290	-64.2096	-64.2096
291	-64.2068	-64.2068
292	-64.2096	-64.2096
293	-64.2068	-64.2068
294	-64.2096	-64.2096
295	-64.2068	-64.2068
296	-64.2096	-64.2096
297	-64.2068	-64.2068
298	-64.2096	-64.2096
299	-64.2068	-64.2068
300	-64.2096	-64.2096
301	-64.2068	-64.2068
302	-64.2096	-64.2096
303	-64.2068	-64.2068
304	-64.2095	-64.2095
305	-64.2068	-64.2068
306	-64.2095	-64.2095
307	-64.2069	-64.2069
308	-64.2095	-64.2095
309	-64.2069	-64.2069
310	-64.2095	-64.2095
311	-64.2069	-64.2069
312	-64.2095	-64.2095
313	-64.2069	-64.2069
314	-64.2095	-64.2095
315	-64.2069	-64.2069
316	-64.2095	-64.2095
317	-64.2069	-64.2069
318	-64.2095	-64.2095
319	-64.2069	-64.2069
320	-64.2095	-64.2095
321	-64.2069	-64.2069
322	-64.2095	-64.2095
323	-64.2069	-64.2069
324	-64.2095	-64.2095
325	-64.2069	-64.2069
326	-64.2095	-64.2095
327	-64.2069	-64.2069
328	-64.2095	-64.2095
329	-64.2069	-64.2069
330	-64.2095	-64.2095
331	-64.2069	-64.2069
332	-64.2095	-64.2095
333	-64.2069	-64.2069
334	-64.2095	-64.2095
335	-64.2069	-64.2069
336	-64.2095	-64.2095
337	-64.2069	-64.2069
338	-64.2095	-64.2095
339	-64.2069	-64.2069
340	-64.2095	-64.2095
341	-64.2069	-64.2069
342	-64.2095	-64.2095
343	-64.2069	-64.2069
344	-64.2094	-64.2094
345	-64.2069	-64.2069
346	-64.2094	-64.2094
347	-64.207	-64.207
348	-64.2094	-64.2094
349	-64.207	-64.207
350	-64.2094	-64.2094
351	-64.207	-64.207
352	-64.2094	-64.2094
353	-64.207	-64.207
354	-64.2094	-64.2094
355	-64.207	-64.207
356	-64.2094	-64.2094
357	-64.207	-64.207
358	-64.2094	-64.2094
359	-64.207	-64.207
360	-64.2094	-64.2094
361	-64.207	-64.207
362	-64.2094	-64.2094
363	-64.207	-64.207
364	-64.2094	-64.2094
365	-64.207	-64.207
366	-64.2094	-64.2094
367	-64.207	-64.207
368	-64.2094	-64.2094
369	-64.207	-64.207
370	-64.2094	-64.2094
371	-64.207	-64.207
372	-64.2094	-64.2094
373	-64.207	-64.207
374	-64.2094	-64.2094
375	-64.207	-64.207
376	-64.2094	-64.2094
377	-64.207	-64.207
378	-64.2094	-64.2094
379	-64.207	-64.207
380	-64.2094	-64.2094
381	-64.207	-64.207
382	-64.2094	-64.2094
383	-64.207	-64.207
384	-64.2094	-64.2094
385	-64.207	-64.207
386	-64.2094	-64.2094
387	-64.207	-64.207
388	-64.2094	-64.2094
389	-64.207	-64.207
390	-64.2093	-64.2093
391	-64.207	-64.207
392	-64.2093	-64.2093
393	-64.2071	-64.2071
394	-64.2093	-64.2093
395	-64.2071	-64.2071
396	-64.2093	-64.2093
397	-64.2071	-64.2071
398	-64.2093	-64.2093
399	-64.2071	-64.2071
400	-64.2093	-64.2093
401	-64.2071	-64.2071
402	-64.2093	-64.2093
403	-64.2071	-64.2071
404	-64.2093	-64.2093
405	-64.2071	-64.2071
406	-64.2093	-64.2093
407	-64.2071	-64.2071
408	-64.2093	-64.2093
409	-64.2071	-64.2071
410	-64.2093	-64.2093
411	-64.2071	-64.2071
412	-64.2093	-64.2093
413	-64.2071	-64.2071
414	-64.2093	-64.2093
415	-64.2071	-64.2071
416	-64.2093	-64.2093
417	-64.2071	-64.2071
418	-64.2093	-64.2093
419	-64.2071	-64.2071
420	-64.2093	-64.2093
421	-64.2071	-64.2071
422	-64.2093	-64.2093
423	-64.2071	-64.2071
424	-64.2093	-64.2093
425	-64.2071	-64.2071
426	-64.2093	-64.2093
427	-64.2071	-64.2071
428	-64.2093	-64.2093
429	-64.2071	-64.2071
430	-64.2093	-64.2093
431	-64.2071	-64.2071
432	-64.2093	-64.2093
433	-64.2071	-64.2071
434	-64.2093	-64.2093
435	-64.2071	-64.2071
436	-64.2093	-64.2093
437	-64.2071	-64.2071
438	-64.2093	-64.2093
439	-64.2071	-64.2071
440	-64.2093	-64.2093
441	-64.2071	-64.2071
442	-64.2093	-64.2093
443	-64.2071	-64.2071
444	-64.2092	-64.2092
445	-64.2071	-64.2071
446	-64.2092	-64.2092
447	-64.2071	-64.2071
448	-64.2092	-64.2092
449	-64.2072	-64.2072
450	-64.2092	-64.2092
451	-64.2072	-64.2072
452	-64.2092	-64.2092
453	-64.2072	-64.2072
454	-64.2092	-64.2092
455	-64.2072	-64.2072
456	-64.2092	-64.2092
457	-64.2072	-64.2072
458	-64.2092	-64.2092
459	-64.2072	-64.2072
460	-64.2092	-64.2092
461	-64.2072	-64.2072
462	-64.2092	-64.2092
463	-64.2072	-64.2072
464	-64.2092	-64.2092
465	-64.2072	-64.2072
466	-64.2092	-64.2092
467	-64.2072	-64.2072
468	-64.2092	-64.2092
469	-64.2072	-64.2072
470	-64.2092	-64.2092
471	-64.2072	-64.2072
472	-64.2092	-64.2092
473	-64.2072	-64.2072
474	-64.2092	-64.2092
475	-64.2072	-64.2072
476	-64.2092	-64.2092
477	-64.2072	-64.2072
478	-64.2092	-64.2092
479	-64.2072	-64.2072
480	-64.2092	-64.2092
481	-64.2072	-64.2072
482	-64.2092	-64.2092
483	-64.2072	-64.2072
484	-64.2092	-64.2092
485	-64.2072	-64.2072
486	-64.2092	-64.2092
487	-64.2072	-64.2072
488	-64.2092	-64.2092
489	-64.2072	-64.2072
490	-64.2092	-64.2092
491	-64.2072	-64.2072
492	-64.2092	-64.2092
493	-64.2072	-64.2072
494	-64.2092	-64.2092
495	-64.2072	-64.2072
496	-64.2092	-64.2092
497	-64.2072	-64.2072
498	-64.2092	-64.2092
499	-64.2072	-64.2072
500	-64.2092	-64.2092
501	-64.2072	-64.2072
502	-64.2092	-64.2092
503	-64.2072	-64.2072
504	-64.2092	-64.2092
505	-64.2072	-64.2072
506	-64.2092	-64.2092
507	-64.2072	-64.2072
508	-64.2091	-64.2091
509	-64.2072	-64.2072
510	-64.2091	-64.2091
511	-64.2072	-64.2072
512	-64.2091	-64.2091
513	-64.2073	-64.2073
514	-64.2091	-64.2091
515	-64.2073	-64.2073
516	-64.2091	-64.2091
517	-64.2073	-64.2073
518	-64.2091	-64.2091
519	-64.2073	-64.2073
520	-64.2091	-64.2091
521	-64.2073	-64.2073
522	-64.2091	-64.2091
523	-64.2073	-64.2073
524	-64.2091	-64.2091
525	-64.2073	-64.2073
526	-64.2091	-64.2091
527	-64.2073	-64.2073
528	-64.2091	-64.2091
529	-64.2073	-64.2073
530	-64.2091	-64.2091
531	-64.2073	-64.2073
532	-64.2091	-64.2091
533	-64.2073	-64.2073
534	-64.2091	-64.2091
535	-64.2073	-64.2073
536	-64.2091	-64.2091
537	-64.2073	-64.2073
538	-64.2091	-64.2091
539	-64.2073	-64.2073
540	-64.2091	-64.2091
541	-64.2073	-64.2073
542	-64.2091	-64.2091
543	-64.2073	-64.2073
544	-64.2091	-64.2091
545	-64.2073	-64.2073
546	-64.2091	-64.2091
547	-64.2073	-64.2073
548	-64.2091	-64.2091
549	-64.2073	-64.2073
550	-64.2091	-64.2091
551	-64.2073	-64.2073
552	-64.2091	-64.2091
553	-64.2073	-64.2073
554	-64.2091	-64.2091
555	-64.2073	-64.2073
556	-64.2091	-64.2091
557	-64.2073	-64.2073
558	-64.2091	-64.2091
559	-64.2073	-64.2073
560	-64.2091	-64.2091
561	-64.2073	-64.2073
562	-64.2091	-64.2091
563	-64.2073	-64.2073
564	-64.2091	-64.2091
565	-64.2073	-64.2073
566	-64.2091	-64.2091
567	-64.2073	-64.2073
568	-64.2091	-64.2091
569	-64.2073	-64.2073
570	-64.2091	-64.2091
571	-64.2073	-64.2073
572	-64.2091	-64.2091
573	-64.2073	-64.2073
574	-64.2091	-64.2091
575	-64.2073	-64.2073
576	-64.2091	-64.2091
577	-64.2073	-64.2073
578	-64.2091	-64.2091
579	-64.2073	-64.2073
580	-64.2091	-64.2091
581	-64.2073	-64.2073
582	-64.2091	-64.2091
583	-64.2073	-64.2073
584	-64.209	-64.209
585	-64.2073	-64.2073
586	-64.209	-64.209
587	-64.2073	-64.2073
588	-64.209	-64.209
589	-64.2074	-64.2074
590	-64.209	-64.209
591	-64.2074	-64.2074
592	-64.209	-64.209
593	-64.2074	-64.2074
594	-64.209	-64.209
595	-64.2074	-64.2074
596	-64.209	-64.209
597	-64.2074	-64.2074
598	-64.209	-64.209
599	-64.2074	-64.2074
600	-64.209	-64.209
601	-64.2074	-64.2074
602	-64.209	-64.209
603	-64.2074	-64.2074
604	-64.209	-64.209
605	-64.2074	-64.2074
606	-64.209	-64.209
607	-64.2074	-64.2074
608	-64.209	-64.209
609	-64.2074	-64.2074
610	-64.209	-64.209
611	-64.2074	-64.2074
612	-64.209	-64.209
613	-64.2074	-64.2074
614	-64.209	-64.209
615	-64.2074	-64.2074
616	-64.209	-64.209
617	-64.2074	-64.2074
618	-64.209	-64.209
619	-64.2074	-64.2074
620	-64.209	-64.209
621	-64.2074	-64.2074
622	-64.209	-64.209
623	-64.2074	-64.2074
624	-64.209	-64.209
625	-64.2074	-64.2074
626	-64.209	-64.209
627	-64.2074	-64.2074
628	-64.209	-64.209
629	-64.2074	-64.2074
630	-64.209	-64.209
631	-64.2074	-64.2074
632	-64.209	-64.209
633	-64.2074	-64.2074
634	-64.209	-64.209
635	-64.2074	-64.2074
636	-64.209	-64.209
637	-64.2074	-64.2074
638	-64.209	-64.209
639	-64.2074	-64.2074
640	-64.209	-64.209
641	-64.2074	-64.2074
642	-64.209	-64.209
643	-64.2074	-64.2074
644	-64.209	-64.209
645	-64.2074	-64.2074
646	-64.209	-64.209
647	-64.2074	-64.2074
648	-64.209	-64.209
649	-64.2074	-64.2074
650	-64.209	-64.209
651	-64.2074	-64.2074
652	-64.209	-64.209
653	-64.2074	-64.2074
654	-64.209	-64.209
655	-64.2074	-64.2074
656	-64.209	-64.209
657	-64.2074	-64.2074
658	-64.209	-64.209
659	-64.2074	-64.2074
660	-64.209	-64.209
661	-64.2074	-64.2074
662	-64.209	-64.209
663	-64.2074	-64.2074
664	-64.209	-64.209
665	-64.2074	-64.2074
666	-64.209	-64.209
667	-64.2074	-64.2074
668	-64.209	-64.209
669	-64.2074	-64.2074
670	-64.209	-64.209
671	-64.2074	-64.2074
672	-64.209	-64.209
673	-64.2074	-64.2074
674	-64.2089	-64.2089
675	-64.2074	-64.2074
676	-64.2089	-64.2089
677	-64.2074	-64.2074
678	-64.2089	-64.2089
679	-64.2075	-64.2075
680	-64.2089	-64.2089
681	-64.2075	-64.2075
682	-64.2089	-64.2089
683	-64.2075	-64.2075
684	-64.2089	-64.2089
685	-64.2075	-64.2075
686	-64.2089	-64.2089
687	-64.2075	-64.2075
688	-64.2089	-64.2089
689	-64.2075	-64.2075
690	-64.2089	-64.2089
691	-64.2075	-64.2075
692	-64.2089	-64.2089
693	-64.2075	-64.2075
694	-64.2089	-64.2089
695	-64.2075	-64.2075
696	-64.2089	-64.2089
697	-64.2075	-64.2075
698	-64.2089	-64.2089
699	-64.2075	-64.2075
700	-64.2089	-64.2089
701	-64.2075	-64.2075
702	-64.2089	-64.2089
703	-64.2075	-64.2075
704	-64.2089	-64.2089
705	-64.2075	-64.2075
706	-64.2089	-64.2089
707	-64.2075	-64.2075
708	-64.2089	-64.2089
709	-64.2075	-64.2075
710	-64.2089	-64.2089
711	-64.2075	-64.2075
712	-64.2089	-64.2089
713	-64.2075	-64.2075
714	-64.2089	-64.2089
715	-64.2075	-64.2075
716	-64.2089	-64.2089
717	-64.2075	-64.2075
718	-64.2089	-64.2089
719	-64.2075	-64.2075
720	-64.2089	-64.2089
721	-64.2075	-64.2075
722	-64.2089	-64.2089
723	-64.2075	-64.2075
724	-64.2089	-64.2089
725	-64.2075	-64.2075
726	-64.2089	-64.2089
727	-64.2075	-64.2075
728	-64.2089	-64.2089
729	-64.2075	-64.2075
730	-64.2089	-64.2089
731	-64.2075	-64.2075
732	-64.2089	-64.2089
733	-64.2075	-64.2075
734	-64.2089	-64.2089
735	-64.2075	-64.2075
736	-64.2089	-64.2089
737	-64.2075	-64.2075
738	-64.2089	-64.2089
739	-64.2075	-64.2075
740	-64.2089	-64.2089
741	-64.2075	-64.2075
742	-64.2089	-64.2089
743	-64.2075	-64.2075
744	-64.2089	-64.2089
745	-64.2075	-64.2075
746	-64.2089	-64.2089
747	-64.2075	-64.2075
748	-64.2089	-64.2089
749	-64.2075	-64.2075
750	-64.2089	-64.2089
751	-64.2075	-64.2075
752	-64.2089	-64.2089
753	-64.2075	-64.2075
754	-64.2089	-64.2089
755	-64.2075	-64.2075
756	-64.2089	-64.2089
757	-64.2075	-64.2075
758	-64.2089	-64.2089
759	-64.2075	-64.2075
760	-64.2089	-64.2089
761	-64.2075	-64.2075
762	-64.2089	-64.2089
763	-64.2075	-64.2075
764	-64.2089	-64.2089
765	-64.2075	-64.2075
766	-64.2089	-64.2089
767	-64.2075	-64.2075
768	-64.2089	-64.2089
769	-64.2075	-64.2075
770	-64.2089	-64.2089
771	-64.2075	-64.2075
772	-64.2089	-64.2089
773	-64.2075	-64.2075
774	-64.2089	-64.2089
775	-64.2075	-64.2075
776	-64.2089	-64.2089
777	-64.2075	-64.2075
778	-64.2089	-64.2089
779	-64.2075	-64.2075
780	-64.2089	-64.2089
781	-64.2075	-64.2075
782	-64.2089	-64.2089
783	-64.2075	-64.2075
784	-64.2088	-64.2088
785	-64.2075	-64.2075
786	-64.2088	-64.2088
787	-64.2075	-64.2075
788	-64.2088	-64.2088
789	-64.2076	-64.2076
790	-64.2088	-64.2088
791	-64.2076	-64.2076
792	-64.2088	-64.2088
793	-64.2076	-64.2076
794	-64.2088	-64.2088
795	-64.2076	-64.2076
796	-64.2088	-64.2088
797	-64.2076	-64.2076
798	-64.2088	-64.2088
799	-64.2076	-64.2076
800	-64.2088	-64.2088
801	-64.2076	-64.2076
802	-64.2088	-64.2088
803	-64.2076	-64.2076
804	-64.2088	-64.2088
805	-64.2076	-64.2076
806	-64.2088	-64.2088
807	-64.2076	-64.2076
808	-64.2088	-64.2088
809	-64.2076	-64.2076
810	-64.2088	-64.2088
811	-64.2076	-64.2076
812	-64.2088	-64.2088
813	-64.2076	-64.2076
814	-64.2088	-64.2088
815	-64.2076	-64.2076
816	-64.2088	-64.2088
817	-64.2076	-64.2076
818	-64.2088	-64.2088
819	-64.2076	-64.2076
820	-64.2088	-64.2088
821	-64.2076	-64.2076
822	-64.2088	-64.2088
823	-64.2076	-64.2076
824	-64.2088	-64.2088
825	-64.2076	-64.2076
826	-64.2088	-64.2088
827	-64.2076	-64.2076
828	-64.2088	-64.2088
829	-64.2076	-64.2076
830	-64.2088	-64.2088
831	-64.2076	-64.2076
832	-64.2088	-64.2088
833	-64.2076	-64.2076
834	-64.2088	-64.2088
835	-64.2076	-64.2076
836	-64.2088	-64.2088
837	-64.2076	-64.2076
838	-64.2088	-64.2088
839	-64.2076	-64.2076
840	-64.2088	-64.2088
841	-64.2076	-64.2076
842	-64.2088	-64.2088
843	-64.2076	-64.2076
844	-64.2088	-64.2088
845	-64.2076	-64.2076
846	-64.2088	-64.2088
847	-64.2076	-64.2076
848	-64.2088	-64.2088
849	-64.2076	-64.2076
850	-64.2088	-64.2088
851	-64.2076	-64.2076
852	-64.2088	-64.2088
853	-64.2076	-64.2076
854	-64.2088	-64.2088
855	-64.2076	-64.2076
856	-64.2088	-64.2088
857	-64.2076	-64.2076
858	-64.2088	-64.2088
859	-64.2076	-64.2076
860	-64.2088	-64.2088
861	-64.2076	-64.2076
862	-64.2088	-64.2088
863	-64.2076	-64.2076
864	-64.2088	-64.2088
865	-64.2076	-64.2076
866	-64.2088	-64.2088
867	-64.2076	-64.2076
868	-64.2088	-64.2088
869	-64.2076	-64.2076
870	-64.2088	-64.2088
871	-64.2076	-64.2076
872	-64.2088	-64.2088
873	-64.2076	-64.2076
874	-64.2088	-64.2088
875	-64.2076	-64.2076
876	-64.2088	-64.2088
877	-64.2076	-64.2076
878	-64.2088	-64.2088
879	-64.2076	-64.2076
880	-64.2088	-64.2088
881	-64.2076	-64.2076
882	-64.2088	-64.2088
883	-64.2076	-64.2076
884	-64.2088	-64.2088
885	-64.2076	-64.2076
886	-64.2088	-64.2088
887	-64.2076	-64.2076
888	-64.2088	-64.2088
889	-64.2076	-64.2076
890	-64.2088	-64.2088
891	-64.2076	-64.2076
892	-64.2088	-64.2088
893	-64.2076	-64.2076
894	-64.2088	-64.2088
895	-64.2076	-64.2076
896	-64.2088	-64.2088
897	-64.2076	-64.2076
898	-64.2088	-64.2088
899	-64.2076	-64.2076
900	-64.2088	-64.2088
901	-64.2076	-64.2076
902	-64.2088	-64.2088
903	-64.2076	-64.2076
904	-64.2088	-64.2088
905	-64.2076	-64.2076
906	-64.2088	-64.2088
907	-64.2076	-64.2076
908	-64.2088	-64.2088
909	-64.2076	-64.2076
910	-64.2088	-64.2088
911	-64.2076	-64.2076
912	-64.2088	-64.2088
913	-64.2076	-64.2076
914	-64.2088	-64.2088
915	-64.2076	-64.2076
916	-64.2088	-64.2088
917	-64.2076	-64.2076
918	-64.2087	-64.2087
919	-64.2076	-64.2076
920	-64.2087	-64.2087
921	-64.2076	-64.2076
922	-64.2087	-64.2087
923	-64.2076	-64.2076
924	-64.2087	-64.2087
925	-64.2077	-64.2077
926	-64.2087	-64.2087
927	-64.2077	-64.2077
928	-64.2087	-64.2087
929	-64.2077	-64.2077
930	-64.2087	-64.2087
931	-64.2077	-64.2077
932	-64.2087	-64.2087
933	-64.2077	-64.2077
934	-64.2087	-64.2087
935	-64.2077	-64.2077
936	-64.2087	-64.2087
937	-64.2077	-64.2077
938	-64.2087	-64.2087
939	-64.2077	-64.2077
940	-64.2087	-64.2087
941	-64.2077	-64.2077
942	-64.2087	-64.2087
943	-64.2077	-64.2077
944	-64.2087	-64.2087
945	-64.2077	-64.2077
946	-64.2087	-64.2087
947	-64.2077	-64.2077
948	-64.2087	-64.2087
949	-64.2077	-64.2077
950	-64.2087	-64.2087
951	-64.2077	-64.2077
952	-64.2087	-64.2087
953	-64.2077	-64.2077
954	-64.2087	-64.2087
955	-64.2077	-64.2077
956	-64.2087	-64.2087
957	-64.2077	-64.2077
958	-64.2087	-64.2087
959	-64.2077	-64.2077
960	-64.2087	-64.2087
961	-64.2077	-64.2077
962	-64.2087	-64.2087
963	-64.2077	-64.2077
964	-64.2087	-64.2087
965	-64.2077	-64.2077
966	-64.2087	-64.2087
967	-64.2077	-64.2077
968	-64.2087	-64.2087
969	-64.2077	-64.2077
970	-64.2087	-64.2087
971	-64.2077	-64.2077
972	-64.2087	-64.2087
973	-64.2077	-64.2077
974	-64.2087	-64.2087
975	-64.2077	-64.2077
976	-64.2087	-64.2087
977	-64.2077	-64.2077
978	-64.2087	-64.2087
979	-64.2077	-64.2077
980	-64.2087	-64.2087
981	-64.2077	-64.2077
982	-64.2087	-64.2087
983	-64.2077	-64.2077
984	-64.2087	-64.2087
985	-64.2077	-64.2077
986	-64.2087	-64.2087
987	-64.2077	-64.2077
988	-64.2087	-64.2087
989	-64.2077	-64.2077
990	-64.2087	-64.2087
991	-64.2077	-64.2077
992	-64.2087	-64.2087
993	-64.2077	-64.2077
994	-64.2087	-64.2087
995	-64.2077	-64.2077
996	-64.2087	-64.2087
997	-64.2077	-64.2077
998	-64.2087	-64.2087
999	-64.2077	-64.2077
1000	-64.2087	-64.2087
1001	-64.2077	-64.2077
1002	-64.2087	-64.2087
1003	-63.8487	-63.8295
1004	-63.442	-63.3652
1005	-63.1359	-63.0187
1006	-62.9072	-62.7565
1007	-62.7669	-62.5951
1008	-62.6722	-62.485
1009	-62.6329	-62.4369
1010	-62.6173	-62.4167
1011	-62.6354	-62.4338
1012	-62.6647	-62.4652
1013	-62.7142	-62.5183
1014	-62.7679	-62.578
1015	-62.833	-62.6496
1016	-62.8985	-62.7231
1017	-62.9697	-62.8023
1018	-63.0391	-62.8808
1019	-63.1107	-62.961
1020	-63.1794	-63.0392
1021	-63.248	-63.1165
1022	-63.3133	-63.1911
1023	-63.3771	-63.2632
1024	-63.4376	-63.3325
1025	-63.4956	-63.3985
1026	-63.5506	-63.4616
1027	-63.6026	-63.5209
1028	-63.6518	-63.5776
1029	-63.6979	-63.6303
1030	-63.7415	-63.6807
1031	-63.7819	-63.727
1032	-63.8202	-63.7713
1033	-63.8553	-63.8117
1034	-63.8888	-63.8504
1035	-63.9191	-63.8852
1036	-63.948	-63.9188
1037	-63.9739	-63.9487
1038	-63.9989	-63.9776
1039	-64.0209	-64.003
1040	-64.0423	-64.0277
1041	-64.0609	-64.0492
1042	-64.0791	-64.0703
1043	-64.0947	-64.0883
1044	-64.1102	-64.1061
1045	-64.1232	-64.1211
1046	-64.1362	-64.136
1047	-64.1469	-64.1483
1048	-64.1578	-64.1609
1049	-64.1666	-64.1709
1050	-64.1757	-64.1813
1051	-64.1828	-64.1893
1052	-64.1904	-64.1979
1053	-64.196	-64.2042
1054	-64.2023	-64.2113
1055	-64.2066	-64.2162
1056	-64.2118	-64.2219
1057	-64.2151	-64.2256
1058	-64.2194	-64.2302
1059	-64.2218	-64.2329
1060	-64.2253	-64.2366
1061	-64.227	-64.2384
1062	-64.2298	-64.2413
1063	-64.2309	-64.2424
1064	-64.2331	-64.2447
1065	-64.2337	-64.2452
1066	-64.2355	-64.2469
1067	-64.2357	-64.2469
1068	-64.2371	-64.2483
1069	-64.2369	-64.2479
1070	-64.238	-64.2489
1071	-64.2376	-64.2482
1072	-64.2384	-64.2489
1073	-64.2377	-64.2479
1074	-64.2384	-64.2484
1075	-64.2376	-64.2473
1076	-64.2381	-64.2476
1077	-64.2371	-64.2463
1078	-64.2375	-64.2465
1079	-64.2364	-64.2451
1080	-64.2367	-64.2452
1081	-64.2355	-64.2437
1082	-64.2357	-64.2437
1083	-64.2345	-64.2421
1084	-64.2347	-64.2422
1085	-64.2334	-64.2405
1086	-64.2336	-64.2405
1087	-64.2322	-64.2389
1088	-64.2324	-64.2389
1089	-64.231	-64.2372
1090	-64.2312	-64.2372
1091	-64.2298	-64.2356
1092	-64.23	-64.2356
1093	-64.2286	-64.234
1094	-64.2288	-64.234
1095	-64.2274	-64.2324
1096	-64.2276	-64.2324
1097	-64.2263	-64.2308
1098	-64.2265	-64.2309
1099	-64.2252	-64.2294
1100	-64.2254	-64.2295
1101	-64.2241	-64.2279
1102	-64.2243	-64.2281
1103	-64.223	-64.2266
1104	-64.2233	-64.2268
1105	-64.222	-64.2253
1106	-64.2224	-64.2255
1107	-64.2211	-64.2241
1108	-64.2214	-64.2243
1109	-64.2202	-64.2229
1110	-64.2206	-64.2232
1111	-64.2194	-64.2219
1112	-64.2197	-64.2222
1113	-64.2186	-64.2208
1114	-64.219	-64.2212
1115	-64.2178	-64.2199
1116	-64.2182	-64.2203
1117	-64.2171	-64.219
1118	-64.2176	-64.2194
1119	-64.2164	-64.2182
1120	-64.2169	-64.2186
1121	-64.2158	-64.2174
1122	-64.2163	-64.2179
1123	-64.2152	-64.2167
1124	-64.2158	-64.2172
1125	-64.2147	-64.216
1126	-64.2152	-64.2165
1127	-64.2142	-64.2154
1128	-64.2147	-64.2159
1129	-64.2137	-64.2148
1130	-64.2143	-64.2153
1131	-64.2133	-64.2143
1132	-64.2139	-64.2148
1133	-64.2129	-64.2138
1134	-64.2135	-64.2143
1135	-64.2125	-64.2133
1136	-64.2131	-64.2139
1137	-64.2121	-64.2129
1138	-64.2128	-64.2135
1139	-64.2118	-64.2125
1140	-64.2125	-64.2131
1141	-64.2115	-64.2121
1142	-64.2122	-64.2128
1143	-64.2112	-64.2118
1144	-64.2119	-64.2124
1145	-64.211	-64.2115
1146	-64.2116	-64.2121
1147	-64.2107	-64.2112
1148	-64.2114	-64.2118
1149	-64.2105	-64.2109
1150	-64.2112	-64.2116
1151	-64.2103	-64.2107
1152	-64.211	-64.2114
1153	-64.2101	-64.2104
1154	-64.2108	-64.2111
1155	-64.2099	-64.2102
1156	-64.2106	-64.2109
1157	-64.2098	-64.21
1158	-64.2105	-64.2107
1159	-64.2096	-64.2099
1160	-64.2103	-64.2106
1161	-64.2095	-64.2097
1162	-64.2102	-64.2104
1163	-64.2094	-64.2095
1164	-64.2101	-64.2103
1165	-64.2092	-64.2094
1166	-64.21	-64.2101
1167	-64.2091	-64.2093
1168	-64.2099	-64.21
1169	-64.209	-64.2092
1170	-64.2098	-64.2099
1171	-64.2089	-64.2091
1172	-64.2097	-64.2098
1173	-64.2088	-64.209
1174	-64.2096	-64.2097
1175	-64.2088	-64.2089
1176	-64.2095	-64.2096
1177	-64.2087	-64.2088
1178	-64.2094	-64.2095
1179	-64.2086	-64.2087
1180	-64.2094	-64.2095
1181	-64.2086	-64.2086
1182	-64.2093	-64.2094
1183	-64.2085	-64.2086
1184	-64.2093	-64.2093
1185	-64.2084	-64.2085
1186	-64.2092	-64.2093
1187	-64.2084	-64.2084
1188	-64.2092	-64.2092
1189	-64.2084	-64.2084
1190	-64.2091	-64.2092
1191	-64.2083	-64.2084
1192	-64.2091	-64.2091
1193	-64.2083	-64.2083
1194	-64.209	-64.2091
1195	-64.2082	-64.2083
1196	-64.209	-64.209
1197	-64.2082	-64.2082
1198	-64.209	-64.209
1199	-64.2082	-64.2082
1200	-64.2089	-64.209
1201	-64.2082	-64.2082
1202	-64.2089	-64.2089
1203	-64.2081	-64.2081
1204	-64.2089	-64.2089
1205	-64.2081	-64.2081
1206	-64.2089	-64.2089
1207	-64.2081	-64.2081
1208	-64.2088	-64.2089
1209	-64.2081	-64.2081
1210	-64.2088	-64.2088
1211	-64.208	-64.2081
1212	-64.2088	-64.2088
1213	-64.208	-64.208
1214	-64.2088	-64.2088
1215	-64.208	-64.208
1216	-64.2088	-64.2088
1217	-64.208	-64.208
1218	-64.2087	-64.2088
1219	-64.208	-64.208
1220	-64.2087	-64.2087
1221	-64.208	-64.208
1222	-64.2087	-64.2087
1223	-64.208	-64.208
1224	-64.2087	-64.2087
1225	-64.208	-64.208
1226	-64.2087	-64.2087
1227	-64.2079	-64.2079
1228	-64.2087	-64.2087
1229	-64.2079	-64.2079
1230	-64.2087	-64.2087
1231	-64.2079	-64.2079
1232	-64.2087	-64.2087
1233	-64.2079	-64.2079
1234	-64.2087	-64.2087
1235	-64.2079	-64.2079
1236	-64.2086	-64.2087
1237	-64.2079	-64.2079
1238	-64.2086	-64.2086
1239	-64.2079	-64.2079
1240	-64.2086	-64.2086
1241	-64.2079	-64.2079
1242	-64.2086	-64.2086
1243	-64.2079	-64.2079
1244	-64.2086	-64.2086
1245	-64.2079	-64.2079
1246	-64.2086	-64.2086
1247	-64.2079	-64.2079
1248	-64.2086	-64.2086
1249	-64.2079	-64.2079
1250	-64.2086	-64.2086
1251	-64.2079	-64.2079
1252	-64.2086	-64.2086
1253	-64.2079	-64.2079
1254	-64.2086	-64.2086
1255	-64.2079	-64.2079
1256	-64.2086	-64.2086
1257	-64.2079	-64.2079
1258	-64.2086	-64.2086
1259	-64.2079	-64.2079
1260	-64.2086	-64.2086
1261	-64.2079	-64.2079
1262	-64.2086	-64.2086
1263	-64.2079	-64.2079
1264	-64.2086	-64.2086
1265	-64.2079	-64.2079
1266	-64.2086	-64.2086
1267	-64.2079	-64.2079
1268	-64.2086	-64.2086
1269	-64.2079	-64.2079
1270	-64.2086	-64.2086
1271	-64.2079	-64.2079
1272	-64.2086	-64.2086
1273	-64.2079	-64.2079
1274	-64.2086	-64.2086
1275	-64.2079	-64.2079
1276	-64.2086	-64.2086
1277	-64.2079	-64.2079
1278	-64.2086	-64.2086
1279	-64.2079	-64.2079
1280	-64.2086	-64.2086
1281	-64.2079	-64.2079
1282	-64.2086	-64.2086
1283	-64.2079	-64.2079
1284	-64.2086	-64.2086
1285	-64.2079	-64.2079
1286	-64.2086	-64.2086
1287	-64.2079	-64.2079
1288	-64.2086	-64.2086
1289	-64.2079	-64.2079
1290	-64.2086	-64.2086
1291	-64.2079	-64.2079
1292	-64.2086	-64.2086
1293	-64.2079	-64.2079
1294	-64.2086	-64.2086
1295	-64.2079	-64.2079
1296	-64.2086	-64.2086
1297	-64.2079	-64.2079
1298	-64.2085	-64.2086
1299	-64.2079	-64.2079
1300	-64.2085	-64.2086
1301	-64.2079	-64.2079
1302	-64.2085	-64.2086
1303	-64.2079	-64.2079
1304	-64.2085	-64.2085
1305	-64.2079	-64.2079
1306	-64.2085	-64.2085
1307	-64.2079	-64.2079
1308	-64.2085	-64.2085
1309	-64.2079	-64.2079
1310	-64.2085	-64.2085
1311	-64.2079	-64.2079
1312	-64.2085	-64.2085
1313	-64.2079	-64.2079
1314	-64.2085	-64.2085
1315	-64.2079	-64.2079
1316	-64.2085	-64.2085
1317	-64.2079	-64.2079
1318	-64.2085	-64.2085
1319	-64.2079	-64.2079
1320	-64.2085	-64.2085
1321	-64.2079	-64.2079
1322	-64.2085	-64.2085
1323	-64.2079	-64.2079
1324	-64.2085	-64.2085
1325	-64.2079	-64.2079
1326	-64.2085	-64.2085
1327	-64.2079	-64.2079
1328	-64.2085	-64.2085
1329	-64.2079	-64.2079
1330	-64.2085	-64.2085
1331	-64.2079	-64.2079
1332	-64.2085	-64.2085
1333	-64.2079	-64.2079
1334	-64.2085	-64.2085
1335	-64.2079	-64.2079
1336	-64.2085	-64.2085
1337	-64.2079	-64.2079
1338	-64.2085	-64.2085
1339	-64.2079	-64.2079
1340	-64.2085	-64.2085
1341	-64.2079	-64.2079
1342	-64.2085	-64.2085
1343	-64.2079	-64.2079
1344	-64.2085	-64.2085
1345	-64.2079	-64.2079
1346	-64.2085	-64.2085
1347	-64.2079	-64.2079
1348	-64.2085	-64.2085
1349	-64.2079	-64.2079
1350	-64.2085	-64.2085
1351	-64.2079	-64.2079
1352	-64.2085	-64.2085
1353	-64.2079	-64.2079
1354	-64.2085	-64.2085
1355	-64.2079	-64.2079
1356	-64.2085	-64.2085
1357	-64.2079	-64.2079
1358	-64.2085	-64.2085
1359	-64.2079	-64.2079
1360	-64.2085	-64.2085
1361	-64.2079	-64.2079
1362	-64.2085	-64.2085
1363	-64.2079	-64.2079
1364	-64.2085	-64.2085
1365	-64.2079	-64.2079
1366	-64.2085	-64.2085
1367	-64.2079	-64.2079
1368	-64.2085	-64.2085
1369	-64.2079	-64.2079
1370	-64.2085	-64.2085
1371	-64.2079	-64.2079
1372	-64.2085	-64.2085
1373	-64.2079	-64.2079
1374	-64.2085	-64.2085
1375	-64.2079	-64.2079
1376	-64.2085	-64.2085
1377	-64.2079	-64.2079
1378	-64.2085	-64.2085
1379	-64.2079	-64.2079
1380	-64.2085	-64.2085
1381	-64.2079	-64.2079
1382	-64.2085	-64.2085
1383	-64.2079	-64.2079
1384	-64.2085	-64.2085
1385	-64.2079	-64.2079
1386	-64.2085	-64.2085
1387	-64.2079	-64.2079
1388	-64.2085	-64.2085
1389	-64.2079	-64.2079
1390	-64.2085	-64.2085
1391	-64.2079	-64.2079
1392	-64.2085	-64.2085
1393	-64.2079	-64.2079
1394	-64.2085	-64.2085
1395	-64.2079	-64.2079
1396	-64.2085	-64.2085
1397	-64.2079	-64.2079
1398	-64.2085	-64.2085
1399	-64.2079	-64.2079
1400	-64.2085	-64.2085
1401	-64.2079	-64.2079
1402	-64.2085	-64.2085
1403	-64.2079	-64.2079
1404	-64.2085	-64.2085
1405	-64.2079	-64.2079
1406	-64.2085	-64.2085
1407	-64.2079	-64.2079
1408	-64.2085	-64.2085
1409	-64.2079	-64.2079
1410	-64.2085	-64.2085
1411	-64.2079	-64.2079
1412	-64.2085	-64.2085
1413	-64.2079	-64.2079
1414	-64.2085	-64.2085
1415	-64.2079	-64.2079
1416	-64.2085	-64.2085
1417	-64.2079	-64.2079
1418	-64.2085	-64.2085
1419	-64.2079	-64.2079
1420	-64.2085	-64.2085
1421	-64.2079	-64.2079
1422	-64.2085	-64.2085
1423	-64.2079	-64.2079
1424	-64.2085	-64.2085
1425	-64.2079	-64.2079
1426	-64.2085	-64.2085
1427	-64.2079	-64.2079
1428	-64.2085	-64.2085
1429	-64.2079	-64.2079
1430	-64.2085	-64.2085
1431	-64.2079	-64.2079
1432	-64.2085	-64.2085
1433	-64.2079	-64.2079
1434	-64.2085	-64.2085
1435	-64.2079	-64.2079
1436	-64.2085	-64.2085
1437	-64.2079	-64.2079
1438	-64.2085	-64.2085
1439	-64.2079	-64.2079
1440	-64.2085	-64.2085
1441	-64.2079	-64.2079
1442	-64.2085	-64.2085
1443	-64.2079	-64.2079
1444	-64.2085	-64.2085
1445	-64.2079	-64.2079
1446	-64.2085	-64.2085
1447	-64.2079	-64.2079
1448	-64.2085	-64.2085
1449	-64.2079	-64.2079
1450	-64.2085	-64.2085
1451	-64.2079	-64.2079
1452	-64.2085	-64.2085
1453	-64.2079	-64.2079
1454	-64.2085	-64.2085
1455	-64.2079	-64.2079
1456	-64.2085	-64.2085
1457	-64.2079	-64.2079
1458	-64.2085	-64.2085
1459	-64.2079	-64.2079
1460	-64.2085	-64.2085
1461	-64.2079	-64.2079
1462	-64.2085	-64.2085
1463	-64.2079	-64.2079
1464	-64.2085	-64.2085
1465	-64.2079	-64.2079
1466	-64.2085	-64.2085
1467	-64.2079	-64.2079
1468	-64.2085	-64.2085
1469	-64.2079	-64.2079
1470	-64.2085	-64.2085
1471	-64.2079	-64.2079
1472	-64.2085	-64.2085
1473	-64.2079	-64.2079
1474	-64.2085	-64.2085
1475	-64.2079	-64.2079
1476	-64.2085	-64.2085
1477	-64.2079	-64.2079
1478	-64.2085	-64.2085
1479	-64.2079	-64.2079
1480	-64.2085	-64.2085
1481	-64.2079	-64.2079
1482	-64.2085	-64.2085
1483	-64.2079	-64.2079
1484	-64.2085	-64.2085
1485	-64.2079	-64.2079
1486	-64.2085	-64.2085
1487	-64.2079	-64.2079
1488	-64.2085	-64.2085
1489	-64.2079	-64.2079
1490	-64.2085	-64.2085
1491	-64.2079	-64.2079
1492	-64.2085	-64.2085
1493	-64.2079	-64.2079
1494	-64.2085	-64.2085
1495	-64.2079	-64.2079
1496	-64.2085	-64.2085
1497	-64.2079	-64.2079
1498	-64.2085	-64.2085
1499	-64.2079	-64.2079
1500	-64.2085	-64.2085
1501	-64.2079	-64.2079
1502	-64.2085	-64.2085
1503	-64.2079	-64.2079
1504	-64.2085	-64.2085
1505	-64.2079	-64.2079
1506	-64.2085	-64.2085
1507	-64.2079	-64.2079
1508	-64.2085	-64.2085
1509	-64.2079	-64.2079
1510	-64.2085	-64.2085
1511	-64.2079	-64.2079
1512	-64.2085	-64.2085
1513	-64.2079	-64.2079
1514	-64.2085	-64.2085
1515	-64.2079	-64.2079
1516	-64.2085	-64.2085
1517	-64.2079	-64.2079
1518	-64.2085	-64.2085
1519	-64.2079	-64.2079
1520	-64.2085	-64.2085
1521	-64.2079	-64.2079
1522	-64.2085	-64.2085
1523	-64.2079	-64.2079
1524	-64.2085	-64.2085
1525	-64.2079	-64.2079
1526	-64.2085	-64.2085
1527	-64.2079	-64.2079
1528	-64.2085	-64.2085
1529	-64.2079	-64.2079
1530	-64.2085	-64.2085
1531	-64.2079	-64.2079
1532	-64.2085	-64.2085
1533	-64.2079	-64.2079
1534	-64.2085	-64.2085
1535	-64.2079	-64.2079
1536	-64.2085	-64.2085
1537	-64.2079	-64.2079
1538	-64.2085	-64.2085
1539	-64.2079	-64.2079
1540	-64.2085	-64.2085
1541	-64.2079	-64.2079
1542	-64.2085	-64.2085
1543	-64.2079	-64.2079
1544	-64.2085	-64.2085
1545	-64.2079	-64.2079
1546	-64.2085	-64.2085
1547	-64.2079	-64.2079
1548	-64.2085	-64.2085
1549	-64.2079	-64.2079
1550	-64.2085	-64.2085
1551	-64.2079	-64.2079
1552	-64.2085	-64.2085
1553	-64.2079	-64.2079
1554	-64.2085	-64.2085
1555	-64.2079	-64.2079
1556	-64.2085	-64.2085
1557	-64.2079	-64.2079
1558	-64.2085	-64.2085
1559	-64.2079	-64.2079
1560	-64.2085	-64.2085
1561	-64.2079	-64.2079
1562	-64.2085	-64.2085
1563	-64.2079	-64.2079
1564	-64.2085	-64.2085
1565	-64.2079	-64.2079
1566	-64.2085	-64.2085
1567	-64.2079	-64.2079
1568	-64.2085	-64.2085
1569	-64.2079	-64.2079
1570	-64.2085	-64.2085
1571	-64.2079	-64.2079
1572	-64.2085	-64.2085
1573	-64.2079	-64.2079
1574	-64.2085	-64.2085
1575	-64.2079	-64.2079
1576	-64.2085	-64.2085
1577	-64.2079	-64.2079
1578	-64.2085	-64.2085
1579	-64.2079	-64.2079
1580	-64.2085	-64.2085
1581	-64.2079	-64.2079
1582	-64.2085	-64.2085
1583	-64.2079	-64.2079
1584	-64.2084	-64.2085
1585	-64.2079	-64.2079
1586	-64.2084	-64.2085
1587	-64.2079	-64.2079
1588	-64.2084	-64.2085
1589	-64.2079	-64.2079
1590	-64.2084	-64.2084
1591	-64.2079	-64.2079
1592	-64.2084	-64.2084
1593	-64.208	-64.2079
1594	-64.2084	-64.2084
1595	-64.208	-64.2079
1596	-64.2084	-64.2084
1597	-64.208	-64.2079
1598	-64.2084	-64.2084
1599	-64.208	-64.2079
1600	-64.2084	-64.2084
1601	-64.208	-64.208
1602	-64.2084	-64.2084
1603	-64.208	-64.208
1604	-64.2084	-64.2084
1605	-64.208	-64.208
1606	-64.2084	-64.2084
1607	-64.208	-64.208
1608	-64.2084	-64.2084
1609	-64.208	-64.208
1610	-64.2084	-64.2084
1611	-64.208	-64.208
1612	-64.2084	-64.2084
1613	-64.208	-64.208
1614	-64.2084	-64.2084
1615	-64.208	-64.208
1616	-64.2084	-64.2084
1617	-64.208	-64.208
1618	-64.2084	-64.2084
1619	-64.208	-64.208
1620	-64.2084	-64.2084
1621	-64.208	-64.208
1622	-64.2084	-64.2084
1623	-64.208	-64.208
1624	-64.2084	-64.2084
1625	-64.208	-64.208
1626	-64.2084	-64.2084
1627	-64.208	-64.208
1628	-64.2084	-64.2084
1629	-64.208	-64.208
1630	-64.2084	-64.2084
1631	-64.208	-64.208
1632	-64.2084	-64.2084
1633	-64.208	-64.208
1634	-64.2084	-64.2084
1635	-64.208	-64.208
1636	-64.2084	-64.2084
1637	-64.208	-64.208
1638	-64.2084	-64.2084
1639	-64.208	-64.208
1640	-64.2084	-64.2084
1641	-64.208	-64.208
1642	-64.2084	-64.2084
1643	-64.208	-64.208
1644	-64.2084	-64.2084
1645	-64.208	-64.208
1646	-64.2084	-64.2084
1647	-64.208	-64.208
1648	-64.2084	-64.2084
1649	-64.208	-64.208
1650	-64.2084	-64.2084
1651	-64.208	-64.208
1652	-64.2084	-64.2084
1653	-64.208	-64.208
1654	-64.2084	-64.2084
1655	-64.208	-64.208
1656	-64.2084	-64.2084
1657	-64.208	-64.208
1658	-64.2084	-64.2084
1659	-64.208	-64.208
1660	-64.2084	-64.2084
1661	-64.208	-64.208
1662	-64.2084	-64.2084
1663	-64.208	-64.208
1664	-64.2084	-64.2084
1665	-64.208	-64.208
1666	-64.2084	-64.2084
1667	-64.208	-64.208
1668	-64.2084	-64.2084
1669	-64.208	-64.208
1670	-64.2084	-64.2084
1671	-64.208	-64.208
1672	-64.2084	-64.2084
1673	-64.208	-64.208
1674	-64.2084	-64.2084
1675	-64.208	-64.208
1676	-64.2084	-64.2084
1677	-64.208	-64.208
1678	-64.2084	-64.2084
1679	-64.208	-64.208
1680	-64.2084	-64.2084
1681	-64.208	-64.208
1682	-64.2084	-64.2084
1683	-64.208	-64.208
1684	-64.2084	-64.2084
1685	-64.208	-64.208
1686	-64.2084	-64.2084
1687	-64.208	-64.208
1688	-64.2084	-64.2084
1689	-64.208	-64.208
1690	-64.2084	-64.2084
1691	-64.208	-64.208
1692	-64.2084	-64.2084
1693	-64.208	-64.208
1694	-64.2084	-64.2084
1695	-64.208	-64.208
1696	-64.2084	-64.2084
1697	-64.208	-64.208
1698	-64.2084	-64.2084
[truncated: 9,004 more rows]

## Sheet: Supplement 1E
Simulations				Experiment
X_Time, ms	Y_Uniform	Y_Slope trend		X_Time, ms	Y_mV
-299	-63.7	-63.7		86.9231	-62.5071
-298	-65.2193	-65.2193		163.846	-61.254
-297	-63.1998	-63.1998		240.769	-60.9901
-296	-64.1187	-64.1187		317.692	-61.144
-295	-62.7605	-62.7605		394.615	-61.3859
-294	-63.5368	-63.5368		471.538	-61.5178
-293	-62.5494	-62.5494		548.462	-61.6717
-292	-63.2308	-63.2308		625.385	-61.8036
-291	-62.4886	-62.4886		702.308	-61.8915
-290	-63.0986	-63.0986		779.231	-61.9795
-289	-62.5254	-62.5254
-288	-63.0755	-63.0755
-287	-62.6209	-62.6209
-286	-63.118	-63.118
-285	-62.7481	-62.7481
-284	-63.1976	-63.1976
-283	-62.8889	-62.8889
-282	-63.2956	-63.2956
-281	-63.0319	-63.0319
-280	-63.4001	-63.4001
-279	-63.1701	-63.1701
-278	-63.5039	-63.5039
-277	-63.2994	-63.2994
-276	-63.6024	-63.6024
-275	-63.4178	-63.4178
-274	-63.6935	-63.6935
-273	-63.5246	-63.5246
-272	-63.7758	-63.7758
-271	-63.6197	-63.6197
-270	-63.8492	-63.8492
-269	-63.7036	-63.7036
-268	-63.9139	-63.9139
-267	-63.7771	-63.7771
-266	-63.9702	-63.9702
-265	-63.841	-63.841
-264	-64.0189	-64.0189
-263	-63.8964	-63.8964
-262	-64.0606	-64.0606
-261	-63.9441	-63.9441
-260	-64.0961	-64.0961
-259	-63.985	-63.985
-258	-64.1262	-64.1262
-257	-64.0199	-64.0199
-256	-64.1514	-64.1514
-255	-64.0497	-64.0497
-254	-64.1724	-64.1724
-253	-64.0749	-64.0749
-252	-64.1897	-64.1897
-251	-64.0962	-64.0962
-250	-64.204	-64.204
-249	-64.1142	-64.1142
-248	-64.2155	-64.2155
-247	-64.1293	-64.1293
-246	-64.2248	-64.2248
-245	-64.1419	-64.1419
-244	-64.2321	-64.2321
-243	-64.1524	-64.1524
-242	-64.2378	-64.2378
-241	-64.1612	-64.1612
-240	-64.2422	-64.2422
-239	-64.1684	-64.1684
-238	-64.2454	-64.2454
-237	-64.1744	-64.1744
-236	-64.2477	-64.2477
-235	-64.1793	-64.1793
-234	-64.2492	-64.2492
-233	-64.1833	-64.1833
-232	-64.2501	-64.2501
-231	-64.1866	-64.1866
-230	-64.2504	-64.2504
-229	-64.1892	-64.1892
-228	-64.2504	-64.2504
-227	-64.1913	-64.1913
-226	-64.25	-64.25
-225	-64.193	-64.193
-224	-64.2494	-64.2494
-223	-64.1943	-64.1943
-222	-64.2485	-64.2485
-221	-64.1954	-64.1954
-220	-64.2475	-64.2475
-219	-64.1962	-64.1962
-218	-64.2464	-64.2464
-217	-64.1968	-64.1968
-216	-64.2453	-64.2453
-215	-64.1973	-64.1973
-214	-64.2441	-64.2441
-213	-64.1976	-64.1976
-212	-64.2428	-64.2428
-211	-64.1979	-64.1979
-210	-64.2416	-64.2416
-209	-64.1981	-64.1981
-208	-64.2403	-64.2403
-207	-64.1982	-64.1982
-206	-64.2391	-64.2391
-205	-64.1983	-64.1983
-204	-64.2379	-64.2379
-203	-64.1983	-64.1983
-202	-64.2368	-64.2368
-201	-64.1983	-64.1983
-200	-64.2356	-64.2356
-199	-64.1983	-64.1983
-198	-64.2345	-64.2345
-197	-64.1983	-64.1983
-196	-64.2335	-64.2335
-195	-64.1983	-64.1983
-194	-64.2325	-64.2325
-193	-64.1983	-64.1983
-192	-64.2315	-64.2315
-191	-64.1983	-64.1983
-190	-64.2306	-64.2306
-189	-64.1983	-64.1983
-188	-64.2297	-64.2297
-187	-64.1983	-64.1983
-186	-64.2289	-64.2289
-185	-64.1983	-64.1983
-184	-64.2281	-64.2281
-183	-64.1984	-64.1984
-182	-64.2274	-64.2274
-181	-64.1984	-64.1984
-180	-64.2267	-64.2267
-179	-64.1984	-64.1984
-178	-64.226	-64.226
-177	-64.1985	-64.1985
-176	-64.2253	-64.2253
-175	-64.1985	-64.1985
-174	-64.2247	-64.2247
-173	-64.1986	-64.1986
-172	-64.2242	-64.2242
-171	-64.1986	-64.1986
-170	-64.2236	-64.2236
-169	-64.1987	-64.1987
-168	-64.2231	-64.2231
-167	-64.1988	-64.1988
-166	-64.2226	-64.2226
-165	-64.1988	-64.1988
-164	-64.2222	-64.2222
-163	-64.1989	-64.1989
-162	-64.2217	-64.2217
-161	-64.199	-64.199
-160	-64.2213	-64.2213
-159	-64.1991	-64.1991
-158	-64.2209	-64.2209
-157	-64.1992	-64.1992
-156	-64.2205	-64.2205
-155	-64.1993	-64.1993
-154	-64.2202	-64.2202
-153	-64.1994	-64.1994
-152	-64.2198	-64.2198
-151	-64.1995	-64.1995
-150	-64.2195	-64.2195
-149	-64.1996	-64.1996
-148	-64.2192	-64.2192
-147	-64.1997	-64.1997
-146	-64.2189	-64.2189
-145	-64.1998	-64.1998
-144	-64.2186	-64.2186
-143	-64.1999	-64.1999
-142	-64.2183	-64.2183
-141	-64.2	-64.2
-140	-64.2181	-64.2181
-139	-64.2001	-64.2001
-138	-64.2178	-64.2178
-137	-64.2002	-64.2002
-136	-64.2176	-64.2176
-135	-64.2003	-64.2003
-134	-64.2174	-64.2174
-133	-64.2004	-64.2004
-132	-64.2172	-64.2172
-131	-64.2006	-64.2006
-130	-64.217	-64.217
-129	-64.2007	-64.2007
-128	-64.2168	-64.2168
-127	-64.2008	-64.2008
-126	-64.2166	-64.2166
-125	-64.2009	-64.2009
-124	-64.2164	-64.2164
-123	-64.201	-64.201
-122	-64.2162	-64.2162
-121	-64.2011	-64.2011
-120	-64.2161	-64.2161
-119	-64.2012	-64.2012
-118	-64.2159	-64.2159
-117	-64.2013	-64.2013
-116	-64.2158	-64.2158
-115	-64.2014	-64.2014
-114	-64.2156	-64.2156
-113	-64.2015	-64.2015
-112	-64.2155	-64.2155
-111	-64.2016	-64.2016
-110	-64.2153	-64.2153
-109	-64.2016	-64.2016
-108	-64.2152	-64.2152
-107	-64.2017	-64.2017
-106	-64.2151	-64.2151
-105	-64.2018	-64.2018
-104	-64.2149	-64.2149
-103	-64.2019	-64.2019
-102	-64.2148	-64.2148
-101	-64.202	-64.202
-100	-64.2147	-64.2147
-99	-64.2021	-64.2021
-98	-64.2146	-64.2146
-97	-64.2022	-64.2022
-96	-64.2145	-64.2145
-95	-64.2023	-64.2023
-94	-64.2144	-64.2144
-93	-64.2023	-64.2023
-92	-64.2143	-64.2143
-91	-64.2024	-64.2024
-90	-64.2142	-64.2142
-89	-64.2025	-64.2025
-88	-64.2141	-64.2141
-87	-64.2026	-64.2026
-86	-64.214	-64.214
-85	-64.2027	-64.2027
-84	-64.2139	-64.2139
-83	-64.2027	-64.2027
-82	-64.2138	-64.2138
-81	-64.2028	-64.2028
-80	-64.2137	-64.2137
-79	-64.2029	-64.2029
-78	-64.2136	-64.2136
-77	-64.2029	-64.2029
-76	-64.2136	-64.2136
-75	-64.203	-64.203
-74	-64.2135	-64.2135
-73	-64.2031	-64.2031
-72	-64.2134	-64.2134
-71	-64.2031	-64.2031
-70	-64.2133	-64.2133
-69	-64.2032	-64.2032
-68	-64.2133	-64.2133
-67	-64.2033	-64.2033
-66	-64.2132	-64.2132
-65	-64.2033	-64.2033
-64	-64.2131	-64.2131
-63	-64.2034	-64.2034
-62	-64.2131	-64.2131
-61	-64.2035	-64.2035
-60	-64.213	-64.213
-59	-64.2035	-64.2035
-58	-64.2129	-64.2129
-57	-64.2036	-64.2036
-56	-64.2129	-64.2129
-55	-64.2036	-64.2036
-54	-64.2128	-64.2128
-53	-64.2037	-64.2037
-52	-64.2127	-64.2127
-51	-64.2037	-64.2037
-50	-64.2127	-64.2127
-49	-64.2038	-64.2038
-48	-64.2126	-64.2126
-47	-64.2038	-64.2038
-46	-64.2126	-64.2126
-45	-64.2039	-64.2039
-44	-64.2125	-64.2125
-43	-64.2039	-64.2039
-42	-64.2125	-64.2125
-41	-64.204	-64.204
-40	-64.2124	-64.2124
-39	-64.204	-64.204
-38	-64.2124	-64.2124
-37	-64.2041	-64.2041
-36	-64.2123	-64.2123
-35	-64.2041	-64.2041
-34	-64.2123	-64.2123
-33	-64.2042	-64.2042
-32	-64.2122	-64.2122
-31	-64.2042	-64.2042
-30	-64.2122	-64.2122
-29	-64.2043	-64.2043
-28	-64.2121	-64.2121
-27	-64.2043	-64.2043
-26	-64.2121	-64.2121
-25	-64.2043	-64.2043
-24	-64.212	-64.212
-23	-64.2044	-64.2044
-22	-64.212	-64.212
-21	-64.2044	-64.2044
-20	-64.212	-64.212
-19	-64.2045	-64.2045
-18	-64.2119	-64.2119
-17	-64.2045	-64.2045
-16	-64.2119	-64.2119
-15	-64.2045	-64.2045
-14	-64.2118	-64.2118
-13	-64.2046	-64.2046
-12	-64.2118	-64.2118
-11	-64.2046	-64.2046
-10	-64.2118	-64.2118
-9	-64.2047	-64.2047
-8	-64.2117	-64.2117
-7	-64.2047	-64.2047
-6	-64.2117	-64.2117
-5	-64.2047	-64.2047
-4	-64.2117	-64.2117
-3	-64.2048	-64.2048
-2	-64.2116	-64.2116
-1	-64.2048	-64.2048
0	-64.2116	-64.2116
1	-64.2048	-64.2048
2	-64.2116	-64.2116
3	-64.2049	-64.2049
4	-64.2115	-64.2115
5	-64.2049	-64.2049
6	-64.2115	-64.2115
7	-64.2049	-64.2049
8	-64.2115	-64.2115
9	-64.205	-64.205
10	-64.2114	-64.2114
11	-64.205	-64.205
12	-64.2114	-64.2114
13	-64.205	-64.205
14	-64.2114	-64.2114
15	-64.205	-64.205
16	-64.2113	-64.2113
17	-64.2051	-64.2051
18	-64.2113	-64.2113
19	-64.2051	-64.2051
20	-64.2113	-64.2113
21	-64.2051	-64.2051
22	-64.2113	-64.2113
23	-64.2052	-64.2052
24	-64.2112	-64.2112
25	-64.2052	-64.2052
26	-64.2112	-64.2112
27	-64.2052	-64.2052
28	-64.2112	-64.2112
29	-64.2052	-64.2052
30	-64.2112	-64.2112
31	-64.2053	-64.2053
32	-64.2111	-64.2111
33	-64.2053	-64.2053
34	-64.2111	-64.2111
35	-64.2053	-64.2053
36	-64.2111	-64.2111
37	-64.2053	-64.2053
38	-64.2111	-64.2111
39	-64.2054	-64.2054
40	-64.211	-64.211
41	-64.2054	-64.2054
42	-64.211	-64.211
43	-64.2054	-64.2054
44	-64.211	-64.211
45	-64.2054	-64.2054
46	-64.211	-64.211
47	-64.2054	-64.2054
48	-64.2109	-64.2109
49	-64.2055	-64.2055
50	-64.2109	-64.2109
51	-64.2055	-64.2055
52	-64.2109	-64.2109
53	-64.2055	-64.2055
54	-64.2109	-64.2109
55	-64.2055	-64.2055
56	-64.2109	-64.2109
57	-64.2056	-64.2056
58	-64.2108	-64.2108
59	-64.2056	-64.2056
60	-64.2108	-64.2108
61	-64.2056	-64.2056
62	-64.2108	-64.2108
63	-64.2056	-64.2056
64	-64.2108	-64.2108
65	-64.2056	-64.2056
66	-64.2108	-64.2108
67	-64.2057	-64.2057
68	-64.2107	-64.2107
69	-64.2057	-64.2057
70	-64.2107	-64.2107
71	-64.2057	-64.2057
72	-64.2107	-64.2107
73	-64.2057	-64.2057
74	-64.2107	-64.2107
75	-64.2057	-64.2057
76	-64.2107	-64.2107
77	-64.2057	-64.2057
78	-64.2106	-64.2106
79	-64.2058	-64.2058
80	-63.9235	-63.8402
81	-63.5749	-63.3779
82	-63.3176	-63.0428
83	-63.1179	-62.7785
84	-62.9979	-62.625
85	-62.9128	-62.5105
86	-62.8796	-62.4687
87	-62.8626	-62.443
88	-62.8797	-62.4655
89	-62.9014	-62.4907
90	-62.9465	-62.5488
91	-62.989	-62.602
92	-63.0485	-62.6782
93	-63.1008	-62.7452
94	-63.166	-62.8288
95	-63.2216	-62.9007
96	-63.2874	-62.9853
97	-63.3421	-63.0569
98	-63.4056	-63.1385
99	-63.457	-63.2066
100	-63.5165	-63.2832
101	-63.5635	-63.346
102	-63.6181	-63.4164
103	-63.6601	-63.4732
104	-63.7095	-63.537
105	-63.7465	-63.5874
106	-63.7908	-63.6446
107	-63.8228	-63.6888
108	-63.8622	-63.7397
109	-63.8896	-63.778
110	-63.9244	-63.823
111	-63.9475	-63.8557
112	-63.9782	-63.8952
113	-63.9974	-63.9229
114	-64.0243	-63.9575
115	-64.0401	-63.9807
116	-64.0636	-64.0108
117	-64.0763	-64.0299
118	-64.097	-64.0562
119	-64.107	-64.0716
120	-64.125	-64.0944
121	-64.1326	-64.1067
122	-64.1484	-64.1265
123	-64.154	-64.136
124	-64.1679	-64.1532
125	-64.1717	-64.1603
126	-64.1839	-64.1752
127	-64.1863	-64.1803
128	-64.1969	-64.1932
129	-64.1981	-64.1965
130	-64.2075	-64.2077
131	-64.2075	-64.2096
132	-64.2159	-64.2193
133	-64.2151	-64.22
134	-64.2226	-64.2285
135	-64.221	-64.228
136	-64.2277	-64.2355
137	-64.2255	-64.2342
138	-64.2316	-64.2409
139	-64.2288	-64.2388
140	-64.2344	-64.2447
141	-64.2312	-64.2421
142	-64.2364	-64.2474
143	-64.2328	-64.2442
144	-64.2376	-64.249
145	-64.2338	-64.2455
146	-64.2383	-64.2499
147	-64.2343	-64.2461
148	-64.2385	-64.2501
149	-64.2343	-64.246
150	-64.2383	-64.2498
151	-64.2341	-64.2456
152	-64.2379	-64.2492
153	-64.2335	-64.2447
154	-64.2372	-64.2482
155	-64.2328	-64.2436
156	-64.2364	-64.2469
157	-63.6696	-63.6211
158	-63.0143	-62.8579
159	-62.5348	-62.3018
160	-62.1858	-61.8939
161	-61.9677	-61.6415
162	-61.8287	-61.4735
163	-61.7625	-61.3954
164	-61.7428	-61.3642
165	-61.7622	-61.3847
166	-61.8097	-61.4316
167	-61.8764	-61.5072
168	-61.9603	-61.5976
169	-62.0514	-61.7021
170	-62.1532	-61.8146
171	-62.2547	-61.932
172	-62.363	-62.0533
173	-62.4663	-62.1735
174	-62.574	-62.2955
175	-62.6742	-62.4125
176	-62.7773	-62.5301
177	-62.8712	-62.6405
178	-62.9675	-62.751
179	-63.0538	-62.8527
180	-63.1421	-62.9547
181	-63.22	-63.047
182	-63.3	-63.1397
183	-63.3695	-63.2225
184	-63.4411	-63.306
185	-63.5025	-63.3793
186	-63.5662	-63.4538
187	-63.6198	-63.5182
188	-63.6761	-63.5841
189	-63.7226	-63.6402
190	-63.772	-63.6982
191	-63.8119	-63.7466
192	-63.855	-63.7974
193	-63.889	-63.8387
194	-63.9265	-63.8829
195	-63.9552	-63.9179
196	-63.9876	-63.9561
197	-64.0116	-63.9855
198	-64.0396	-64.0184
199	-64.0594	-64.0428
200	-64.0834	-64.071
201	-64.0996	-64.0909
202	-64.1202	-64.1151
203	-64.1331	-64.1311
204	-64.1507	-64.1516
205	-64.1609	-64.1643
206	-64.1759	-64.1817
207	-64.1837	-64.1915
208	-64.1965	-64.2061
209	-64.2022	-64.2134
210	-64.2131	-64.2258
211	-64.2171	-64.2309
212	-64.2264	-64.2413
213	-64.2289	-64.2446
214	-64.2368	-64.2533
215	-64.238	-64.2551
216	-64.2448	-64.2624
217	-64.245	-64.2629
218	-64.2507	-64.269
219	-64.2501	-64.2685
220	-64.255	-64.2736
221	-64.2537	-64.2722
222	-64.2579	-64.2765
223	-64.256	-64.2744
224	-64.2597	-64.2781
225	-64.2573	-64.2754
226	-64.2606	-64.2785
227	-64.2578	-64.2753
228	-64.2607	-64.278
229	-64.2576	-64.2745
230	-64.2602	-64.2769
231	-64.2568	-64.2731
232	-64.2592	-64.2751
233	-64.2557	-64.2712
234	-63.6432	-63.6036
235	-62.9295	-62.7564
236	-62.4167	-62.1674
237	-62.0347	-61.7154
238	-61.8073	-61.4542
239	-61.6504	-61.2627
240	-61.5872	-61.1875
241	-61.5576	-61.1438
242	-61.5864	-61.1732
243	-61.6285	-61.2139
244	-61.708	-61.3019
245	-61.7891	-61.3898
246	-61.8947	-61.5086
247	-61.9952	-61.6208
248	-62.1118	-61.7534
249	-62.2194	-61.8756
250	-62.3381	-62.0114
251	-62.4454	-62.1347
252	-62.5605	-62.2672
253	-62.6632	-62.3863
254	-62.7716	-62.5118
255	-62.8672	-62.6236
256	-62.9674	-62.74
257	-63.0546	-62.8429
258	-63.1458	-62.9493
259	-63.2244	-63.0426
260	-63.3065	-63.1387
261	-63.3763	-63.2222
262	-63.4496	-63.3084
263	-63.511	-63.3824
264	-63.576	-63.4589
265	-63.6295	-63.5239
266	-63.6868	-63.5914
267	-63.733	-63.648
268	-63.7832	-63.7072
269	-63.8228	-63.756
270	-63.8665	-63.8077
271	-63.9002	-63.8494
272	-63.9381	-63.8942
273	-63.9664	-63.9295
274	-63.9992	-63.9682
275	-64.0227	-63.9978
276	-64.0509	-64.031
277	-64.0702	-64.0555
278	-64.0945	-64.0838
279	-64.1101	-64.1039
280	-64.1308	-64.128
281	-64.1433	-64.1441
282	-64.161	-64.1645
283	-64.1707	-64.1772
284	-64.1857	-64.1944
285	-64.193	-64.2042
286	-64.2058	-64.2186
287	-64.2111	-64.2259
288	-64.222	-64.2379
289	-64.2255	-64.243
290	-64.2348	-64.253
291	-64.2368	-64.2563
292	-64.2447	-64.2646
293	-64.2455	-64.2663
294	-64.2522	-64.2732
295	-64.2521	-64.2737
296	-64.2577	-64.2793
297	-64.2567	-64.2787
298	-64.2616	-64.2834
299	-64.2599	-64.2819
300	-64.2641	-64.2858
301	-64.2618	-64.2836
302	-64.2655	-64.2868
303	-64.2627	-64.284
304	-64.2659	-64.2867
305	-64.2628	-64.2835
306	-64.2657	-64.2857
307	-64.2623	-64.2822
308	-64.2648	-64.284
309	-64.2612	-64.2803
310	-64.2635	-64.2819
311	-63.6424	-63.5925
312	-62.9497	-62.7533
313	-62.4372	-62.1578
314	-62.0687	-61.7141
315	-61.8385	-61.448
316	-61.6905	-61.2642
317	-61.6228	-61.1839
318	-61.5997	-61.1473
319	-61.6228	-61.1713
320	-61.67	-61.2186
321	-61.7432	-61.3008
322	-61.8286	-61.3949
323	-61.9276	-61.5078
324	-62.0318	-61.6259
325	-62.1418	-61.7524
326	-62.2528	-61.8803
327	-62.3647	-62.0099
328	-62.4754	-62.1388
329	-62.5839	-62.2651
330	-62.6899	-62.3897
331	-62.7918	-62.509
332	-62.8908	-62.6262
333	-62.9845	-62.7365
334	-63.0753	-62.8447
335	-63.1601	-62.945
336	-63.2423	-63.0436
337	-63.3182	-63.1338
338	-63.3917	-63.2226
339	-63.4589	-63.3028
340	-63.5242	-63.3821
341	-63.5832	-63.4528
342	-63.6407	-63.523
343	-63.6921	-63.5848
344	-63.7424	-63.6467
345	-63.7869	-63.7002
346	-63.8307	-63.7543
347	-63.8687	-63.8004
348	-63.9067	-63.8474
349	-63.9391	-63.8867
350	-63.9717	-63.9273
351	-63.999	-63.9605
352	-64.027	-63.9955
353	-64.0499	-64.0233
354	-64.0737	-64.0531
355	-64.0927	-64.0761
356	-64.1129	-64.1015
357	-64.1284	-64.1204
358	-64.1455	-64.1418
359	-64.158	-64.157
360	-64.1724	-64.175
361	-64.1824	-64.187
362	-64.1944	-64.2021
363	-64.2021	-64.2114
364	-64.2122	-64.224
365	-64.218	-64.2309
366	-64.2264	-64.2413
367	-64.2306	-64.2462
368	-64.2376	-64.2548
369	-64.2404	-64.2581
370	-64.2462	-64.2651
371	-64.2479	-64.2669
372	-64.2526	-64.2726
373	-64.2533	-64.2733
374	-64.2572	-64.2779
375	-64.2572	-64.2776
376	-64.2604	-64.2813
377	-64.2597	-64.2802
378	-64.2623	-64.2832
379	-64.2611	-64.2815
380	-64.2633	-64.2839
381	-64.2616	-64.2816
382	-64.2634	-64.2835
383	-64.2614	-64.2809
384	-64.2629	-64.2824
385	-64.2606	-64.2794
386	-64.2619	-64.2807
387	-64.2594	-64.2775
388	-63.6667	-63.666
389	-63.0149	-62.9035
390	-62.5325	-62.3618
391	-62.1803	-61.951
392	-61.966	-61.7077
393	-61.8219	-61.5347
394	-61.7626	-61.4637
395	-61.7369	-61.4264
396	-61.7643	-61.4527
397	-61.805	-61.4927
398	-61.8801	-61.5732
399	-61.957	-61.6561
400	-62.0564	-61.765
401	-62.151	-61.8695
402	-62.2606	-61.991
403	-62.3616	-62.1041
404	-62.4728	-62.2283
405	-62.5732	-62.342
406	-62.6809	-62.4629
407	-62.7768	-62.5723
408	-62.8781	-62.6866
409	-62.9671	-62.7889
410	-63.0605	-62.8947
411	-63.1417	-62.9886
412	-63.2265	-63.085
413	-63.2994	-63.1698
414	-63.3756	-63.2568
415	-63.4403	-63.3325
416	-63.5081	-63.4102
417	-63.565	-63.477
418	-63.625	-63.5459
419	-63.6745	-63.6044
420	-63.7273	-63.665
421	-63.77	-63.7157
422	-63.8161	-63.7687
423	-63.8526	-63.8124
424	-63.8927	-63.8584
425	-63.9238	-63.8957
426	-63.9585	-63.9355
427	-63.9845	-63.9669
428	-64.0145	-64.0011
429	-64.0362	-64.0274
430	-64.0619	-64.0567
431	-64.0797	-64.0785
432	-64.1017	-64.1034
433	-64.1162	-64.1211
434	-64.135	-64.1422
435	-64.1466	-64.1565
436	-64.1626	-64.1743
437	-64.1716	-64.1855
438	-64.1852	-64.2004
439	-64.1921	-64.209
440	-64.2036	-64.2215
441	-64.2086	-64.2279
442	-64.2183	-64.2382
443	-64.2218	-64.2427
444	-64.23	-64.2512
445	-64.2322	-64.2542
446	-64.2391	-64.2612
447	-64.2402	-64.2628
448	-64.2461	-64.2685
449	-64.2462	-64.269
450	-64.2512	-64.2737
451	-64.2506	-64.2732
452	-64.2548	-64.277
453	-64.2535	-64.2758
454	-64.2571	-64.2789
455	-64.2554	-64.2771
456	-64.2585	-64.2796
457	-64.2563	-64.2773
458	-64.259	-64.2793
459	-64.2565	-64.2767
460	-64.2588	-64.2783
461	-64.2561	-64.2754
462	-64.2581	-64.2767
463	-64.2552	-64.2735
464	-64.2571	-64.2747
465	-63.7233	-63.7132
466	-63.117	-63.0032
467	-62.6618	-62.4862
468	-62.3328	-62.1019
469	-62.1245	-61.8642
470	-61.9913	-61.7039
471	-61.9283	-61.6294
472	-61.9076	-61.598
473	-61.9267	-61.6164
474	-61.9695	-61.6587
475	-62.0339	-61.7292
476	-62.1113	-61.8124
477	-62.1991	-61.9103
478	-62.2933	-62.0142
479	-62.391	-62.1242
480	-62.4913	-62.2364
481	-62.5907	-62.349
482	-62.6905	-62.4616
483	-62.7867	-62.5713
484	-62.8821	-62.6798
485	-62.9724	-62.7832
486	-63.0612	-62.8848
487	-63.144	-62.9802
488	-63.2253	-63.0737
489	-63.3002	-63.1602
490	-63.3735	-63.2449
491	-63.4403	-63.3225
492	-63.5058	-63.3985
493	-63.5647	-63.4672
494	-63.6227	-63.5347
495	-63.6742	-63.595
496	-63.7252	-63.6545
497	-63.7699	-63.7071
498	-63.8143	-63.7592
499	-63.8528	-63.8045
500	-63.8914	-63.8498
501	-63.9243	-63.8886
502	-63.9576	-63.9277
503	-63.9854	-63.9607
504	-64.014	-63.9943
505	-64.0373	-64.022
506	-64.0617	-64.0507
507	-64.0812	-64.0738
508	-64.1019	-64.0981
509	-64.1179	-64.1171
510	-64.1354	-64.1376
511	-64.1484	-64.1531
512	-64.1632	-64.1703
513	-64.1736	-64.1826
514	-64.186	-64.1969
515	-64.1941	-64.2066
516	-64.2045	-64.2185
517	-64.2107	-64.2259
518	-64.2193	-64.2356
519	-64.224	-64.241
520	-64.2311	-64.249
521	-64.2343	-64.2528
522	-64.2402	-64.2592
523	-64.2423	-64.2616
524	-64.2471	-64.2668
525	-64.2482	-64.2681
526	-64.2522	-64.2722
527	-64.2525	-64.2725
528	-64.2557	-64.2757
529	-64.2554	-64.2752
530	-64.258	-64.2777
531	-64.2571	-64.2766
532	-64.2593	-64.2786
533	-64.258	-64.2769
534	-64.2597	-64.2784
535	-64.258	-64.2763
536	-64.2595	-64.2775
537	-64.2575	-64.2751
538	-64.2587	-64.2759
539	-64.2566	-64.2733
540	-64.2576	-64.2739
541	-63.7212	-63.7302
542	-63.1162	-63.0446
543	-62.6726	-62.5466
544	-62.3465	-62.1733
545	-62.1465	-61.9449
546	-62.0147	-61.7888
547	-61.9572	-61.7185
548	-61.9363	-61.6876
549	-61.9588	-61.7073
550	-62.0002	-61.7479
551	-62.0665	-61.8178
552	-62.1417	-61.8979
553	-62.2303	-61.9941
554	-62.3219	-62.0942
555	-62.4197	-62.2018
556	-62.5172	-62.3097
557	-62.6163	-62.4198
558	-62.7131	-62.528
559	-62.8088	-62.6349
560	-62.9013	-62.739
561	-62.9909	-62.8397
562	-63.077	-62.9372
563	-63.1591	-63.0299
564	-63.2378	-63.1194
565	-63.312	-63.2035
566	-63.3829	-63.2845
567	-63.4491	-63.3598
568	-63.5123	-63.4323
569	-63.5708	-63.4991
570	-63.6267	-63.5633
571	-63.6779	-63.6219
572	-63.727	-63.6785
573	-63.7715	-63.7295
574	-63.8143	-63.7788
575	-63.8527	-63.8229
576	-63.8897	-63.8657
577	-63.9226	-63.9035
578	-63.9546	-63.9404
579	-63.9825	-63.9724
580	-64.0099	-64.004
581	-64.0335	-64.031
582	-64.0568	-64.0579
583	-64.0765	-64.0805
584	-64.0964	-64.1032
585	-64.1127	-64.1218
586	-64.1294	-64.1409
587	-64.1429	-64.1561
588	-64.1569	-64.172
589	-64.1678	-64.1842
590	-64.1795	-64.1974
591	-64.1882	-64.2071
592	-64.198	-64.2179
593	-64.2048	-64.2254
594	-64.2129	-64.2342
595	-64.2181	-64.2398
596	-64.2248	-64.247
597	-64.2286	-64.251
598	-64.2341	-64.2567
599	-64.2368	-64.2593
600	-64.2412	-64.2639
601	-64.243	-64.2654
602	-64.2465	-64.269
603	-64.2475	-64.2696
604	-64.2504	-64.2723
605	-64.2507	-64.2722
606	-64.253	-64.2742
607	-64.2527	-64.2735
608	-64.2545	-64.275
609	-64.2538	-64.2738
610	-64.2553	-64.2749
611	-64.2542	-64.2732
612	-64.2554	-64.274
613	-64.254	-64.272
614	-64.2549	-64.2725
615	-64.2533	-64.2703
616	-64.254	-64.2706
617	-64.2523	-64.2682
618	-63.7992	-63.755
619	-63.2803	-63.1148
620	-62.8899	-62.6512
621	-62.6033	-62.2986
622	-62.424	-62.0869
623	-62.3064	-61.9384
624	-62.2537	-61.8757
625	-62.234	-61.8453
626	-62.2533	-61.8673
627	-62.289	-61.9042
628	-62.348	-61.9733
629	-62.4135	-62.0474
630	-62.4929	-62.141
631	-62.5728	-62.2335
632	-62.6607	-62.3376
633	-62.7455	-62.4372
634	-62.8347	-62.5434
635	-62.9187	-62.6429
636	-63.0049	-62.746
637	-63.0848	-62.8413
638	-63.1656	-62.9384
639	-63.2395	-63.0272
640	-63.3137	-63.1166
641	-63.3807	-63.1978
642	-63.4478	-63.279
643	-63.5078	-63.352
644	-63.5678	-63.4249
645	-63.6207	-63.4898
646	-63.6739	-63.5545
647	-63.7202	-63.6116
648	-63.7669	-63.6687
649	-63.8071	-63.7185
650	-63.8479	-63.7684
651	-63.8824	-63.8114
652	-63.9178	-63.8548
653	-63.9472	-63.8917
654	-63.9778	-63.9292
655	-64.0027	-63.9606
656	-64.0289	-63.9928
657	-64.0497	-64.0192
658	-64.0722	-64.0467
659	-64.0895	-64.0687
660	-64.1086	-64.0921
661	-64.1227	-64.1102
662	-64.1389	-64.13
663	-64.1504	-64.1448
664	-64.1641	-64.1614
665	-64.1732	-64.1733
666	-64.1847	-64.1872
667	-64.1919	-64.1965
668	-64.2015	-64.208
669	-64.207	-64.2152
670	-64.215	-64.2247
671	-64.219	-64.2301
672	-64.2257	-64.2379
673	-64.2285	-64.2417
674	-64.2341	-64.2481
675	-64.2358	-64.2505
676	-64.2404	-64.2557
677	-64.2413	-64.2571
678	-64.2451	-64.2613
679	-64.2453	-64.2617
680	-64.2485	-64.2651
681	-64.248	-64.2648
682	-64.2507	-64.2675
683	-64.2498	-64.2666
684	-64.2519	-64.2687
685	-64.2506	-64.2673
686	-64.2524	-64.2689
687	-64.2508	-64.2672
688	-64.2524	-64.2684
689	-64.2505	-64.2664
690	-64.2518	-64.2674
691	-64.2498	-64.2651
692	-64.2509	-64.2658
693	-64.2487	-64.2634
694	-64.2497	-64.264
695	-63.7814	-63.7379
696	-63.2383	-63.0959
697	-62.8371	-62.6254
698	-62.5407	-62.2731
699	-62.3564	-62.0575
700	-62.2363	-61.9105
701	-62.1815	-61.8453
702	-62.1629	-61.817
703	-62.1816	-61.8373
704	-62.2202	-61.8767
705	-62.2793	-61.9445
706	-62.3489	-62.0213
707	-62.4287	-62.1137
708	-62.5131	-62.2093
709	-62.6015	-62.3122
710	-62.6911	-62.415
711	-62.7807	-62.5198
712	-62.8696	-62.6227
713	-62.9561	-62.7244
714	-63.0408	-62.8232
715	-63.1217	-62.9187
716	-63.2003	-63.011
717	-63.2744	-63.0988
718	-63.3461	-63.1834
719	-63.4129	-63.2628
720	-63.4774	-63.3393
721	-63.5368	-63.4103
722	-63.5942	-63.4786
723	-63.6466	-63.5414
724	-63.6972	-63.6019
725	-63.743	-63.6569
726	-63.7873	-63.71
727	-63.827	-63.7578
728	-63.8655	-63.8041
729	-63.8996	-63.8453
730	-63.9329	-63.8855
731	-63.962	-63.9207
732	-63.9906	-63.9552
733	-64.0153	-63.9851
734	-64.0397	-64.0147
735	-64.0605	-64.0398
736	-64.0813	-64.065
737	-64.0985	-64.0859
738	-64.1161	-64.1072
739	-64.1304	-64.1245
740	-64.1452	-64.1423
741	-64.1568	-64.1564
742	-64.1693	-64.1713
743	-64.1786	-64.1826
744	-64.189	-64.195
745	-64.1964	-64.2039
746	-64.2049	-64.2141
747	-64.2107	-64.221
748	-64.2178	-64.2293
749	-64.2221	-64.2345
750	-64.2279	-64.2412
751	-64.2311	-64.245
752	-64.2358	-64.2503
753	-64.2379	-64.2529
754	-64.2418	-64.2571
755	-64.2431	-64.2586
756	-64.2461	-64.2619
757	-64.2467	-64.2626
758	-64.2492	-64.2652
759	-64.2492	-64.2652
760	-64.2512	-64.2671
761	-64.2508	-64.2665
762	-64.2523	-64.2679
763	-64.2515	-64.2669
764	-64.2527	-64.2679
765	-64.2516	-64.2665
766	-64.2525	-64.2672
767	-64.2511	-64.2655
768	-64.2519	-64.266
769	-64.2503	-64.2641
770	-64.2509	-64.2643
771	-64.2492	-64.2623
772	-63.7981	-63.798
773	-63.2747	-63.2069
774	-62.8849	-62.7755
775	-62.5949	-62.4471
776	-62.4169	-62.2479
777	-62.2965	-62.1088
778	-62.2454	-62.049
779	-62.2234	-62.0201
780	-62.2442	-62.0401
781	-62.2781	-62.0743
782	-62.3387	-62.1389
783	-62.4028	-62.2078
784	-62.4836	-62.2955
785	-62.5625	-62.3818
786	-62.6517	-62.4794
787	-62.7357	-62.5722
788	-62.8261	-62.6716
789	-62.9096	-62.7644
790	-62.9969	-62.8609
791	-63.0764	-62.9496
792	-63.1582	-63.0404
793	-63.2318	-63.123
794	-63.3069	-63.2065
795	-63.3738	-63.2818
796	-63.4418	-63.3575
797	-63.5016	-63.4252
798	-63.5624	-63.4931
799	-63.6153	-63.5531
800	-63.6691	-63.6133
801	-63.7155	-63.6661
802	-63.7628	-63.719
803	-63.803	-63.7649
804	-63.8443	-63.8111
805	-63.8789	-63.8507
806	-63.9148	-63.8908
807	-63.9443	-63.9247
808	-63.9753	-63.9592
809	-64.0002	-63.988
810	-64.0268	-64.0176
811	-64.0478	-64.0417
812	-64.0705	-64.067
813	-64.0879	-64.0871
814	-64.1073	-64.1084
815	-64.1215	-64.125
816	-64.1379	-64.1429
817	-64.1495	-64.1564
818	-64.1634	-64.1714
819	-64.1726	-64.1822
820	-64.1843	-64.1947
821	-64.1915	-64.2032
822	-64.2013	-64.2135
823	-64.2068	-64.22
824	-64.2149	-64.2285
825	-64.219	-64.2333
826	-64.2258	-64.2402
827	-64.2286	-64.2436
828	-64.2342	-64.2492
829	-64.236	-64.2514
830	-64.2406	-64.2559
831	-64.2416	-64.2571
832	-64.2454	-64.2606
833	-64.2457	-64.261
834	-64.2488	-64.2638
835	-64.2485	-64.2636
836	-64.251	-64.2657
837	-64.2502	-64.2649
838	-64.2523	-64.2666
839	-64.2511	-64.2653
840	-64.2528	-64.2666
841	-64.2513	-64.265
842	-64.2528	-64.2659
843	-64.251	-64.264
844	-64.2522	-64.2647
845	-64.2503	-64.2626
846	-64.2513	-64.2631
847	-64.2492	-64.2608
848	-64.2501	-64.2612
849	-64.2479	-64.2588
850	-64.2486	-64.259
851	-64.2464	-64.2566
852	-64.247	-64.2568
853	-64.2448	-64.2543
854	-64.2453	-64.2544
855	-64.243	-64.252
856	-64.2436	-64.2521
857	-64.2413	-64.2496
858	-64.2418	-64.2497
859	-64.2395	-64.2472
860	-64.24	-64.2473
861	-64.2378	-64.2449
862	-64.2383	-64.245
863	-64.236	-64.2426
864	-64.2365	-64.2427
865	-64.2343	-64.2404
866	-64.2349	-64.2406
867	-64.2327	-64.2383
868	-64.2332	-64.2385
869	-64.2311	-64.2363
870	-64.2317	-64.2365
871	-64.2296	-64.2343
872	-64.2302	-64.2346
873	-64.2281	-64.2325
874	-64.2288	-64.2328
875	-64.2268	-64.2308
876	-64.2274	-64.2311
877	-64.2255	-64.2291
878	-64.2261	-64.2295
879	-64.2242	-64.2276
880	-64.2249	-64.228
881	-64.2231	-64.2261
882	-64.2238	-64.2266
883	-64.222	-64.2248
884	-64.2227	-64.2253
885	-64.2209	-64.2235
886	-64.2217	-64.2241
887	-64.22	-64.2223
888	-64.2208	-64.2229
889	-64.2191	-64.2212
890	-64.2199	-64.2218
891	-64.2182	-64.2202
892	-64.2191	-64.2208
893	-64.2175	-64.2192
894	-64.2183	-64.2199
895	-64.2167	-64.2183
896	-64.2176	-64.2191
897	-64.216	-64.2175
898	-64.217	-64.2183
899	-64.2154	-64.2168
900	-64.2163	-64.2175
901	-64.2148	-64.216
902	-64.2158	-64.2168
903	-64.2143	-64.2154
904	-64.2152	-64.2162
905	-64.2138	-64.2148
906	-64.2148	-64.2156
907	-64.2133	-64.2142
908	-64.2143	-64.2151
909	-64.2129	-64.2137
910	-64.2139	-64.2146
911	-64.2125	-64.2132
912	-64.2135	-64.2141
913	-64.2121	-64.2128
914	-64.2131	-64.2137
915	-64.2118	-64.2124
916	-64.2128	-64.2133
917	-64.2114	-64.212
918	-64.2125	-64.2129
919	-64.2112	-64.2117
920	-64.2122	-64.2126
921	-64.2109	-64.2113
922	-64.2119	-64.2123
923	-64.2106	-64.2111
924	-64.2117	-64.212
925	-64.2104	-64.2108
926	-64.2114	-64.2117
927	-64.2102	-64.2105
928	-64.2112	-64.2115
929	-64.21	-64.2103
930	-64.211	-64.2113
931	-64.2098	-64.2101
932	-64.2109	-64.2111
933	-64.2096	-64.2099
934	-64.2107	-64.2109
935	-64.2095	-64.2097
936	-64.2105	-64.2107
937	-64.2093	-64.2096
938	-64.2104	-64.2105
939	-64.2092	-64.2094
940	-64.2103	-64.2104
941	-64.2091	-64.2093
942	-64.2102	-64.2103
943	-64.209	-64.2091
944	-64.21	-64.2101
945	-64.2089	-64.209
946	-64.2099	-64.21
947	-64.2088	-64.2089
948	-64.2098	-64.2099
949	-64.2087	-64.2088
950	-64.2098	-64.2098
951	-64.2086	-64.2087
952	-64.2097	-64.2097
953	-64.2085	-64.2087
954	-64.2096	-64.2096
955	-64.2085	-64.2086
956	-64.2095	-64.2096
957	-64.2084	-64.2085
958	-64.2095	-64.2095
959	-64.2084	-64.2084
960	-64.2094	-64.2094
961	-64.2083	-64.2084
962	-64.2094	-64.2094
963	-64.2083	-64.2083
964	-64.2093	-64.2093
965	-64.2082	-64.2083
966	-64.2093	-64.2093
967	-64.2082	-64.2082
968	-64.2092	-64.2092
969	-64.2081	-64.2082
970	-64.2092	-64.2092
971	-64.2081	-64.2082
972	-64.2091	-64.2091
973	-64.2081	-64.2081
974	-64.2091	-64.2091
975	-64.208	-64.2081
976	-64.2091	-64.2091
977	-64.208	-64.2081
978	-64.209	-64.209
979	-64.208	-64.208
980	-64.209	-64.209
981	-64.208	-64.208
982	-64.209	-64.209
983	-64.2079	-64.208
984	-64.209	-64.209
985	-64.2079	-64.208
986	-64.209	-64.2089
987	-64.2079	-64.2079
988	-64.2089	-64.2089
989	-64.2079	-64.2079
990	-64.2089	-64.2089
991	-64.2079	-64.2079
992	-64.2089	-64.2089
993	-64.2079	-64.2079
994	-64.2089	-64.2089
995	-64.2078	-64.2079
996	-64.2089	-64.2088
997	-64.2078	-64.2079
998	-64.2089	-64.2088
999	-64.2078	-64.2079
1000	-64.2088	-64.2088
1001	-64.2078	-64.2078
1002	-64.2088	-64.2088
1003	-64.2078
1004	-64.2088
1005	-64.2078
1006	-64.2088
1007	-64.2078
1008	-64.2088
1009	-64.2078
1010	-64.2088
1011	-64.2078
1012	-64.2088
1013	-64.2078
1014	-64.2088
1015	-64.2078
1016	-64.2088
1017	-64.2078
1018	-64.2088
1019	-64.2078
1020	-64.2088
1021	-64.2078
1022	-64.2087
1023	-64.2078
1024	-64.2087
1025	-64.2078
1026	-64.2087
1027	-64.2078
1028	-64.2087
1029	-64.2077
1030	-64.2087
1031	-64.2077
1032	-64.2087
1033	-64.2077
1034	-64.2087
1035	-64.2077
1036	-64.2087
1037	-64.2077
1038	-64.2087
1039	-64.2077
1040	-64.2087
1041	-64.2077
1042	-64.2087
1043	-64.2077
1044	-64.2087
1045	-64.2077
1046	-64.2087
1047	-64.2077
1048	-64.2087
1049	-64.2077
1050	-64.2087
1051	-64.2077
1052	-64.2087
1053	-64.2077
1054	-64.2087
1055	-64.2077
1056	-64.2087
1057	-64.2077
1058	-64.2087
1059	-64.2077
1060	-64.2087
1061	-64.2077
1062	-64.2087
1063	-64.2077
1064	-64.2087
1065	-64.2077
1066	-64.2087
1067	-64.2077
1068	-64.2087
1069	-64.2077
1070	-64.2087
1071	-64.2077
1072	-64.2087
1073	-64.2077
1074	-64.2087
1075	-64.2077
1076	-64.2087
1077	-64.2077
1078	-64.2087
1079	-64.2077
1080	-64.2087
1081	-64.2077
1082	-64.2087
1083	-64.2077
1084	-64.2087
1085	-64.2077
1086	-64.2087
1087	-64.2077
1088	-64.2087
1089	-64.2077
1090	-64.2087
1091	-64.2077
1092	-64.2087
1093	-64.2078
1094	-64.2087
1095	-64.2078
1096	-64.2087
1097	-64.2078
1098	-64.2087
1099	-64.2078
1100	-64.2087
1101	-64.2078
1102	-64.2087
1103	-64.2078
1104	-64.2086
1105	-64.2078
1106	-64.2086
1107	-64.2078
1108	-64.2086
1109	-64.2078
1110	-64.2086
1111	-64.2078
1112	-64.2086
1113	-64.2078
1114	-64.2086
1115	-64.2078
1116	-64.2086
1117	-64.2078
1118	-64.2086
1119	-64.2078
1120	-64.2086
1121	-64.2078
1122	-64.2086
1123	-64.2078
1124	-64.2086
1125	-64.2078
1126	-64.2086
1127	-64.2078
1128	-64.2086
1129	-64.2078
1130	-64.2086
1131	-64.2078
1132	-64.2086
1133	-64.2078
1134	-64.2086
1135	-64.2078
1136	-64.2086
1137	-64.2078
1138	-64.2086
1139	-64.2078
1140	-64.2086
1141	-64.2078
1142	-64.2086
1143	-64.2078
1144	-64.2086
1145	-64.2078
1146	-64.2086
1147	-64.2078
1148	-64.2086
1149	-64.2078
1150	-64.2086
1151	-64.2078
1152	-64.2086
1153	-64.2078
1154	-64.2086
1155	-64.2078
1156	-64.2086
1157	-64.2078
1158	-64.2086
1159	-64.2078
1160	-64.2086
1161	-64.2078
1162	-64.2086
1163	-64.2078
1164	-64.2086
1165	-64.2078
1166	-64.2086
1167	-64.2078
1168	-64.2086
1169	-64.2078
1170	-64.2086
1171	-64.2078
1172	-64.2086
1173	-64.2078
1174	-64.2086
1175	-64.2078
1176	-64.2086
1177	-64.2078
1178	-64.2086
1179	-64.2078
1180	-64.2086
1181	-64.2078
1182	-64.2086
1183	-64.2078
1184	-64.2086
1185	-64.2078
1186	-64.2086
1187	-64.2078
1188	-64.2086
1189	-64.2078
1190	-64.2086
1191	-64.2078
1192	-64.2086
1193	-64.2078
1194	-64.2086
1195	-64.2078
1196	-64.2086
1197	-64.2078
1198	-64.2086
1199	-64.2078
1200	-64.2086
1201	-64.2078
1202	-64.2086

## Sheet: Supplement 1F
Simulations				Experiment
X_Time, ms	Y_Uniform	Y_Slope trend		X_Time, ms	Y_mV
-299	-63.7	-63.7		29	-62.5511
-298	-65.2193	-65.2193		49	-59.715
-297	-63.1998	-63.1998		69	-60.7263
-296	-64.1187	-64.1187		89	-61.5618
-295	-62.7605	-62.7605		109	-62.0674
-294	-63.5368	-63.5368		129	-62.3312
-293	-62.5494	-62.5494		149	-62.5071
-292	-63.2308	-63.2308		169	-62.5951
-291	-62.4886	-62.4886		189	-62.661
-290	-63.0986	-63.0986		209	-62.683
-289	-62.5254	-62.5254
-288	-63.0755	-63.0755
-287	-62.6209	-62.6209
-286	-63.118	-63.118
-285	-62.7481	-62.7481
-284	-63.1976	-63.1976
-283	-62.8889	-62.8889
-282	-63.2956	-63.2956
-281	-63.0319	-63.0319
-280	-63.4001	-63.4001
-279	-63.1701	-63.1701
-278	-63.5039	-63.5039
-277	-63.2994	-63.2994
-276	-63.6024	-63.6024
-275	-63.4178	-63.4178
-274	-63.6935	-63.6935
-273	-63.5246	-63.5246
-272	-63.7758	-63.7758
-271	-63.6197	-63.6197
-270	-63.8492	-63.8492
-269	-63.7036	-63.7036
-268	-63.9139	-63.9139
-267	-63.7771	-63.7771
-266	-63.9702	-63.9702
-265	-63.841	-63.841
-264	-64.0189	-64.0189
-263	-63.8964	-63.8964
-262	-64.0606	-64.0606
-261	-63.9441	-63.9441
-260	-64.0961	-64.0961
-259	-63.985	-63.985
-258	-64.1262	-64.1262
-257	-64.0199	-64.0199
-256	-64.1514	-64.1514
-255	-64.0497	-64.0497
-254	-64.1724	-64.1724
-253	-64.0749	-64.0749
-252	-64.1897	-64.1897
-251	-64.0962	-64.0962
-250	-64.204	-64.204
-249	-64.1142	-64.1142
-248	-64.2155	-64.2155
-247	-64.1293	-64.1293
-246	-64.2248	-64.2248
-245	-64.1419	-64.1419
-244	-64.2321	-64.2321
-243	-64.1524	-64.1524
-242	-64.2378	-64.2378
-241	-64.1612	-64.1612
-240	-64.2422	-64.2422
-239	-64.1684	-64.1684
-238	-64.2454	-64.2454
-237	-64.1744	-64.1744
-236	-64.2477	-64.2477
-235	-64.1793	-64.1793
-234	-64.2492	-64.2492
-233	-64.1833	-64.1833
-232	-64.2501	-64.2501
-231	-64.1866	-64.1866
-230	-64.2504	-64.2504
-229	-64.1892	-64.1892
-228	-64.2504	-64.2504
-227	-64.1913	-64.1913
-226	-64.25	-64.25
-225	-64.193	-64.193
-224	-64.2494	-64.2494
-223	-64.1943	-64.1943
-222	-64.2485	-64.2485
-221	-64.1954	-64.1954
-220	-64.2475	-64.2475
-219	-64.1962	-64.1962
-218	-64.2464	-64.2464
-217	-64.1968	-64.1968
-216	-64.2453	-64.2453
-215	-64.1973	-64.1973
-214	-64.2441	-64.2441
-213	-64.1976	-64.1976
-212	-64.2428	-64.2428
-211	-64.1979	-64.1979
-210	-64.2416	-64.2416
-209	-64.1981	-64.1981
-208	-64.2403	-64.2403
-207	-64.1982	-64.1982
-206	-64.2391	-64.2391
-205	-64.1983	-64.1983
-204	-64.2379	-64.2379
-203	-64.1983	-64.1983
-202	-64.2368	-64.2368
-201	-64.1983	-64.1983
-200	-64.2356	-64.2356
-199	-64.1983	-64.1983
-198	-64.2345	-64.2345
-197	-64.1983	-64.1983
-196	-64.2335	-64.2335
-195	-64.1983	-64.1983
-194	-64.2325	-64.2325
-193	-64.1983	-64.1983
-192	-64.2315	-64.2315
-191	-64.1983	-64.1983
-190	-64.2306	-64.2306
-189	-64.1983	-64.1983
-188	-64.2297	-64.2297
-187	-64.1983	-64.1983
-186	-64.2289	-64.2289
-185	-64.1983	-64.1983
-184	-64.2281	-64.2281
-183	-64.1984	-64.1984
-182	-64.2274	-64.2274
-181	-64.1984	-64.1984
-180	-64.2267	-64.2267
-179	-64.1984	-64.1984
-178	-64.226	-64.226
-177	-64.1985	-64.1985
-176	-64.2253	-64.2253
-175	-64.1985	-64.1985
-174	-64.2247	-64.2247
-173	-64.1986	-64.1986
-172	-64.2242	-64.2242
-171	-64.1986	-64.1986
-170	-64.2236	-64.2236
-169	-64.1987	-64.1987
-168	-64.2231	-64.2231
-167	-64.1988	-64.1988
-166	-64.2226	-64.2226
-165	-64.1988	-64.1988
-164	-64.2222	-64.2222
-163	-64.1989	-64.1989
-162	-64.2217	-64.2217
-161	-64.199	-64.199
-160	-64.2213	-64.2213
-159	-64.1991	-64.1991
-158	-64.2209	-64.2209
-157	-64.1992	-64.1992
-156	-64.2205	-64.2205
-155	-64.1993	-64.1993
-154	-64.2202	-64.2202
-153	-64.1994	-64.1994
-152	-64.2198	-64.2198
-151	-64.1995	-64.1995
-150	-64.2195	-64.2195
-149	-64.1996	-64.1996
-148	-64.2192	-64.2192
-147	-64.1997	-64.1997
-146	-64.2189	-64.2189
-145	-64.1998	-64.1998
-144	-64.2186	-64.2186
-143	-64.1999	-64.1999
-142	-64.2183	-64.2183
-141	-64.2	-64.2
-140	-64.2181	-64.2181
-139	-64.2001	-64.2001
-138	-64.2178	-64.2178
-137	-64.2002	-64.2002
-136	-64.2176	-64.2176
-135	-64.2003	-64.2003
-134	-64.2174	-64.2174
-133	-64.2004	-64.2004
-132	-64.2172	-64.2172
-131	-64.2006	-64.2006
-130	-64.217	-64.217
-129	-64.2007	-64.2007
-128	-64.2168	-64.2168
-127	-64.2008	-64.2008
-126	-64.2166	-64.2166
-125	-64.2009	-64.2009
-124	-64.2164	-64.2164
-123	-64.201	-64.201
-122	-64.2162	-64.2162
-121	-64.2011	-64.2011
-120	-64.2161	-64.2161
-119	-64.2012	-64.2012
-118	-64.2159	-64.2159
-117	-64.2013	-64.2013
-116	-64.2158	-64.2158
-115	-64.2014	-64.2014
-114	-64.2156	-64.2156
-113	-64.2015	-64.2015
-112	-64.2155	-64.2155
-111	-64.2016	-64.2016
-110	-64.2153	-64.2153
-109	-64.2016	-64.2016
-108	-64.2152	-64.2152
-107	-64.2017	-64.2017
-106	-64.2151	-64.2151
-105	-64.2018	-64.2018
-104	-64.2149	-64.2149
-103	-64.2019	-64.2019
-102	-64.2148	-64.2148
-101	-64.202	-64.202
-100	-64.2147	-64.2147
-99	-64.2021	-64.2021
-98	-64.2146	-64.2146
-97	-64.2022	-64.2022
-96	-64.2145	-64.2145
-95	-64.2023	-64.2023
-94	-64.2144	-64.2144
-93	-64.2023	-64.2023
-92	-64.2143	-64.2143
-91	-64.2024	-64.2024
-90	-64.2142	-64.2142
-89	-64.2025	-64.2025
-88	-64.2141	-64.2141
-87	-64.2026	-64.2026
-86	-64.214	-64.214
-85	-64.2027	-64.2027
-84	-64.2139	-64.2139
-83	-64.2027	-64.2027
-82	-64.2138	-64.2138
-81	-64.2028	-64.2028
-80	-64.2137	-64.2137
-79	-64.2029	-64.2029
-78	-64.2136	-64.2136
-77	-64.2029	-64.2029
-76	-64.2136	-64.2136
-75	-64.203	-64.203
-74	-64.2135	-64.2135
-73	-64.2031	-64.2031
-72	-64.2134	-64.2134
-71	-64.2031	-64.2031
-70	-64.2133	-64.2133
-69	-64.2032	-64.2032
-68	-64.2133	-64.2133
-67	-64.2033	-64.2033
-66	-64.2132	-64.2132
-65	-64.2033	-64.2033
-64	-64.2131	-64.2131
-63	-64.2034	-64.2034
-62	-64.2131	-64.2131
-61	-64.2035	-64.2035
-60	-64.213	-64.213
-59	-64.2035	-64.2035
-58	-64.2129	-64.2129
-57	-64.2036	-64.2036
-56	-64.2129	-64.2129
-55	-64.2036	-64.2036
-54	-64.2128	-64.2128
-53	-64.2037	-64.2037
-52	-64.2127	-64.2127
-51	-64.2037	-64.2037
-50	-64.2127	-64.2127
-49	-64.2038	-64.2038
-48	-64.2126	-64.2126
-47	-64.2038	-64.2038
-46	-64.2126	-64.2126
-45	-64.2039	-64.2039
-44	-64.2125	-64.2125
-43	-64.2039	-64.2039
-42	-64.2125	-64.2125
-41	-64.204	-64.204
-40	-64.2124	-64.2124
-39	-64.204	-64.204
-38	-64.2124	-64.2124
-37	-64.2041	-64.2041
-36	-64.2123	-64.2123
-35	-64.2041	-64.2041
-34	-64.2123	-64.2123
-33	-64.2042	-64.2042
-32	-64.2122	-64.2122
-31	-64.2042	-64.2042
-30	-64.2122	-64.2122
-29	-64.2043	-64.2043
-28	-64.2121	-64.2121
-27	-64.2043	-64.2043
-26	-64.2121	-64.2121
-25	-64.2043	-64.2043
-24	-64.212	-64.212
-23	-64.2044	-64.2044
-22	-64.212	-64.212
-21	-64.2044	-64.2044
-20	-64.212	-64.212
-19	-64.2045	-64.2045
-18	-64.2119	-64.2119
-17	-64.2045	-64.2045
-16	-64.2119	-64.2119
-15	-64.2045	-64.2045
-14	-64.2118	-64.2118
-13	-64.2046	-64.2046
-12	-64.2118	-64.2118
-11	-64.2046	-64.2046
-10	-64.2118	-64.2118
-9	-64.2047	-64.2047
-8	-64.2117	-64.2117
-7	-64.2047	-64.2047
-6	-64.2117	-64.2117
-5	-64.2047	-64.2047
-4	-64.2117	-64.2117
-3	-64.2048	-64.2048
-2	-64.2116	-64.2116
-1	-64.2048	-64.2048
0	-64.2116	-64.2116
1	-64.2048	-64.2048
2	-64.2116	-64.2116
3	-64.2049	-64.2049
4	-64.2115	-64.2115
5	-64.2049	-64.2049
6	-64.2115	-64.2115
7	-64.2049	-64.2049
8	-64.2115	-64.2115
9	-64.205	-64.205
10	-64.2114	-64.2114
11	-64.205	-64.205
12	-64.2114	-64.2114
13	-64.205	-64.205
14	-64.2114	-64.2114
15	-64.205	-64.205
16	-64.2113	-64.2113
17	-64.2051	-64.2051
18	-64.2113	-64.2113
19	-64.2051	-64.2051
20	-64.2113	-64.2113
21	-64.2051	-64.2051
22	-64.2113	-64.2113
23	-63.8657	-63.8483
24	-63.4755	-63.4126
25	-63.1798	-63.0775
26	-62.9638	-62.8324
27	-62.825	-62.6728
28	-62.7391	-62.5727
29	-62.6965	-62.5214
30	-62.687	-62.5072
31	-62.6994	-62.5183
32	-62.7331	-62.5535
33	-62.7756	-62.5992
34	-62.8326	-62.6614
35	-62.89	-62.7249
36	-62.9581	-62.8002
37	-63.0215	-62.871
38	-63.0932	-62.951
39	-63.1569	-63.0228
40	-63.2278	-63.1023
41	-63.2887	-63.1713
42	-63.3562	-63.2473
43	-62.5223	-62.3988
44	-61.6372	-61.4064
45	-61.0251	-60.7473
46	-60.6	-60.2767
47	-60.3539	-60.006
48	-60.2031	-59.8297
49	-60.1538	-59.7668
50	-60.1541	-59.7547
51	-60.2133	-59.8088
52	-60.2989	-59.892
53	-60.4182	-60.013
54	-60.5509	-60.1506
55	-60.7011	-60.3077
56	-60.8572	-60.4738
57	-61.0202	-60.6472
58	-61.1847	-60.825
59	-61.3492	-61.0022
60	-61.5128	-61.181
61	-61.6721	-61.3539
62	-61.8292	-61.5271
63	-61.599	-61.276
64	-61.3342	-60.9578
65	-61.1801	-60.7808
66	-61.0904	-60.6686
67	-61.0771	-60.6465
68	-61.0988	-60.6608
69	-61.1644	-60.7271
70	-61.2478	-60.813
71	-61.3552	-60.9277
72	-61.4709	-61.0525
73	-61.5981	-61.1914
74	-61.7285	-61.335
75	-61.8623	-61.4833
76	-61.9965	-61.6332
77	-62.1289	-61.7815
78	-62.2602	-61.9299
79	-62.3864	-62.0726
80	-62.511	-62.2147
81	-62.6285	-62.3486
82	-62.7442	-62.4818
83	-62.4649	-62.207
84	-62.1505	-61.8534
85	-61.9407	-61.6296
86	-61.8039	-61.478
87	-61.746	-61.415
88	-61.7287	-61.3949
89	-61.7581	-61.4254
90	-61.8079	-61.4801
91	-61.8846	-61.5624
92	-61.9706	-61.6583
93	-62.0709	-61.7674
94	-62.1744	-61.8839
95	-62.2842	-62.0045
96	-62.3939	-62.1289
97	-62.5047	-62.2516
98	-62.6135	-62.3759
99	-62.7202	-62.495
100	-62.8243	-62.6146
101	-62.924	-62.7266
102	-63.021	-62.8388
103	-62.756	-62.562
104	-62.4566	-62.198
105	-62.2509	-61.9609
106	-62.115	-61.7949
107	-62.0524	-61.7176
108	-62.0289	-61.6835
109	-62.0494	-61.7006
110	-62.0897	-61.7421
111	-62.1556	-61.8118
112	-62.2302	-61.8952
113	-62.319	-61.9925
114	-62.4105	-62.0971
115	-62.5088	-62.2067
116	-62.6062	-62.3198
117	-62.7059	-62.4322
118	-62.8029	-62.546
119	-62.899	-62.6555
120	-62.9917	-62.7653
121	-63.0816	-62.8684
122	-63.1679	-62.9715
123	-62.9757	-62.781
124	-62.7541	-62.5243
125	-62.6048	-62.3533
126	-62.5067	-62.2387
127	-62.467	-62.1891
128	-62.4566	-62.1747
129	-62.4812	-62.198
130	-62.5204	-62.2414
131	-62.5795	-62.3051
132	-62.645	-62.3801
133	-62.721	-62.4643
134	-62.7987	-62.5548
135	-62.881	-62.6473
136	-62.9625	-62.7433
137	-63.0446	-62.8367
138	-63.1248	-62.932
139	-63.2031	-63.0218
140	-63.279	-63.1128
141	-63.3516	-63.1966
142	-63.4216	-63.2813
143	-63.2405	-63.1096
144	-63.0239	-62.8699
145	-62.871	-62.7032
146	-62.7701	-62.5892
147	-62.7193	-62.5333
148	-62.7025	-62.5116
149	-62.7138	-62.5237
150	-62.7449	-62.5561
151	-62.7904	-62.6063
152	-62.847	-62.6686
153	-62.9098	-62.7385
154	-62.9785	-62.8156
155	-63.0483	-62.8939
156	-63.1208	-62.9764
157	-63.1916	-63.056
158	-63.2631	-63.1383
159	-63.3311	-63.2151
160	-63.3988	-63.2938
161	-63.462	-63.3654
162	-63.5245	-63.4386
163	-63.3504	-63.2766
164	-63.1329	-63.0451
165	-62.9825	-62.8818
166	-62.8752	-62.768
167	-62.8241	-62.7087
168	-62.7995	-62.6835
169	-62.8088	-62.6892
170	-62.8322	-62.7161
171	-62.8749	-62.7587
172	-62.9244	-62.8144
173	-62.984	-62.8763
174	-63.0463	-62.9464
175	-63.1128	-63.0167
176	-63.1797	-63.0923
177	-63.2471	-63.1643
178	-63.3137	-63.2398
179	-63.3785	-63.3096
180	-63.4419	-63.3818
181	-63.5021	-63.4469
182	-63.5608	-63.514
183	-63.3941	-63.3037
184	-63.1952	-63.0314
185	-63.0536	-62.8383
186	-62.9563	-62.7003
187	-62.9081	-62.6273
188	-62.887	-62.5894
189	-62.8955	-62.5902
190	-62.9187	-62.6112
191	-62.9585	-62.6536
192	-63.0057	-62.7074
193	-63.0615	-62.7716
194	-63.1203	-62.8422
195	-63.1826	-62.9161
196	-63.2456	-62.9934
197	-63.3086	-63.0696
198	-63.3712	-63.1477
199	-63.4318	-63.2218
200	-63.4914	-63.297
201	-63.5476	-63.3663
202	-63.6027	-63.4365
203	-63.4511	-63.2581
204	-63.2586	-63.0169
205	-63.1253	-62.8477
206	-63.0307	-62.7292
207	-62.9852	-62.6684
208	-62.9641	-62.641
209	-62.9722	-62.647
210	-62.9937	-62.673
211	-63.0314	-62.7166
212	-63.076	-62.772
213	-63.1287	-62.8352
214	-63.1845	-62.9052
215	-63.2432	-62.9769
216	-63.303	-63.0525
217	-63.3624	-63.1258
218	-63.4219	-63.2015
219	-63.4788	-63.2724
220	-63.5354	-63.3449
221	-63.5881	-63.4111
222	-63.6405	-63.4785
223	-63.6882	-63.5388
224	-63.7357	-63.6002
225	-63.778	-63.6542
226	-63.8205	-63.7093
227	-63.8575	-63.7568
228	-63.895	-63.8057
229	-63.927	-63.847
230	-63.9599	-63.89
231	-63.9872	-63.9254
232	-64.0157	-63.9629
233	-64.0388	-63.9929
234	-64.0634	-64.0253
235	-64.0827	-64.0505
236	-64.1037	-64.0783
237	-64.1196	-64.0992
238	-64.1376	-64.1229
239	-64.1505	-64.1399
240	-64.1657	-64.16
241	-64.176	-64.1736
242	-64.1889	-64.1906
243	-64.1969	-64.2012
244	-64.2078	-64.2154
245	-64.2138	-64.2235
246	-64.223	-64.2354
247	-64.2273	-64.2412
248	-64.235	-64.2511
249	-64.2379	-64.2551
250	-64.2443	-64.2632
251	-64.246	-64.2657
252	-64.2514	-64.2724
253	-64.2521	-64.2734
254	-64.2566	-64.2789
255	-64.2565	-64.2789
256	-64.2602	-64.2834
257	-64.2594	-64.2824
258	-64.2625	-64.2861
259	-64.2611	-64.2844
260	-64.2638	-64.2873
261	-64.2619	-64.285
262	-64.2642	-64.2874
263	-64.2619	-64.2847
264	-64.2639	-64.2866
265	-64.2613	-64.2835
266	-64.263	-64.2851
267	-64.2603	-64.2816
268	-64.2618	-64.283
269	-64.2588	-64.2793
270	-64.2602	-64.2805
271	-64.2571	-64.2767
272	-64.2583	-64.2777
273	-64.2552	-64.2738
274	-64.2563	-64.2747
275	-64.2531	-64.2707
276	-64.2542	-64.2716
277	-64.2509	-64.2675
278	-64.2521	-64.2684
279	-64.2487	-64.2643
280	-64.2499	-64.2651
281	-64.2465	-64.2611
282	-64.2477	-64.262
283	-64.2444	-64.2579
284	-64.2455	-64.2588
285	-64.2422	-64.2548
286	-64.2434	-64.2558
287	-64.2401	-64.2518
288	-64.2413	-64.2528
289	-64.2381	-64.249
290	-64.2393	-64.25
291	-64.2361	-64.2462
292	-64.2374	-64.2473
293	-64.2343	-64.2436
294	-64.2356	-64.2447
295	-64.2325	-64.241
296	-64.2338	-64.2423
297	-64.2308	-64.2387
298	-64.2322	-64.24
299	-64.2292	-64.2364
300	-64.2306	-64.2378
301	-64.2277	-64.2343
302	-64.2292	-64.2357
303	-64.2262	-64.2323
304	-64.2278	-64.2338
305	-64.2249	-64.2305
306	-64.2265	-64.232
307	-64.2236	-64.2287
308	-64.2252	-64.2303
309	-64.2224	-64.2271
310	-64.2241	-64.2288
311	-64.2213	-64.2256
312	-64.223	-64.2273
313	-64.2203	-64.2242
314	-64.222	-64.2259
315	-64.2193	-64.2229
316	-64.2211	-64.2247
317	-64.2184	-64.2217
318	-64.2202	-64.2235
319	-64.2176	-64.2205
320	-64.2194	-64.2224
321	-64.2168	-64.2195
322	-64.2186	-64.2214
323	-64.2161	-64.2185
324	-64.2179	-64.2205
325	-64.2154	-64.2176
326	-64.2173	-64.2196
327	-64.2148	-64.2168
328	-64.2167	-64.2188
329	-64.2142	-64.216
330	-64.2161	-64.218
331	-64.2137	-64.2153
332	-64.2156	-64.2174
333	-64.2132	-64.2147
334	-64.2151	-64.2167
335	-64.2127	-64.2141
336	-64.2147	-64.2161
337	-64.2123	-64.2135
338	-64.2143	-64.2156
339	-64.2119	-64.213
340	-64.2139	-64.2151
341	-64.2115	-64.2125
342	-64.2135	-64.2146
343	-64.2112	-64.2121
344	-64.2132	-64.2142
345	-64.2109	-64.2117
346	-64.2129	-64.2138
347	-64.2106	-64.2113
348	-64.2126	-64.2135
349	-64.2103	-64.211
350	-64.2123	-64.2131
351	-64.2101	-64.2107
352	-64.2121	-64.2128
353	-64.2098	-64.2104
354	-64.2119	-64.2125
355	-64.2096	-64.2101
356	-64.2117	-64.2123
357	-64.2094	-64.2099
358	-64.2115	-64.212
359	-64.2093	-64.2096
360	-64.2113	-64.2118
361	-64.2091	-64.2094
362	-64.2111	-64.2116
363	-64.209	-64.2093
364	-64.211	-64.2114
365	-64.2088	-64.2091
366	-64.2109	-64.2113
367	-64.2087	-64.2089
368	-64.2107	-64.2111
369	-64.2086	-64.2088
370	-64.2106	-64.211
371	-64.2085	-64.2086
372	-64.2105	-64.2108
373	-64.2084	-64.2085
374	-64.2104	-64.2107
375	-64.2083	-64.2084
376	-64.2103	-64.2106
377	-64.2082	-64.2083
378	-64.2102	-64.2105
379	-64.2081	-64.2082
380	-64.2101	-64.2104
381	-64.208	-64.2081
382	-64.2101	-64.2103
383	-64.208	-64.208
384	-64.21	-64.2102
385	-64.2079	-64.208
386	-64.2099	-64.2101
387	-64.2079	-64.2079
388	-64.2099	-64.2101
389	-64.2078	-64.2078
390	-64.2098	-64.21
391	-64.2078	-64.2078
392	-64.2098	-64.2099
393	-64.2077	-64.2077
394	-64.2097	-64.2099
395	-64.2077	-64.2077
396	-64.2097	-64.2098
397	-64.2076	-64.2076
398	-64.2096	-64.2098
399	-64.2076	-64.2076
400	-64.2096	-64.2097
401	-64.2076	-64.2076
402	-64.2096	-64.2097
	-64.2075
	-64.2096
	-64.2075
	-64.2096
	-64.2075
	-64.2095
	-64.2074
	-64.2095
	-64.2074
	-64.2095
	-64.2074
	-64.2095
	-64.2074
	-64.2094
	-64.2074
	-64.2094
	-64.2074
	-64.2094
	-64.2074
	-64.2094
	-64.2073
	-64.2094
	-64.2073
	-64.2094
	-64.2073
	-64.2093
	-64.2073
	-64.2093
	-64.2073
	-64.2093
	-64.2073
	-64.2093
	-64.2073
	-64.2093
	-64.2073
	-64.2093
	-64.2073
	-64.2093
	-64.2073
	-64.2093
	-64.2073
	-64.2093
	-64.2073
	-64.2092
	-64.2073
	-64.2092
	-64.2073
	-64.2092
	-64.2073
	-64.2092
	-64.2073
	-64.2092
	-64.2073
	-64.2092
	-64.2073
	-64.2092
	-64.2073
	-64.2092
	-64.2073
	-64.2092
	-64.2073
	-64.2092
	-64.2073
	-64.2092
	-64.2073
	-64.2092
	-64.2073
	-64.2092
	-64.2073
	-64.2092
	-64.2073
	-64.2092
	-64.2073
	-64.2092
	-64.2073
	-64.2092
	-64.2073
	-64.2092
	-64.2073
	-64.2091
	-64.2073
	-64.2091
	-64.2073
	-64.2091
	-64.2073
	-64.2091
	-64.2073
	-64.2091
	-64.2073
	-64.2091
	-64.2073
	-64.2091
	-64.2073
	-64.2091
	-64.2073
	-64.2091
	-64.2073
	-64.2091
	-64.2073
	-64.2091
	-64.2073
	-64.2091
	-64.2073
	-64.2091
	-64.2073
	-64.2091
	-64.2073
	-64.2091
	-64.2073
	-64.2091
	-64.2073
	-64.2091
	-64.2073
	-64.2091
	-64.2073
	-64.2091
	-64.2073
	-64.2091
	-64.2073
	-64.2091
	-64.2073
	-64.2091
	-64.2073
	-64.2091
	-64.2073
	-64.2091
	-64.2073
	-64.2091
	-64.2073
	-64.2091
	-64.2073
	-64.2091
	-64.2073
	-64.2091
	-64.2073
	-64.2091
	-64.2073
	-64.2091
	-64.2073
	-64.2091
	-64.2073
	-64.2091
	-64.2073
	-64.209
	-64.2074
	-64.209
	-64.2074
	-64.209
	-64.2074
	-64.209
	-64.2074
	-64.209
	-64.2074
	-64.209
	-64.2074
	-64.209
	-64.2074
	-64.209
	-64.2074
	-64.209
	-64.2074
	-64.209
	-64.2074
	-64.209
	-64.2074
	-64.209
	-64.2074
	-64.209
	-64.2074
	-64.209
	-64.2074
	-64.209
	-64.2074
	-64.209
	-64.2074
	-64.209
	-64.2074
	-64.209
	-64.2074
	-64.209
	-64.2074
	-64.209
	-64.2074
	-64.209
	-64.2074
	-64.209
	-64.2074
	-64.209
	-64.2074
	-64.209
	-64.2074
	-64.209
	-64.2074
	-64.209
	-64.2074
	-64.209
	-64.2074
	-64.209
	-64.2074
	-64.209
	-64.2074
	-64.209
	-64.2074
	-64.209
	-64.2074
	-64.209
	-64.2074
	-64.209
	-64.2074
	-64.209
	-64.2074
	-64.209
	-64.2074
	-64.209
	-64.2074
	-64.209
	-64.2074
	-64.209
	-64.2074
	-64.209
	-64.2074
	-64.209
	-64.2074
	-64.209
	-64.2074
	-64.209
	-64.2074
	-64.209
	-64.2074
	-64.209
	-64.2074
	-64.2089
	-64.2075
	-64.2089
	-64.2075
	-64.2089
	-64.2075
	-64.2089
	-64.2075
	-64.2089
	-64.2075
	-64.2089
	-64.2075
	-64.2089
	-64.2075
	-64.2089
	-64.2075
	-64.2089
	-64.2075
	-64.2089
	-64.2075
	-64.2089
	-64.2075
	-64.2089
	-64.2075
	-64.2089
	-64.2075
	-64.2089
	-64.2075
	-64.2089
	-64.2075
	-64.2089
	-64.2075
	-64.2089
	-64.2075
	-64.2089
	-64.2075
	-64.2089
	-64.2075
	-64.2089
	-64.2075
	-64.2089
	-64.2075
	-64.2089
	-64.2075
	-64.2089
	-64.2075
	-64.2089
	-64.2075
	-64.2089
	-64.2075
	-64.2089
	-64.2075
	-64.2089
	-64.2075
	-64.2089
	-64.2075
	-64.2089
	-64.2075
	-64.2089
	-64.2075
	-64.2089
	-64.2075
	-64.2089
	-64.2075
	-64.2089
	-64.2075
	-64.2089
	-64.2075
	-64.2089
