# Supplementary figures and images for: Release probability increases towards distal dendrites boosting high-frequency signal transfer in the rodent hippocampus
Source: eLife journal article supplement (doi:10.7554/elife.62588), 2021-01-13

**A**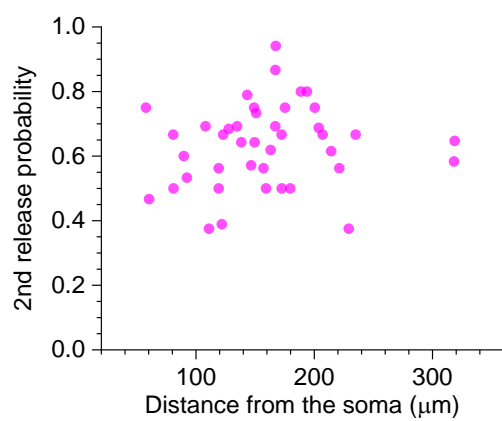**B**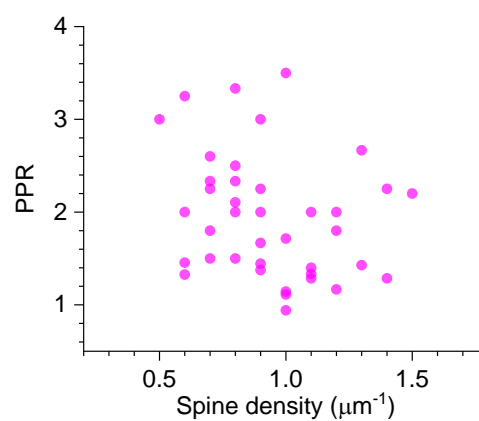

Supplement: supp [file elife-62588-supp-v1.zip]

A

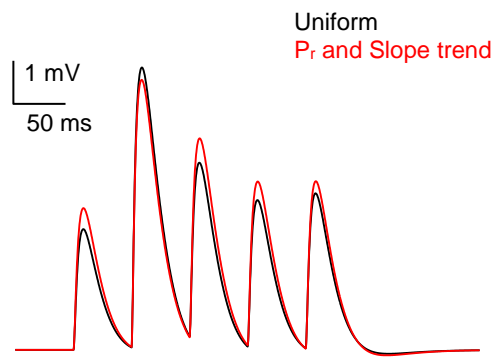

B

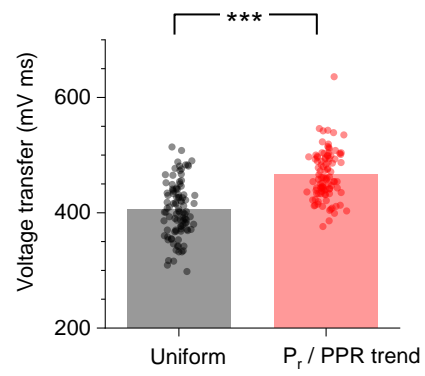

C

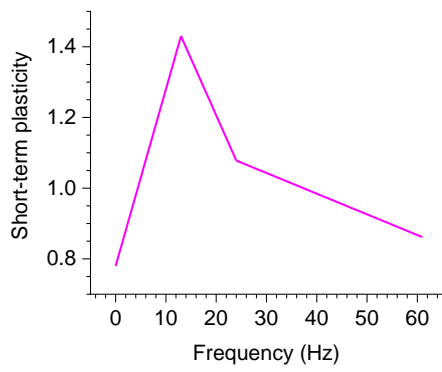

D

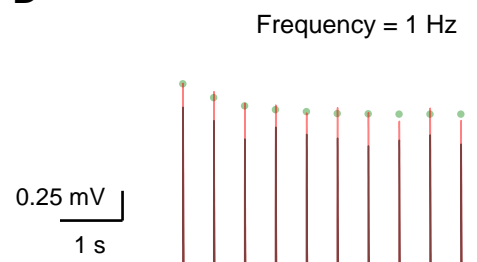

E

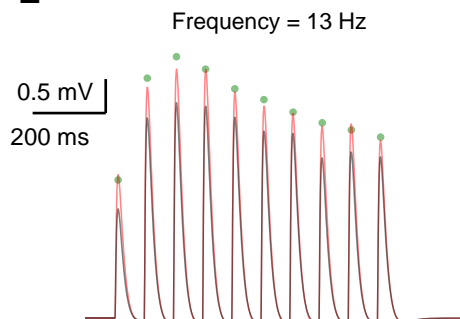

F

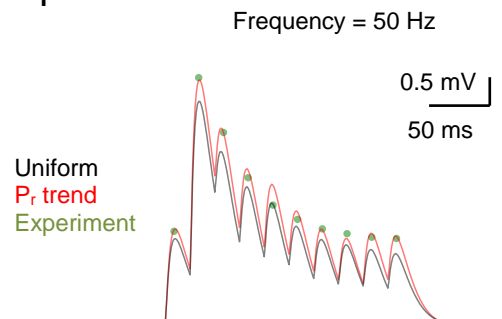

Supplement: supp [file elife-62588-supp-v1.zip]

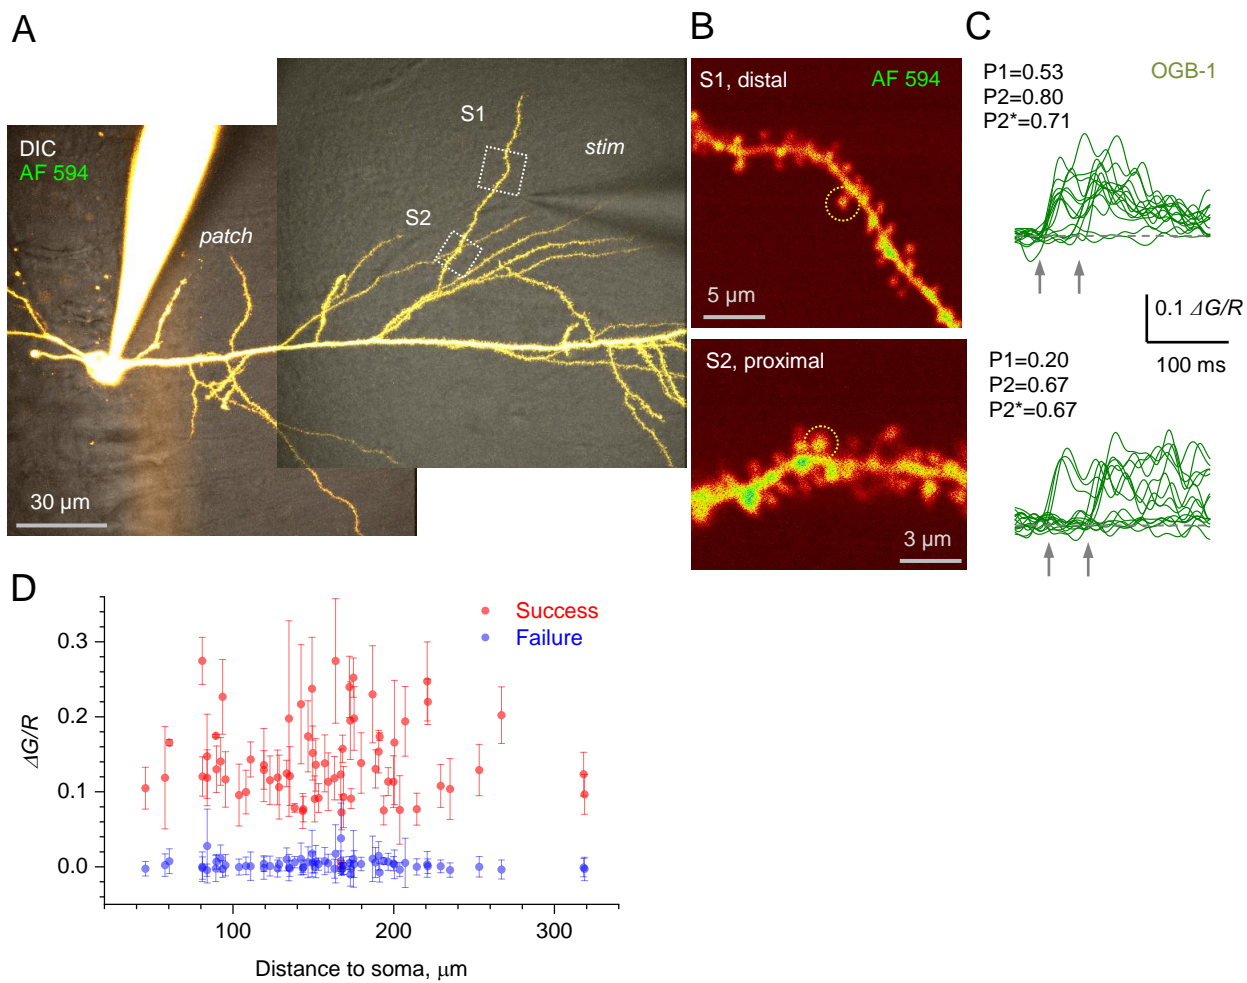

Supplement: supp [file elife-62588-supp-v1.zip]

A

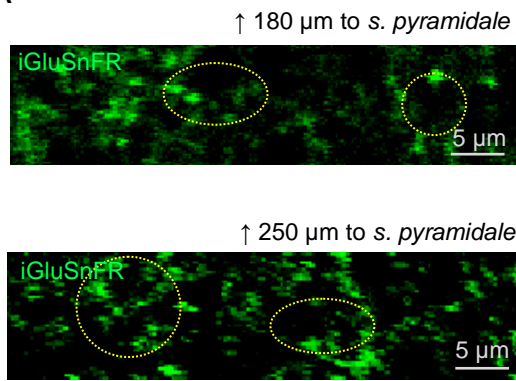

B

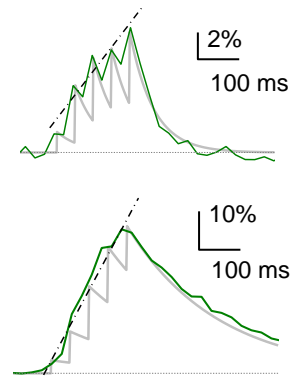

C

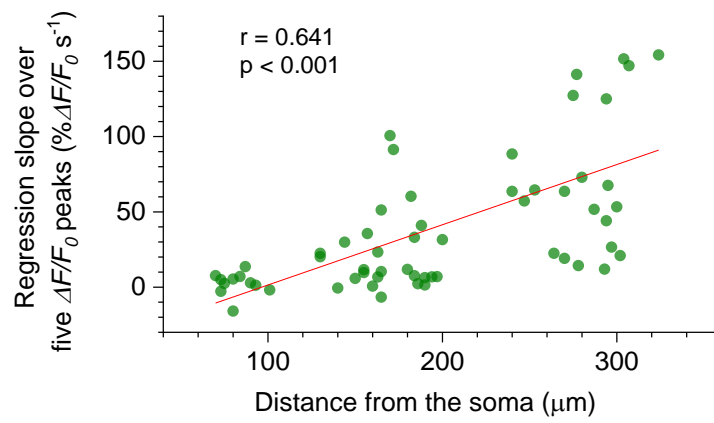

Supplement: supp [file elife-62588-supp-v1.zip]
